# Supplementary material
Source: PubMed Central journal article supplement (PMC3433808)
Supplement: NIHMS399543-supplement-1_si_001.pdf [file NIHMS399543-supplement-1_si_001.pdf]

# An Asymmetric Synthesis of 1,2,4-Trioxane Anticancer Agents via Desymmetrization of Peroxyquinols through a Brønsted Acid Catalysis Cascade

David M. Rubush<sup>†</sup>, Michelle A. Morges<sup>‡</sup>, Barbara J. Rose<sup>‡</sup>, Douglas H. Thamm<sup>‡</sup>, and Tomislav Rovis<sup>†\*</sup>

<sup>†</sup>*Colorado State University, Department of Chemistry, Fort Collins, Colorado 80523, United States*

<sup>‡</sup>*Colorado State University, Animal Cancer Center, Department of Clinical Sciences, Fort Collins, Colorado 80523*

\*rovis@lamar.colostate.edu

## Supporting Information

|                                                                             |     |
|-----------------------------------------------------------------------------|-----|
| 1. General Methods                                                          | S2  |
| 2. Reaction Optimization                                                    | S2  |
| 3. Synthesis of Starting Materials                                          | S5  |
| 4. General Procedure for Peroxyquinol Desymmetrization and Characterization | S6  |
| 5. Mechanistic Studies                                                      | S15 |
| 6. Cytotoxicity Methods                                                     | S16 |
| 7. <sup>1</sup> H NMR and <sup>13</sup> C NMR Spectra of New Compounds      | S17 |
| 8. Crystal Structure Tables for <b>4an</b>                                  | S44 |

## General Methods:

All reactions were carried out in oven-dried glassware with magnetic stirring. Dichloroethane (DCE) was distilled from CaH<sub>2</sub> under an atmosphere of argon. Dichloromethane was degassed with argon and passed through two columns of neutral alumina. Toluene was degassed with argon and passed through one column of neutral alumina and one column of Q5 reactant. Column chromatography was performed on Silicycle Inc. silica gel 60 (230-400 mesh). Thin layer chromatography was performed on Silicycle Inc. 0.25 mm silica gel 60-F plates. Visualization was accomplished with UV light (254 nm) and KMnO<sub>4</sub> followed by heating.

<sup>1</sup>H NMR and <sup>13</sup>C NMR spectra were obtained on Varian 300 or 400 MHz spectrometers in CDCl<sub>3</sub> at ambient temperature and chemical shifts are expressed in parts per million (δ, ppm). Proton chemical shifts are referenced to 7.26 ppm (CHCl<sub>3</sub>) and carbon chemical shifts are referenced to 77.0 ppm (CDCl<sub>3</sub>). NMR data reporting uses the following abbreviations: s, singlet; bs, broad singlet; d, doublet; t, triplet; q, quartet; m, multiplet; and *J*, coupling constant in Hz.

Aldehydes were either purchased from Aldrich or synthesized according to literature procedures. 4-Peroxyquinols **2a-2e** were synthesized according to the literature procedure.<sup>1</sup> Thiourea was purchased from Aldrich. Catalysts **5** and **6a** were synthesized as previously reported.<sup>15b</sup>

## Reaction Optimization: Solvents and Temperatures

A screen of solvents and temperatures found that DCE at 50 °C gave the highest yield and enantioselectivity.

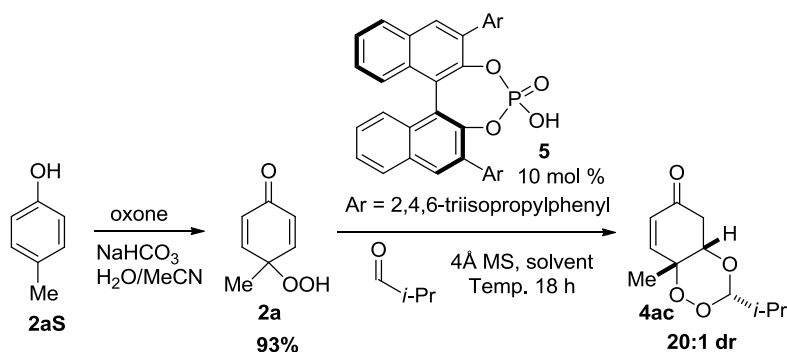

| Entry | Solvent                         | Temperature | Yield (%)  | ee%        |
|-------|---------------------------------|-------------|------------|------------|
| 1     | THF                             | 25 °C       | < 5%       | NA         |
| 2     | Dioxane                         | 25 °C       | < 5%       | NA         |
| 3     | Toluene                         | 25 °C       | 29%        | 49%        |
| 4     | CH <sub>2</sub> Cl <sub>2</sub> | 25 °C       | 38%        | 85%        |
| 5     | DCE                             | 25 °C       | 40%        | 85%        |
| 6     | DCE                             | 0 °C        | 10%        | 85%        |
| 7     | DCE                             | 50 °C       | <b>88%</b> | <b>85%</b> |
| 8     | DCE                             | 65 °C       | 85%        | 85%        |

## Reaction Optimization: Catalyst Loading

The enantioselectivity and yield dropped off if the catalyst loading was below 10 mol % presumably due to the background reaction.

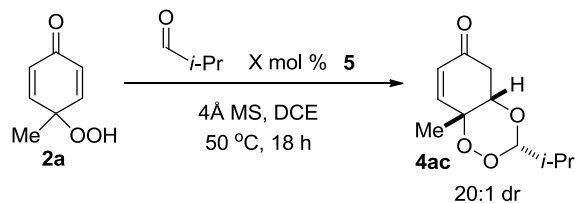

| Entry          | Catalyst Loading | Yield (%)  | ee%        |
|----------------|------------------|------------|------------|
| 1              | 1 mol %          | 13%        | 69%        |
| 2              | 2.5 mol %        | 20%        | 73%        |
| 3              | 5 mol %          | 33%        | 76%        |
| 4              | 10 mol %         | <b>92%</b> | <b>86%</b> |
| 5 <sup>a</sup> | 10 mol %         | 90%        | 74%        |
| 6              | 25 mol %         | 40%        | 86%        |

<sup>a</sup> No 4Å MS

## Reaction Optimization: Catalyst Synthesis

The procedure developed by Birman was used to synthesize the SPINOL diol and List's procedure was employed for the synthesis of phosphoric acid **6a**. The variants of **6a** were synthesized using procedures that have previously been reported for BINOL analogs.

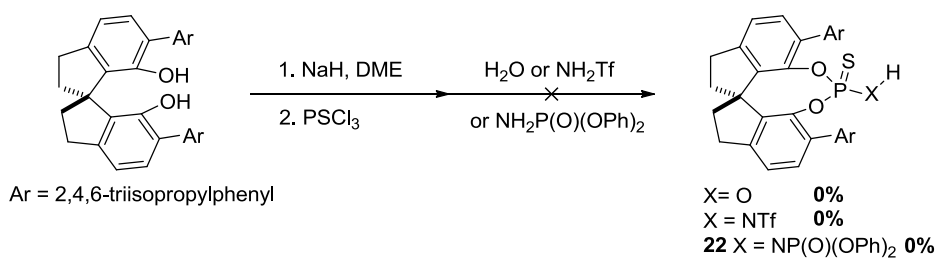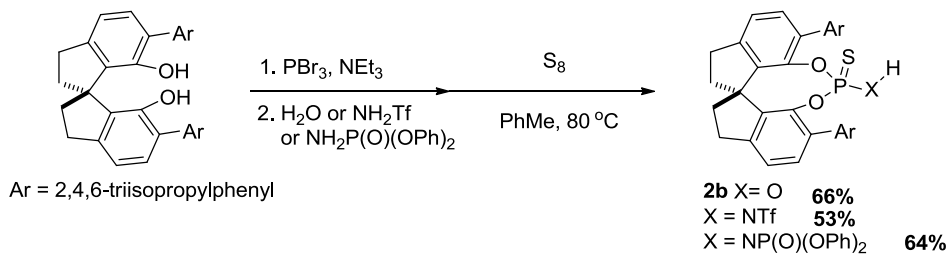

## Reaction Optimization: Catalyst Screen

A catalyst screen including commercially available **6a**<sup>15b</sup> and other derivatives<sup>2</sup>, found that SPINOL derived catalyst **6a** gave the highest yield and enantioselectivity.

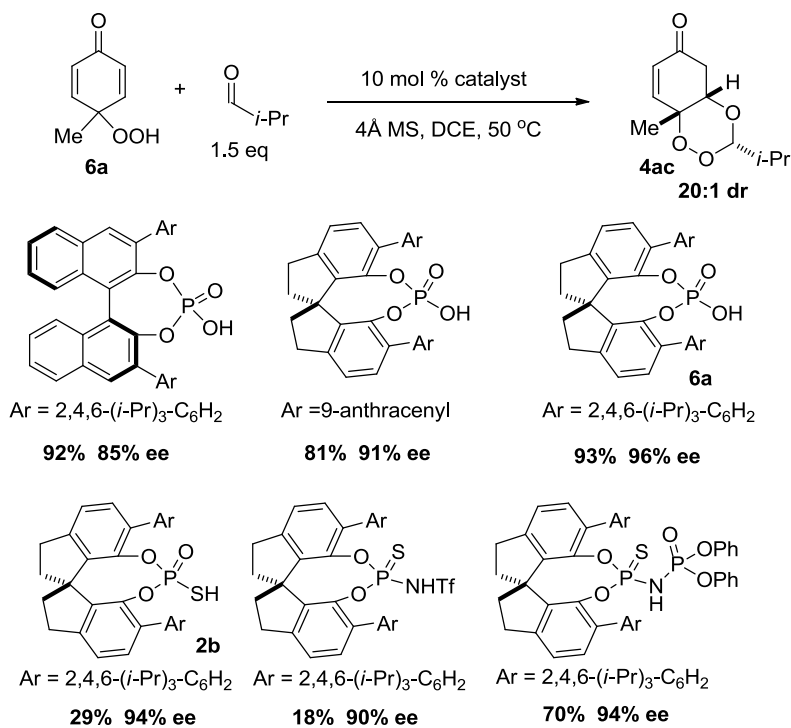

## Reaction Optimization: Co-Catalyst Screen

A screen of additives found that biaryl thiourea improved the yield while maintaining the enantioselectivity.

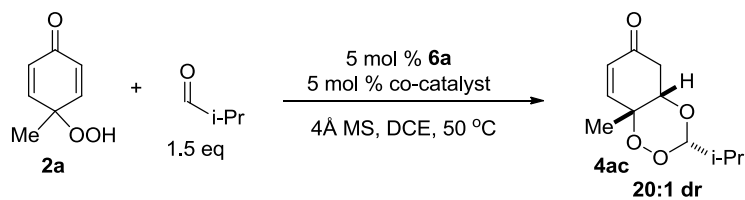

| Entry | Co-catalyst                                     | Yield (%)  | ee (%)     |
|-------|-------------------------------------------------|------------|------------|
| 1     | None                                            | 46%        | 95%        |
| 2     | <br>R = H, <i>t</i> -Bu, CN, CO <sub>2</sub> Et | < 5%       | NA         |
| 3     |                                                 | 25%        | 96%        |
| 4     |                                                 | 31%        | 95%        |
| 5     |                                                 | 24%        | 96%        |
| 6     |                                                 | <b>92%</b> | <b>96%</b> |

### Synthesis of Starting Materials:

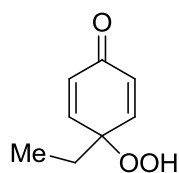

**4-ethyl-4-hydroperoxycyclohexa-2,5-dienone (2b).** Prepared according to the literature procedure for 2a: 68% yield; white solid; recrystallized from EtOAc (mp: 75-77);  $R_f = 0.11$  (85:15 Hexanes:EtOAc);  $^1\text{H NMR}$  (400 MHz, CDCl<sub>3</sub>):  $\delta$  8.77, (s, 1H), 6.86 (d,  $J = 10.2$  Hz, 2H), 6.35, (d,  $J = 10.2$  Hz, 2H), 1.74 (q,  $J = 7.6$  Hz, 2H), 0.85 (t,  $J = 7.6$ , 3H);  $^{13}\text{C NMR}$  (100 MHz, CDCl<sub>3</sub>):  $\delta$  186.0, 149.3 (2C), 131.3 (2C), 82.3, 28.9, 7.7;

**IR** (NaCl, neat): 3284, 3057, 2981, 2942, 2883, 1671, 1623, 1402, 1182, 1059, 993, 864 cm<sup>-1</sup>; **HRMS** (ESI-APCI)  $m/z$  calcd [C<sub>8</sub>H<sub>9</sub>O<sub>3</sub>]<sup>-</sup> ([M - H]<sup>-</sup>): 153.0557; found: 153.0056.

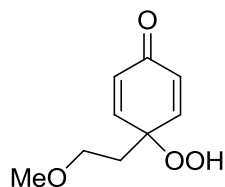

**4-(2-methoxyethyl)-4-hydroperoxycyclohexa-2,5-dienone (2d).** Prepared according to the literature procedure for 2a: 55% yield; yellow oil;  $R_f = 0.19$  (50:50 Hexanes:EtOAc);  $^1\text{H NMR}$  (400 MHz, CDCl<sub>3</sub>):  $\delta$  9.65, (s, 1H), 6.95 (d,  $J = 10.2$ , 2H), 6.28, (d,  $J = 10.2$ , 2H), 3.44 (t,  $J = 5.7$  Hz, 2H), 3.29 (s, 3H), 2.01 (t,  $J = 5.9$  Hz, 2H);  $^{13}\text{C NMR}$  (100 MHz, CDCl<sub>3</sub>):  $\delta$  185.7, 148.5 (2C), 130.1 (2C), 79.6, 67.3,

58.7, 36.1; **IR** (NaCl, neat): 3284, 2929, 2878, 2834, 1671, 1626, 1397, 1264, 1178, 1114, 862  $\text{cm}^{-1}$ ; **HRMS** (ESI-APCI)  $m/z$  calcd  $[\text{C}_9\text{H}_{12}\text{O}_4]^-$  ( $[\text{M} - \text{H}]^-$ ): 183.0657; found: 183.0657.

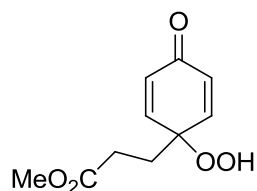

**methyl 3-(1-hydroperoxy-4-oxocyclohexa-2,5-dien-1-yl)propanoate (2e)**. Prepared according to the literature procedure for 2a: 72% yield; white solid; recrystallized from EtOAc (mp: 85-86);  $R_f = 0.14$  (67:33 Hexanes:EtOAc);  **$^1\text{H}$  NMR** (400 MHz,  $\text{CDCl}_3$ ):  $\delta$  9.25 (s, 1H), 6.89 (d,  $J = 10.2$  Hz, 2H), 6.32 (d,  $J = 10.2$  Hz, 2H), 3.66 (s, 3H), 2.33 (t,  $J = 7.5$  Hz, 2H), 2.08 (t,  $J = 7.5$  Hz, 2H);  **$^{13}\text{C}$  NMR** (100 MHz,  $\text{CDCl}_3$ ):  $\delta$  185.4, 173.2, 147.9 (2C), 131.2 (2C), 80.4, 52.1, 30.5, 28.2; **IR** (NaCl, neat): 3320, 3053, 3006, 2958, 2851, 1736, 1672, 1627, 1439, 1205, 1082, 865  $\text{cm}^{-1}$ ; **HRMS** (ESI-APCI)  $m/z$  calcd  $[\text{C}_{10}\text{H}_{11}\text{O}_5]^-$  ( $[\text{M} - \text{H}]^-$ ): 213.0606; found: 211.0612.

### General Procedure for Peroxyquinol Desymmetrization and Characterization

To an oven dried 1 mL vial, with a magnetic stir bar, was added 4-methyl-4-hydroperoxycyclohexa-2,5-dienone **1** (0.1 mmol, 1.0 equiv), phosphoric acid **6a** (3.6 mg, 0.005 mmol, 0.05 equiv), thiourea **7** (1.8 mg, 0.005 mmol, 0.05 equiv), aldehyde (0.15 mmol, 1.25 equiv), activated 4Å molecular sieves (25 mg) and 1,2-dichloroethane (0.4 mL). The vial was then sealed, heated to 45 °C and stirred until the starting material disappeared by TLC (12-48h). The reaction was concentrated *in vacuo*. Column chromatography 10-20% (hexanes:ethyl acetate) of the resulting yellow residue gave the analytically pure 1,2,4-trioxane as a white solid or clear oil.

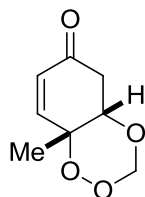

**(4aS,8aR)-8a-methyl-4a,5-dihydrobenzo[e][1,2,4]trioxin-6(8aH)-one (4aa)**. Prepared according to the general procedure: 89% yield; >20:1 dr; 94% ee; white solid;  $R_f = 0.16$  (80:20 Hexanes:EtOAc);  $[\alpha]_D^{20} = -108.5$ ,  $c = 0.0024$  g/ml  $\text{CH}_2\text{Cl}_2$ ; HPLC analysis: Chiralcel IA column, 95:5 Hexanes:*iso*-propanol, 1.0 ml/min,  $\text{RT}_{\text{minor}} = 11.59$  min,  $\text{RT}_{\text{major}} = 12.69$  min, 210 nm.  **$^1\text{H}$  NMR** (400 MHz,  $\text{CDCl}_3$ ):  $\delta$  6.88 (dd,  $J = 10.4$ , 2.7 Hz, 1H), 6.11 (d,  $J = 10.4$  Hz, 1H), 5.42 (d,  $J = 8.5$  Hz, 1H), 5.16 (d,  $J = 8.5$  Hz, 1H), 4.15 (q,  $J = 2.9$  Hz, 1H), 2.71 (d,  $J = 3.0$  Hz, 2H), 1.34, (s, 3H).  **$^{13}\text{C}$  NMR** (100 MHz,  $\text{CDCl}_3$ ):  $\delta$  194.5, 150.6, 129.8, 95.8, 79.1, 75.8, 40.8, 20.9; **IR** (NaCl, neat): 3043, 2987, 2921, 2865, 1674, 1625, 1388, 1149, 817  $\text{cm}^{-1}$ ; **HRMS** (ESI-APCI)  $m/z$   $[\text{C}_8\text{H}_{11}\text{O}_4]^+$  ( $[\text{M} + \text{H}]^+$ ): calcd 170.0652, found 170.0653.

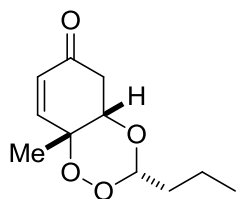

**(3S,4aS,8aR)-8a-methyl-3-propyl-4a,5-dihydrobenzo[e][1,2,4]trioxin-6(8aH)-one (4ab)**. Prepared according to the general procedure: 90% yield; >20:1 dr; 95% ee; clear oil;  $R_f = 0.27$  (80:20 Hexanes:EtOAc);  $[\alpha]_D^{20} = -67.0$ ,  $c = 0.0031$  g/ml  $\text{CH}_2\text{Cl}_2$ ; HPLC analysis: Chiralcel IA column, 99:1 Hexanes:*iso*-propanol, 1.0 ml/min,  $\text{RT}_{\text{minor}} = 17.57$  min,  $\text{RT}_{\text{major}} = 23.80$  min, 210 nm.  **$^1\text{H}$  NMR** (400 MHz,  $\text{CDCl}_3$ ):  $\delta$  6.84 (dd,  $J = 10.4$ , 3.0 Hz, 1H), 6.07 (d,  $J = 10.4$  Hz, 1H), 5.25 (t,  $J = 5.2$

Hz, 1H), 4.15 (q,  $J = 2.9$  Hz, 1H), 2.69, (d,  $J = 3.0$  Hz, 2H), 1.53-1.45 (m, 2H), 1.44-1.33 (m, 2H), 1.33 (s, 3H), 0.88 (t,  $J = 7.4$  Hz, 3H);  $^{13}\text{C}$  NMR (100 MHz,  $\text{CDCl}_3$ ):  $\delta$  194.9, 151.0, 129.6, 104.0, 77.7, 76.3, 41.0, 33.7, 20.6, 16.8, 13.8; IR (NaCl, neat): 3055, 2936, 2878, 1683, 1460, 1385, 1231, 1094, 835, 783  $\text{cm}^{-1}$ ; HRMS (ESI-APCI)  $m/z$  calcd  $[\text{C}_{11}\text{H}_{17}\text{O}_4]^+$  ( $[\text{M} + \text{H}]^+$ ): 213.1121, found 213.1120.

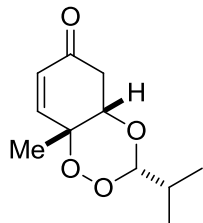

**(3S,4aS,8aR)-3-isopropyl-8a-methyl-4a,5-dihydrobenzo[e][1,2,4]trioxin-6(8aH)-one (4ac).** Prepared according to the general procedure: 92% yield; >20:1 dr; 96% ee; white solid;  $R_f = 0.29$  (80:20 Hexanes:EtOAc);  $[\alpha]_D^{20} = -49.5$ ,  $c = 0.0123$  g/ml  $\text{CH}_2\text{Cl}_2$ ; HPLC analysis: Chiralcel IC column, 97:3 Hexanes:iso-propanol, 1.0 ml/min,  $\text{RT}_{\text{minor}} = 7.92$  min,  $\text{RT}_{\text{major}} = 9.60$  min, 210 nm.  $^1\text{H}$  NMR (400 MHz,  $\text{CDCl}_3$ ):  $\delta$  6.84 (dd,  $J = 10.4$  Hz, 2.7 Hz, 1H), 6.06 (d,  $J = 10.4$  Hz, 1H), 5.01 (d,  $J = 5.1$  Hz, 1H), 4.14 (q,  $J = 2.9$  Hz, 1H), 2.72-2.69 (m, 2H), 1.84-1.71 (m, 1H), 1.33, (s, 3H), 0.88 (d,  $J = 3.9$  Hz, 6H);  $^{13}\text{C}$  NMR (100 MHz,  $\text{CDCl}_3$ ):  $\delta$  195.1, 151.1, 129.5, 101.1, 77.7, 76.3, 41.0, 30.9, 20.5, 16.7, 16.6; IR (NaCl, neat): 3041, 2971, 2935, 2880, 1684, 1473, 1388, 1289, 1081, 843  $\text{cm}^{-1}$ ; HRMS (ESI-APCI)  $m/z$  calcd  $[\text{C}_{11}\text{H}_{17}\text{O}_4]^+$  ( $[\text{M} + \text{H}]^+$ ): 213.1121; found: 213.1119.

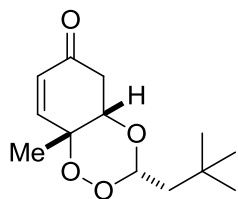

**(3S,4aS,8aR)-8a-methyl-3-neopentyl-4a,5-dihydrobenzo[e][1,2,4]trioxin-6(8aH)-one (4ad).** Prepared according to the general procedure: 84% yield; >20:1 dr; 96% ee; white solid;  $R_f = 0.30$  (80:20 Hexanes:EtOAc);  $[\alpha]_D^{20} = -120.0$ ,  $c = 0.0047$  g/ml  $\text{CH}_2\text{Cl}_2$ ; HPLC analysis: Chiralcel IC column, 97:3 Hexanes:iso-propanol, 1.0 ml/min,  $\text{RT}_{\text{minor}} = 12.32$  min,  $\text{RT}_{\text{major}} = 18.11$  min, 210 nm.  $^1\text{H}$  NMR (400 MHz,  $\text{CDCl}_3$ ):  $\delta$  6.84 (dd,  $J = 10.4$ , 2.8 Hz, 1H), 6.06 (d,  $J = 10.4$  Hz, 1H), 5.25 (t,  $J = 4.9$  Hz, 1H), 4.16 (q,  $J = 2.9$  Hz, 1H), 2.68, (d,  $J = 3.0$  Hz, 2H), 1.46-1.36 (m, 2H), 1.33 (s, 3H), 0.92 (s, 9H);  $^{13}\text{C}$  NMR (100 MHz,  $\text{CDCl}_3$ ):  $\delta$  194.9, 151.1, 129.6, 103.2, 77.5, 76.3, 45.4, 41.0, 29.8 (3C), 29.2, 20.6; IR (NaCl, neat): 3057, 2959, 2902, 2877, 1683, 1452, 1367, 1235, 1108, 1070, 792, 740  $\text{cm}^{-1}$ ; HRMS (ESI-APCI)  $m/z$  calcd  $[\text{C}_{13}\text{H}_{21}\text{O}_4]^+$  ( $[\text{M} + \text{H}]^+$ ): 241.1434, found 241.1423.

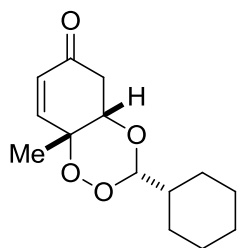

**(3S,4aS,8aR)-3-cyclohexyl-8a-methyl-4a,5-dihydrobenzo[e][1,2,4]trioxin-6(8aH)-one (4ae).** Prepared according to the general procedure: 77% yield; >20:1 dr; 98% ee; white solid;  $R_f = 0.32$  (80:20 Hexanes:EtOAc);  $[\alpha]_D^{20} = -91.8$ ,  $c = 0.0073$  g/ml  $\text{CH}_2\text{Cl}_2$ ; HPLC analysis: Chiralcel IA column, 97:3 Hexanes:iso-propanol, 1.0 ml/min,  $\text{RT}_{\text{minor}} = 8.30$  min,  $\text{RT}_{\text{major}} = 8.97$  min, 210 nm.  $^1\text{H}$  NMR (400 MHz,  $\text{CDCl}_3$ ):  $\delta$  6.83 (dd,  $J = 10.4$ , 2.7 Hz, 1H), 6.06 (d,  $J = 10.4$  Hz, 1H), 5.01 (d,  $J = 5.4$  Hz, 1H), 4.13 (q,  $J = 2.9$  Hz, 1H), 2.60-2.68, (m, 2H), 1.72-1.42 (m, 6H), 1.32 (s, 3H), 1.20-0.97 (m, 5H);  $^{13}\text{C}$  NMR (100 MHz,  $\text{CDCl}_3$ ):  $\delta$  195.2, 151.1, 129.5, 106.5, 77.8, 76.3, 41.0, 40.3, 26.83, 26.75, 26.1, 25.48, 25.47, 20.5; IR (NaCl, neat): 2932, 2855, 1684, 1450, 1230, 1115, 1065, 780  $\text{cm}^{-1}$ ; HRMS (ESI-APCI)  $m/z$  calcd  $[\text{C}_{14}\text{H}_{21}\text{O}_4]^+$  ( $[\text{M} + \text{H}]^+$ ): 253.1434, found 253.1440.

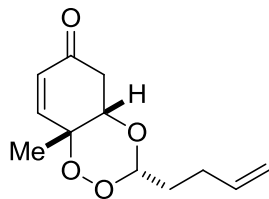

**(3S,4aS,8aR)-3-(but-3-en-1-yl)-8a-methyltetrahydrobenzo[e][1,2,4]trioxin-6(7H)-one (4af)**. Prepared according to the general procedure: 95% yield; >20:1 dr; 97% ee; clear oil;  $R_f = 0.40$  (67:33 Hexanes:EtOAc);  $[\alpha]_D^{20} = -44.5$ ,  $c = 0.0046$  g/ml  $\text{CH}_2\text{Cl}_2$ ; HPLC analysis: Chiralcel IC column, 97:3 Hexanes:*iso*-propanol, 1.0 ml/min,  $\text{RT}_{\text{minor}} = 15.27$  min,  $\text{RT}_{\text{major}} = 20.12$  min, 210 nm.  $^1\text{H NMR}$  (400 MHz,  $\text{CDCl}_3$ ):  $\delta$  6.85 (dd,  $J = 10.4, 2.8$  Hz, 1H), 6.08 (d,  $J = 10.9$  Hz, 1H), 5.75 (dddd,  $J = 16.9, 10.2, 6.6, 6.6$  Hz, 1H), 5.28, (t,  $J = 5.3$  Hz, 1H), 5.05-4.95 (m, 2H), 4.17 (q,  $J = 2.9$  Hz, 1H), 2.73-2.69 (m, 2H), 2.15-2.08 (m, 2H), 1.66-1.59, (m, 2H), 1.34, (s, 3H);  $^{13}\text{C NMR}$  (100 MHz,  $\text{CDCl}_3$ ):  $\delta$  194.9, 151.0, 137.1, 129.7, 115.4, 103.5, 77.8, 76.4, 41.0, 30.9, 27.5, 20.6; **IR** (NaCl, neat): 3077, 2980, 2934, 2886, 1684, 1642, 1387, 1112, 1063, 915, 782  $\text{cm}^{-1}$ ; **HRMS** (ESI-APCI)  $m/z$  calcd  $[\text{C}_{12}\text{H}_{19}\text{O}_4]^+$  ( $[\text{M} + \text{H}]^+$ ): 225.1121, found 225.1124.

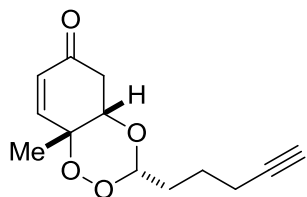

**(3S,4aS,8aR)-8a-methyl-3-(pent-4-yn-1-yl)-4a,5-dihydrobenzo[e][1,2,4]trioxin-6(8aH)-one (4ag)**. Prepared according to the general procedure: 83% yield; >20:1 dr; 97% ee; clear oil;  $R_f = 0.38$  (67:33 Hexanes:EtOAc);  $[\alpha]_D^{20} = -54.3$ ,  $c = 0.0124$  g/ml  $\text{CH}_2\text{Cl}_2$ ; HPLC analysis: Chiralcel IA column, 95:5 Hexanes:*iso*-propanol, 1.0 ml/min,  $\text{RT}_{\text{minor}} = 17.52$  min,  $\text{RT}_{\text{major}} = 25.04$  min, 210 nm.  $^1\text{H NMR}$  (400 MHz,  $\text{CDCl}_3$ ):  $\delta$  6.85 (dd,  $J = 10.4, 2.8$  Hz, 1H), 6.08 (d,  $J = 10.4$  Hz, 1H), 5.30 (dd,  $J = 4.8, 4.8$  Hz, 1H), 4.17 (dd,  $J = 5.9, 3.0$  Hz, 1H), 2.76-2.65 (m, 2H), 2.18 (ddd,  $J = 7.0, 7.0, 2.7$  Hz, 2H), 1.94 (t,  $J = 2.6$  Hz, 1H), 1.71-1.55 (m, 4H), 1.34 (s, 3H);  $^{13}\text{C NMR}$  (100 MHz,  $\text{CDCl}_3$ ):  $\delta$  194.8, 150.9, 129.7, 103.5, 83.5, 77.8, 76.4, 68.9, 40.9, 30.7, 22.3, 20.6, 18.1; **IR** (NaCl, neat): 3291, 2963, 2935, 2884, 2116, 1683, 1387, 1231, 1115, 783  $\text{cm}^{-1}$ ; **HRMS** (ESI-APCI)  $m/z$  calcd  $[\text{C}_{13}\text{H}_{17}\text{O}_4]^+$  ( $[\text{M} + \text{H}]^+$ ): 237.1121, found 237.1110.

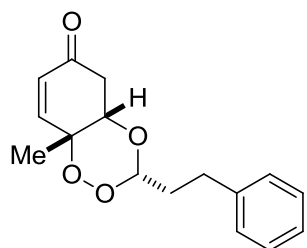

**(3S,4aS,8aR)-8a-methyl-3-phenethyl-4a,5-dihydrobenzo[e][1,2,4]trioxin-6(8aH)-one (4ah)**. Prepared according to the general procedure: % yield; 93% ee; white solid;  $R_f = 0.21$  (80:20 hexanes:EtOAc);  $[\alpha]_D^{20} = -92.4$ ,  $c = 0.0093$  g/ml  $\text{CH}_2\text{Cl}_2$ ; HPLC analysis: Chiralcel IC column, 97:3 Hexanes:*iso*-propanol, 1.0 ml/min,  $\text{RT}_{\text{minor}} = 21.64$  min,  $\text{RT}_{\text{major}} = 32.11$  min, 210 nm.  $^1\text{H NMR}$  (400 MHz,  $\text{CDCl}_3$ ):  $\delta$  7.28-7.10 (m, 5 H), 6.84 (dd,  $J = 2.7, 10.4$  Hz, 1H), 6.07 (d,  $J = 10.4$  Hz, 1H), 5.22 (t,  $J = 5.3$  Hz, 1H), 4.12 (q,  $J = 2.9$  Hz, 1H), 2.71-2.62 (m, 4H), 1.86-1.78 (m, 2H), 1.30 (s, 3H);  $^{13}\text{C NMR}$  (100 MHz,  $\text{CDCl}_3$ ):  $\delta$  194.9, 151.0, 140.7, 129.6, 128.4, 128.3, 126.1, 103.1, 77.8, 76.3, 40.9, 33.1, 29.5, 20.5; **IR** (NaCl, neat): 3062, 3028, 2963, 2934, 2887, 1683, 1604, 1497, 1455, 1387, 1202, 1113, 898, 701  $\text{cm}^{-1}$ ; **HRMS** (ESI-APCI)  $m/z$  calcd  $[\text{C}_{16}\text{H}_{19}\text{O}_4]^+$  ( $[\text{M} + \text{H}]^+$ ): calcd 275.1287, found 275.1275.

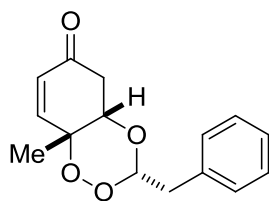

**(3S,4aS,8aR)-3-benzyl-8a-methyl-4a,5-dihydrobenzo[e][1,2,4]trioxin-6(8aH)-one (4ai)**. Prepared according to the general procedure: 83% yield; >20:1 dr; 90% ee; white solid;  $R_f = 0.20$  (80:20 Hexanes:EtOAc);  $[\alpha]_D^{20} = -$



125.0,  $c = 0.0075$  g/ml  $\text{CH}_2\text{Cl}_2$ ; HPLC analysis: Chiralcel OC column, 80:20 Hexanes:*iso*-propanol, 1.0 ml/min,  $\text{RT}_{\text{minor}} = 8.14$  min,  $\text{RT}_{\text{major}} = 9.53$  min, 210 nm.  $^1\text{H NMR}$  (400 MHz,  $\text{CDCl}_3$ ):  $\delta$  7.29-7.14, (m, 5H), 6.84 (dd,  $J = 10.4, 2.7$  Hz, 1H), 6.07 (d,  $J = 10.4$  Hz, 1H), 5.41 (d,  $J = 5.4$  Hz, 1H), 4.14 (d,  $J = 2.9$  Hz, 1H), 2.81 (d,  $J = 5.4$  Hz, 2H), 2.68, (dd,  $J = 5.4, 3.0$  Hz, 2H), 1.31, (s, 3H);  $^{13}\text{C NMR}$  (100 MHz,  $\text{CDCl}_3$ ):  $\delta$  194.9, 150.8, 134.6, 129.68, 129.58 (2C), 128.3 (2C), 126.8, 104.3, 77.8, 76.5, 40.9, 38.5, 20.5; **IR** (NaCl, neat): 3063, 3032, 2982, 2888, 1684, 1497, 1455, 1385, 1350, 1281, 1173, 1110, 897, 700  $\text{cm}^{-1}$ ; **HRMS** (ESI-APCI)  $m/z$  calcd  $[\text{C}_{15}\text{H}_{17}\text{O}_4]^+$  ( $[\text{M} + \text{H}]^+$ ): 261.1121, found 261.1119.

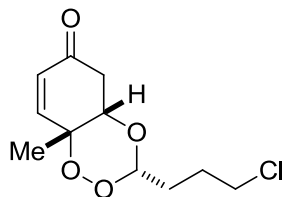

**(3S,4aS,8aR)-3-(3-chloropropyl)-8a-methyl-4a,5-dihydrobenzo[e][1,2,4]trioxin-6-one (4aj)**. Prepared according to the general procedure: 97% yield; >20:1 dr; 97% ee; clear oil;  $R_f = 0.36$  (67:33 Hexanes:EtOAc);  $[\alpha]_{\text{D}}^{20} = -91.0$ ,  $c = 0.0208$  g/ml  $\text{CH}_2\text{Cl}_2$ ; HPLC analysis: Chiralcel IA column, 97:3 Hexanes:*iso*-propanol, 1.0 ml/min,  $\text{RT}_{\text{minor}} = 18.97$  min,  $\text{RT}_{\text{major}} = 20.00$  min, 210 nm.  $^1\text{H NMR}$  (400 MHz,  $\text{CDCl}_3$ ):  $\delta$  6.85 (dd,  $J = 10.4, 2.8$  Hz, 1H), 6.08 (d,  $J = 10.4$  Hz, 1H), 5.31 (t,  $J = 5.1$  Hz, 1H), 4.18 (q,  $J = 2.9$  Hz, 1H), 3.50 (t,  $J = 6.4$  Hz, 2H), 2.70 (d,  $J = 3.0$  Hz, 2H), 1.88-1.80 (m, 2H), 1.74-1.68 (m, 2H), 1.34 (s, 3H);  $^{13}\text{C NMR}$  (100 MHz,  $\text{CDCl}_3$ ):  $\delta$  194.8, 150.8, 129.7, 103.1, 77.8, 76.4, 44.4, 40.9, 29.1, 26.3, 20.5; **IR** (NaCl, neat): 3040, 2966, 2935, 2886, 1683, 1445, 1386, 1231, 1150, 1083, 783  $\text{cm}^{-1}$ ; **HRMS** (ESI-APCI)  $m/z$  calcd  $[\text{C}_{11}\text{H}_{17}\text{O}_4\text{Cl}]^+$  ( $[\text{M} + \text{H}]^+$ ): 247.0732, found 247.0734.

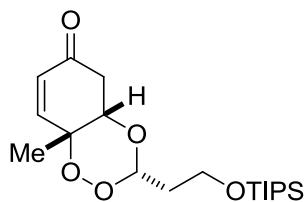

**(3S,4aS,8aR)-8a-methyl-3-(2-((triisopropylsilyl)oxy)ethyl)-4a,5-dihydrobenzo[e][1,2,4]trioxin-6-one (4ak)**. Prepared according to the general procedure: 71% yield; >20:1 dr; 94% ee; clear oil;  $R_f = 0.25$  (80:20 Hexanes:EtOAc);  $[\alpha]_{\text{D}}^{20} = -92.4$ ,  $c = 0.0091$  g/ml  $\text{CH}_2\text{Cl}_2$ ; HPLC analysis: Chiralcel IA column, 97:3 Hexanes:*iso*-propanol, 1.0 ml/min,  $\text{RT}_{\text{minor}} = 10.01$  min,  $\text{RT}_{\text{major}} = 14.93$  min, 210 nm.  $^1\text{H NMR}$  (400 MHz,  $\text{CDCl}_3$ ):  $\delta$  6.86 (dd,  $J = 10.4, 2.7$  Hz, 1H), 6.08 (d,  $J = 10.4$  Hz, 1H), 5.48 (t,  $J = 5.4$  Hz, 1H), 4.16 (q,  $J = 2.9$  Hz, 1H), 3.83-3.69 (m, 2H), 2.71 (d,  $J = 2.9$  Hz, 2H), 1.83-1.74 (m, 1H), 1.73-1.64 (m, 1H), 1.35 (s, 3H), 1.13-1.01 (m, 19H);  $^{13}\text{C NMR}$  (100 MHz,  $\text{CDCl}_3$ ):  $\delta$  195.0, 151.1, 129.7, 101.9, 77.9, 76.4, 58.0, 41.0, 35.0, 20.6, 17.95 (3C), 17.93 (3C), 11.9 (3C); **IR** (NaCl, neat): 2943, 2867, 1686, 1463, 1385, 1230, 1108, 1071, 883, 681  $\text{cm}^{-1}$ ; **HRMS** (ESI-APCI)  $m/z$  calcd  $[\text{C}_{19}\text{H}_{35}\text{O}_5\text{Si}]^+$  ( $[\text{M} + \text{H}]^+$ ): 371.2248, found 371.2250.

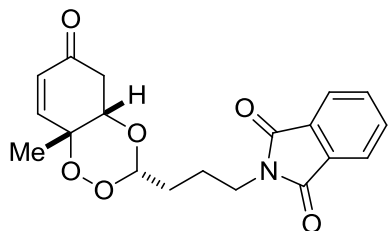

**2-(3-((3S,4aS,8aR)-8a-methyl-6-oxo-4a,5,6,8a-tetrahydrobenzo[e][1,2,4]trioxin-3-yl)propyl)isoindoline-1,3-dione (4al)**. Prepared according to the general procedure: 81% yield; >20:1 dr; 98% ee; white solid;  $R_f = 0.16$  (67:33 Hexanes:EtOAc);  $[\alpha]_{\text{D}}^{20} = -103.0$ ,  $c = 0.0026$  g/ml  $\text{CH}_2\text{Cl}_2$ ; HPLC analysis: Chiralcel IC column, 70:30 Hexanes:*iso*-propanol, 1.0 ml/min,  $\text{RT}_{\text{minor}} = 27.10$  min,  $\text{RT}_{\text{major}} = 28.20$  min, 210 nm.  $^1\text{H NMR}$  (400 MHz,  $\text{CDCl}_3$ ):  $\delta$  7.83-7.78 (m,

2H), 7.72-7.66 (m, 2H), 6.83 (dd,  $J = 10.4, 2.8$  Hz, 1H), 6.06 (d,  $J = 10.4$  Hz, 1H), 5.30 (t,  $J = 5.1$  Hz, 1H), 4.16 (q,  $J = 2.9$  Hz, 1H), 3.64 (t,  $J = 7.2$  Hz, 2H), 2.67 (d,  $J = 2.8$  Hz, 2H), 1.79-1.70, (m, 2H), 1.62-1.55 (m, 2H), 1.32 (s, 3H);  $^{13}\text{C}$  NMR (100 MHz,  $\text{CDCl}_3$ ):  $\delta$  194.7, 168.2 (2C), 150.8, 133.9 (2C), 132.0 (2C), 129.7, 123.2 (2C), 103.2, 77.8, 76.3, 40.8, 37.4, 29.1, 22.6, 20.5; IR (NaCl, neat): 3061, 2937, 2884, 1772, 1716, 1615, 1398, 1049, 721  $\text{cm}^{-1}$ ; HRMS (ESI-APCI)  $m/z$  calcd  $[\text{C}_{19}\text{H}_{19}\text{NO}_6\text{Na}]^+$  ( $[\text{M} + \text{Na}]^+$ ): 380.1105, found 380.1102.

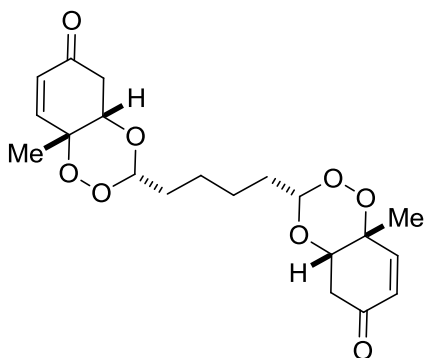

**(3S,3'S,4aS,4a'S,8aR,8a'R)-3,3'-(butane-1,4-diyl)bis(8a-methyl-4a,5-dihydrobenzo[e][1,2,4]trioxin-6(8aH)-one) (4am)**. Prepared according to the general procedure: 79% yield; 96% ee; clear oil;  $R_f = 0.15$  (60:40 hexanes:ethyl acetate);  $[\alpha]_D^{20} = -117.8$ ,  $c = 0.0026$  g/ml  $\text{CH}_2\text{Cl}_2$ ; HPLC analysis: Chiralcel IA column, 60:40 Hexanes:*iso*-propanol, 1.0 ml/min,  $\text{RT}_{\text{minor}} = 8.26$  min,  $\text{RT}_{\text{major}} = 9.95$  min, 210 nm.  $^1\text{H}$  NMR (400 MHz,  $\text{CDCl}_3$ ):  $\delta$  6.84 (dd,  $J = 2.7, 10.4$  Hz, 2H), 6.07 (d,  $J = 10.4$  Hz, 2H), 5.23 (t,  $J = 5.2$  Hz, 2H), 4.15 (q,  $J = 2.9$  Hz, 2H), 2.69 (d,  $J = 3.1$  Hz, 4H), 1.53-1.45 (m, 4H), 1.37-1.30 (m, 4H), 1.33 (s, 6H);  $^{13}\text{C}$  NMR (100 MHz,  $\text{CDCl}_3$ ):  $\delta$  194.9, 151.0, 129.6, 103.9, 77.8, 76.3, 41.0, 31.5, 23.1, 20.6; IR (NaCl, neat): 3056, 2949, 2877, 1683, 1463, 1387, 1232, 1144, 1036, 780, 733  $\text{cm}^{-1}$ ; HRMS (ESI-APCI)  $m/z$  calcd  $[\text{C}_{20}\text{H}_{27}\text{O}_8]^+$  ( $[\text{M} + \text{H}]^+$ ): calcd 395.1700, found 395.1697.

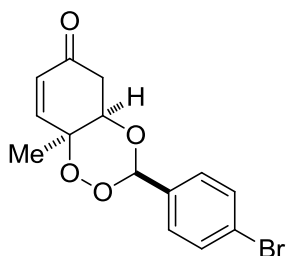

**(3R,4aR,8aS)-3-(4-bromophenyl)-8a-methyl-4a,5-dihydrobenzo[e][1,2,4]trioxin-6(8aH)-one (4an)**. Prepared according to the general procedure using the **opposite** antipode of catalyst **6a**: 66% yield; 91% ee; white solid;  $R_f = 0.1$  (80:20 hexanes:EtOAc);  $[\alpha]_D^{20} = +113.7$ ,  $c = 0.0097$  g/ml  $\text{CH}_2\text{Cl}_2$ ; HPLC analysis: Chiralcel IA column, 97:3 Hexanes:*iso*-propanol, 1.0 ml/min,  $\text{RT}_{\text{minor}} = 26.89$  min,  $\text{RT}_{\text{major}} = 31.31$  min, 210 nm.  $^1\text{H}$  NMR (400 MHz,  $\text{CDCl}_3$ ):  $\delta$  7.41 (d,  $J = \text{Hz}$ , 2H), 7.20 (dd,  $J = \text{Hz}$ , 2H), 6.85 (dd,  $J = 2.8, 10.4$  Hz, 1H), 6.11 (s, 1H), 6.08 (dd,  $J = 0.9, 10.4$  Hz, 1H), 4.32 (q,  $J = 3.0$  Hz, 1H), 2.77 (ddd,  $J = 0.9, 3.0, 17.5$  Hz, 1H), 2.71 (dd,  $J = 3.1, 17.5$  Hz, 1H), 1.36 (s, 3H);  $^{13}\text{C}$  NMR (100 MHz,  $\text{CDCl}_3$ ):  $\delta$  194.6, 150.7, 132.4, 131.7, 129.8, 128.7, 124.5, 102.8, 78.0, 77.0, 40.9, 20.6; IR (NaCl, neat): 2906, 1680, 1601, 1500, 1346  $\text{cm}^{-1}$ ; HRMS (ESI-APCI)  $m/z$  calcd  $[\text{C}_{14}\text{H}_{14}\text{O}_4\text{Br}]^+$  ( $[\text{M} + \text{H}]^+$ ): calcd 325.0070, found 325.0084.

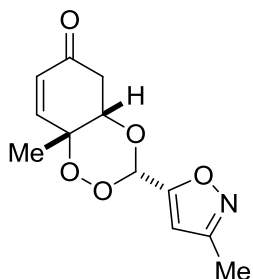

**(3S,4aS,8aR)-8a-methyl-3-(3-methylisoxazol-5-yl)-4a,5-dihydrobenzo[e][1,2,4]trioxin-6(8aH)-one (4ao)**. Prepared according to the general procedure: 53% yield; 91% ee; white solid;  $R_f = 0.21$  (67:33 hexanes:EtOAc);  $[\alpha]_D^{20} = -84.0$ ,  $c = 0.0054$  g/ml  $\text{CH}_2\text{Cl}_2$ ; HPLC analysis: Chiralcel IA column, 90:10 Hexanes:*iso*-propanol, 1.0 ml/min,  $\text{RT}_{\text{minor}} = 14.23$  min,  $\text{RT}_{\text{major}} = 15.84$  min, 210 nm.  $^1\text{H}$  NMR (400 MHz,  $\text{CDCl}_3$ ):  $\delta$  6.91 (dd,  $J = 2.8, 10.4$  Hz, 1H), 6.37 (s,

1H), 6.13 (d,  $J = 10.4$  Hz, 1H), 5.98 (s, 1H) 4.39 (q,  $J = 2.9$  Hz, 1H), 2.79-2.76 (m, 2H), 2.39 (s, 3H), 1.42 (s, 3H);  $^{13}\text{C}$  NMR (100 MHz,  $\text{CDCl}_3$ ):  $\delta$  194.2, 170.4, 158.1, 129.8, 99.8, 97.6, 40.7, 20.6, 12.2; IR (NaCl, neat): 3142, 2983, 2903, 1682, 1604, 1496, 1347, 1232, 1173, 1087, 1041, 900,  $\text{cm}^{-1}$ ; HRMS (ESI-APCI)  $m/z$  calcd  $[\text{C}_{12}\text{H}_{14}\text{NO}_5]^+$  ( $[\text{M} + \text{H}]^+$ ): calcd 252.0866, found 252.0866.

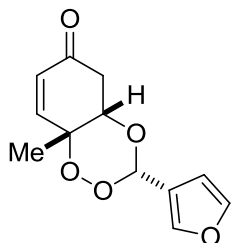

**(3S,4aS,8aR)-3-(furan-3-yl)-8a-methyl-4a,5-dihydrobenzo[e][1,2,4]trioxin-6(8aH)-one (4ap).** Prepared according to the general procedure: 45% yield; 91% ee; clear oil;  $R_f = 0.36$  (60:40 hexanes:EtOAc);  $[\alpha]_D^{20} = -102.3$ ,  $c = 0.0046$  g/ml  $\text{CH}_2\text{Cl}_2$ ; HPLC analysis: Chiralcel IA column, 90:10 Hexanes:*iso*-propanol, 1.0 ml/min,  $\text{RT}_{\text{minor}} = 12.2$  min,  $\text{RT}_{\text{major}} = 14.1$  min, 210 nm.  $^1\text{H}$  NMR (400 MHz,  $\text{CDCl}_3$ ):  $\delta$  7.53-7.51 (m, 1H), 7.37 (t,  $J = 1.7$  Hz, 1H), 6.91 (dd,  $J = 2.8, 10.4$  Hz, 1H), 6.40-6.38 (m, 1H), 6.23 (s, 1H), 6.14 (dd,  $J = 0.8, 10.4$  Hz, 1H), 4.35 (q,  $J = 3.0$  Hz, 1H), 2.82 (ddd,  $J = 0.8, 3.0, 17.5$  Hz, 1H), 2.76 (dd,  $J = 3.0, 17.5$  Hz, 1H), 1.41 (s, 3H);  $^{13}\text{C}$  NMR (100 MHz,  $\text{CDCl}_3$ ):  $\delta$  194.6, 150.8, 141.9, 129.8, 119.7, 108.4, 99.83, 78.0, 76.8, 40.9, 20.6; IR (NaCl, neat): 3148, 2892, 1681, 1604, 1504, 1344, 1160, 1064, 986, 876, 811  $\text{cm}^{-1}$ ; HRMS (ESI-APCI)  $m/z$  calcd  $[\text{C}_{12}\text{H}_{13}\text{O}_5]^+$  ( $[\text{M} + \text{H}]^+$ ): calcd 237.0757, found 237.0753.

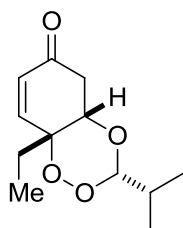

**(3S,4aS,8aR)-8a-ethyl-3-isopropyl-4a,5-dihydrobenzo[e][1,2,4]trioxin-6(8aH)-one (2cb).** Prepared according to the general procedure: 79% yield; >20:1 dr; 96% ee; clear oil;  $R_f = 0.36$  (80:20 Hexanes:EtOAc);  $[\alpha]_D^{20} = -57.7$ ,  $c = 0.0034$  g/ml  $\text{CH}_2\text{Cl}_2$ ; HPLC analysis: Chiralcel IA column, 99:1 Hexanes:*iso*-propanol, 1.0 ml/min,  $\text{RT}_{\text{minor}} = 13.10$  min,  $\text{RT}_{\text{major}} = 15.71$  min, 210 nm.  $^1\text{H}$  NMR (400 MHz,  $\text{CDCl}_3$ ):  $\delta$  6.90 (dd,  $J = 10.5, 2.7$  Hz, 1H), 6.10 (d,  $J = 10.5$  Hz, 1H), 4.98 (d,  $J = 5.4$  Hz, 1H), 4.20 (q,  $J = 3$  Hz, 1H), 2.69 (d,  $J = 3$  Hz, 2H), 1.63-1.88 (m, 3H), 1.00 (t,  $J = 7.5$  Hz, 3H), 0.88 (d,  $J = 6.9$  Hz, 6H);  $^{13}\text{C}$  NMR (100 MHz,  $\text{CDCl}_3$ ):  $\delta$  195.2, 150.7, 129.9, 107.0, 79.8, 75.2, 40.8, 30.9, 28.6, 16.64, 16.62, 7.1; IR (NaCl, neat): 2972, 2941, 2881, 1689, 1463, 1389, 1194, 1159, 957, 665  $\text{cm}^{-1}$ ; HRMS (ESI-APCI)  $m/z$  calcd  $[\text{C}_{12}\text{H}_{19}\text{O}_4]^+$  ( $[\text{M} + \text{H}]^+$ ): 227.1278, found 227.1275.

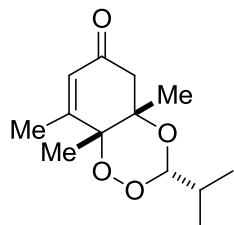

**(3S,4aS,8aR)-3-isopropyl-4a,8,8a-trimethyl-4a,5-dihydrobenzo[e][1,2,4]trioxin-6(8aH)-one (2cc).** Prepared according to the general procedure: 63% yield; 90% ee; white solid;  $R_f = 0.50$  (67:33 Hexanes:EtOAc);  $[\alpha]_D^{20} = -67.6$ ,  $c = 0.0011$  g/ml  $\text{CH}_2\text{Cl}_2$ ; HPLC analysis: Chiralcel IC column, 97:3 Hexanes:*iso*-propanol, 1.0 ml/min,  $\text{RT}_{\text{minor}} = 17.59$  min,  $\text{RT}_{\text{major}} = 21.30$  min, 210 nm.  $^1\text{H}$  NMR (400 MHz,  $\text{CDCl}_3$ ):  $\delta$  5.94-5.92 (m, 1H), 5.21 (d,  $J = 4.5$  Hz, 1H), 2.61 (d,  $J = 17.1$  Hz, 1H), 2.50 (d,  $J = 17.0$  Hz, 1H), 2.04 (s, 3H), 1.77-1.60 (m, 1H), 1.44, (s, 3H), 1.20, (s,

3H) 0.81 (dd,  $J = 1.1, 6.9$  Hz, 6H);  $^{13}\text{C NMR}$  (100 MHz,  $\text{CDCl}_3$ ):  $\delta$  195.1, 161.7, 127.8, 101.4, 82.3, 75.6, 48.0, 30.9, 19.0, 18.29, 18.27, 16.39, 16.28; **IR** (NaCl, neat): 2968, 2933, 2880, 1677, 1460, 1393, 1282, 1081, 957  $\text{cm}^{-1}$ ; **HRMS** (ESI-APCI)  $m/z$  calcd  $[\text{C}_{13}\text{H}_{21}\text{O}_4]^+$  ( $[\text{M} + \text{H}]^+$ ): 241.1434, found 241.1434.

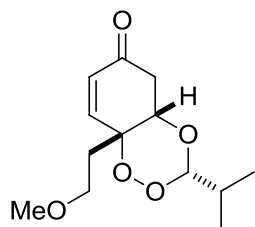

**(3S,4aS,8aR)-3-isopropyl-8a-(2-methoxyethyl)-4a,5-dihydrobenzo[e][1,2,4]trioxin-6(8aH)-one (2cd)**. Prepared according to the general procedure: 66% yield; >20:1 dr; 96% ee; clear oil;  $R_f = 0.21$  (67:33 Hexanes:EtOAc);  $[\alpha]_D^{20} = -86.2$ ,  $c = 0.0021$  g/ml  $\text{CH}_2\text{Cl}_2$ ; HPLC analysis: Chiralcel IA column, 95:5 Hexanes:iso-propanol, 1.0 ml/min,  $\text{RT}_{\text{minor}} = 7.78$  min,  $\text{RT}_{\text{major}} = 12.69$  min, 210 nm.  $^1\text{H NMR}$  (400 MHz,  $\text{CDCl}_3$ ):  $\delta$  6.85 (dd,  $J = 10.4, 2.8$  Hz, 1H), 6.05 (dd,  $J = 10.4$  Hz, 0.9 Hz 1H), 4.97 (d,  $J = 5.1$  Hz, 1H), 4.27 (q,  $J = 2.9$  Hz, 1H), 3.50 (ddd,  $J = 5.6, 6.9, 9.8$  Hz, 1H), 3.43 (ddd,  $J = 5.6, 6.6, 9.8$  Hz, 1H), 3.28 (s, 3H), 2.75 (dd,  $J = 3.0, 17.6$  Hz, 1H), 2.65 (ddd,  $J = 1.0, 3.0, 17.6$  Hz, 2H), 1.99 (ddd,  $J = 5.6, 6.6, 15.0$  Hz, 1H), 1.88 (ddd,  $J = 5.6, 6.8, 15.0$  Hz, 1H), 1.80-1.76 (m, 1H), 0.86 (d,  $J = 7.0$  Hz, 6H);  $^{13}\text{C NMR}$  (100 MHz,  $\text{CDCl}_3$ ):  $\delta$  ; **IR** (NaCl, neat): 2968, 2929, 2879, 1687, 1473, 1392, 1191, 1116, 1082, 1015, 772  $\text{cm}^{-1}$ ; **HRMS** (ESI-APCI)  $m/z$  calcd  $[\text{C}_{13}\text{H}_{21}\text{O}_5]^+$  ( $[\text{M} + \text{H}]^+$ ): 257.1384, found 257.1357.

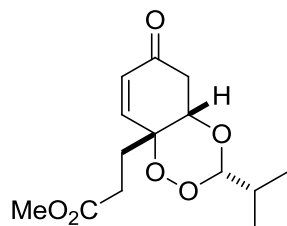

**methyl 3-((3S,4aS,8aR)-3-isopropyl-6-oxo-4a,5,6,8a-tetrahydrobenzo[e][1,2,4]trioxin-8a-yl)propanoate (2ce)**. Prepared according to the general procedure: 67% yield; 95% ee; clear oil;  $R_f = 0.40$  (67:33 Hexanes:EtOAc);  $[\alpha]_D^{20} = -104.0$ ,  $c = 0.0037$  g/ml  $\text{CH}_2\text{Cl}_2$ ; HPLC analysis: Chiralcel IA column, 80:20 Hexanes:iso-propanol, 1.0 ml/min,  $\text{RT}_{\text{minor}} = 7.38$  min,  $\text{RT}_{\text{major}} = 13.80$  min, 210 nm.  $^1\text{H NMR}$  (400 MHz,  $\text{CDCl}_3$ ):  $\delta$  6.83 (dd,  $J = 10.5, 2.8$  Hz, 1H), 6.09 (d,  $J = 10.5$  Hz, 1H), 4.97 (d,  $J = 5.1$  Hz, 1H), 4.16 (d,  $J = 2.9$  Hz, 1H), 3.66 (s, 3H), 2.75 (dd,  $J = 17.7, 3.1$  Hz, 1H), 2.68 (dd,  $J = 17.7, 3.0$  Hz, 1H), 2.52 (ddd,  $J = 6.2, 9.9, 16.4$  Hz, 1H), 2.40 (ddd,  $J = 6.1, 9.9, 16.1$  Hz, 1H), 2.10 (ddd,  $J = 6.0, 9.9, 14.8$  Hz, 1H), 2.00 (ddd,  $J = 6.2, 9.9, 14.8$  Hz, 1H), 1.80-1.67 (m, 1H), 0.86 (d,  $J = 6.9$  Hz, 6H);  $^{13}\text{C NMR}$  (100 MHz,  $\text{CDCl}_3$ ):  $\delta$  194.7, 172.7, 149.1, 130.5, 107.0, 78.8, 75.1, 51.9, 40.7, 30.8, 27.1, 16.59, 16.51; **IR** (NaCl, neat): 2969, 2880, 1738, 1688, 1439, 1260, 1175, 1083, 1016, 794  $\text{cm}^{-1}$ ; **HRMS** (ESI-APCI)  $m/z$  calcd  $[\text{C}_{14}\text{H}_{21}\text{O}_6]^+$  ( $[\text{M} + \text{H}]^+$ ): 285.1333, found 285.1318.

### Trioxane Derivatives.

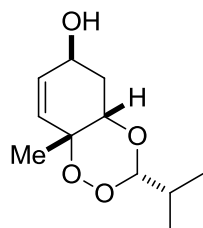

**3-isopropyl-8a-methyl-4a,5,6,8a-tetrahydrobenzo[e][1,2,4]trioxin-6-ol (9s)**. Trioxane **4ac** (233 mg, 1.1 mmol, 1 eq) was added to a solution of  $\text{CeCl}_3 \cdot (\text{H}_2\text{O})_7$  (450 mg, 1.2 mmol, 1.1 eq) in 3.5 mL of methanol (0.3M). After the mixture was cooled to 0 °C,  $\text{NaBH}_4$  was added portionwise. The reaction was stirred at 0 °C for 1 h and then for an 1 h at room temperature. The reaction was quenched with sat.  $\text{NH}_4\text{Cl}$  and the aqueous layer was extracted using EtOAc. The organic extracts were dried with  $\text{MgSO}_4$  and concentrated *in vacuo*. Column chromatography on  $\text{SiO}_2$  with 25% (hexanes:ethyl acetate) of the residue gave analytically pure **9s** as a clear oil. 96% yield; 4:1 dr; clear oil;

$R_f$  (major) = 0.29 (67:33 Hexanes:EtOAc);  $^1\text{H NMR}$  (400 MHz,  $\text{CDCl}_3$ ):  $\delta$  5.87 (dt,  $J = 1.9, 10.4$  Hz, 1H), 5.70 (dt  $J = 2.2, 10.4$  Hz, 1H), 4.94 (d,  $J = 4.9$  Hz, 1H), 4.53 (ddt,  $J = 2.1, 5.9, 8.1$  Hz, 1H), 3.9 (dt,  $J = 1.9, 4.2$  Hz, 1H), 2.43 (dddd,  $J = 1.7, 4.4, 6.0, 13.5$  Hz, 1H), 1.81-1.70 (m, 2H), 1.63 (bs, 1H), 1.19 (s, 3H), 0.90 (dd,  $J = 1.9, 6.9$  Hz, 6H);  $^{13}\text{C NMR}$  (100 MHz,  $\text{CDCl}_3$ ):  $\delta$  133.0, 131.1, 106.4, 77.2, 75.8, 64.7, 36.1, 31.0, 22.5, 16.70, 16.68; **IR** (NaCl, neat): 3364, 3030, 2968, 2936, 2877, 1471, 1395, 1171, 1079, 896  $\text{cm}^{-1}$ ; **HRMS** (ESI-APCI)  $m/z$  calcd  $[\text{C}_{12}\text{H}_{21}\text{O}_4]^+$  229.1434 ( $[\text{M} - \text{OH} + \text{HOCH}_3]^+$ ): 229.1434, found 229.1428.

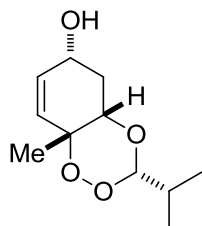

$R_f$  (minor) = 0.51 (67:33 Hexanes:EtOAc);  $^1\text{H NMR}$  (400 MHz,  $\text{CDCl}_3$ ):  $\delta$  6.03 (ddd,  $J = 1.7, 4.7, 10.2$  Hz, 1H), 5.75 (dd,  $J = 1.7, 10.2$  Hz, 1H), 4.93 (d,  $J = 5.2$  Hz, 1H), 4.04-3.97 (bm, 1H), 3.99 (dt,  $J = 2.0, 4.0$  Hz, 1H), 2.96 (bd,  $J = 10.2$  Hz, 1H), 2.28 (ddt,  $J = 1.6, 3.9, 15.3$  Hz, 1H), 2.06 (ddd,  $J = 1.9, 5.2, 15.3$  Hz, 1H), 1.86-1.73 (m, 1H), 1.10 (s, 3H), 0.92 (d,  $J = 6.9$  Hz, 6H);  $^{13}\text{C NMR}$  (100 MHz,  $\text{CDCl}_3$ ):  $\delta$  131.5, 130.8, 107.3, 77.8, 75.2, 62.4, 32.9, 30.9, 21.4, 17.00, 16.92; **IR** (NaCl, neat): 3557, 3033, 2970, 2935, 2879, 1472, 1409, 1369, 1171, 1073, 895, 809  $\text{cm}^{-1}$ ; **HRMS** (ESI-APCI)  $m/z$  calcd  $[\text{C}_{12}\text{H}_{21}\text{O}_4]^+$  229.1434 ( $[\text{M} - \text{OH} + \text{HOCH}_3]^+$ ): 229.1434, found 229.1429.

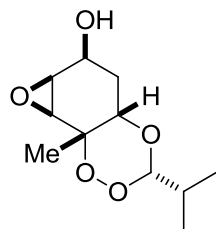

**3-isopropyl-7b-methylhexahydrooxireno[2',3':3,4]benzo[1,2-e][1,2,4]trioxin-6-ol (9).** To a solution of **9s** (43 mg, 0.2 mmol, 1 eq) dissolved in 2 mL of dichloromethane (0.1M) at 0 °C was added *m*-chloroperoxybenzoic (92 mg, (75% pure), 0.4 mmol, 2 eq) The reaction was stirred at 0 °C for 1 hour and then allowed to stir at room temperature for 4 hours. The reaction mixture was concentrated *in vacuo* and purified using column chromatography on  $\text{SiO}_2$  with 20% (hexanes:ethyl acetate) to afford analytically pure **9s** as a white solid.: 91% yield; white solid;  $R_f = 0.27$  (67:33 Hexanes:EtOAc);  $^1\text{H NMR}$  (400 MHz,  $\text{CDCl}_3$ ):  $\delta$  4.92 (d,  $J = 4.7$  Hz, 1H), 4.41 (ddd,  $J = 1.2, 5.9, 10.4$  Hz, 1H), 3.64 (d,  $J = 5.3$  Hz, 1H), 3.49-3.46 (m, 2H), 2.11 (dt,  $J = 5.7, 13.6$  Hz, 1H), 1.85-1.74 (m, 1H), 1.71 (s, 1H), 1.39 (ddd,  $J = 1.1, 10.4, 13.6$  Hz, 1H), 1.21 (s, 3H), 0.92 (d,  $J = 6.9$  Hz, 6H);  $^{13}\text{C NMR}$  (100 MHz,  $\text{CDCl}_3$ ):  $\delta$  106.0, 75.6, 74.8, 65.2, 59.3, 55.9, 31.1, 29.6, 18.3, 16.62, 16.47; **IR** (NaCl, neat): 3407, 2970, 2939, 2878, 1462, 1396, 1268, 1184, 1089, 1001, 939, 874, 820, 672  $\text{cm}^{-1}$ ; **HRMS** (ESI-APCI)  $m/z$  calcd  $[\text{C}_{11}\text{H}_{22}\text{NO}_5]^+$  ( $[\text{M} + \text{NH}_4]^+$ ): calcd 248.1492, found 248.1438.

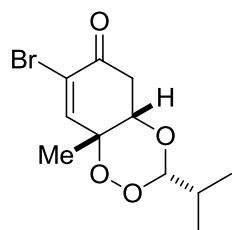

**7-bromo-3-isopropyl-8a-methyl-4a,5-dihydrobenzo[e][1,2,4]trioxin-6(8aH)-one (10).** To a solution of **4ac** (238 mg, 1.12 mmol, 1 eq) in 8 mL  $\text{CCl}_4$  (0.14M) at 0 °C was added  $\text{Br}_2$  (75  $\mu\text{L}$ , 1.46 mmol, 1.3 eq). The reaction was allowed to stir for 30 minutes at 0 °C and then 0.5 mL of  $\text{NEt}_3$  was added and the reaction was warmed to room temperature. The reaction mixture was concentrated *in vacuo* and purified using column chromatography on  $\text{SiO}_2$  with 15% (hexanes:ethyl acetate) to afford analytically pure **10** as an off white solid (245 mg, 0.84 mmol). Note: The dibromide intermediate can be isolated in 4:1 dr if no  $\text{NEt}_3$  is added. 75% yield; off white solid;  $R_f = 0.28$  (80:20 Hexanes:EtOAc);  $^1\text{H}$

**NMR** (400 MHz, CDCl<sub>3</sub>): δ 7.29 (d, *J* = 2.6 Hz, 1H), 5.01 (d, *J* = 5.1 Hz, 1H), 4.17 (q, *J* = 2.9 Hz, 1H), 2.95 (dd, *J* = 3.1, 17.3 Hz, 1H), 2.78 (dd, *J* = 2.9, 17.3 Hz, 1H), 1.84-1.71 (m, 1H), 1.37 (s, 3H), 0.88 (dd, *J* = 1.6, 7.0 Hz, 6H); **<sup>13</sup>C NMR** (100 MHz, CDCl<sub>3</sub>): δ 187.2, 151.2, 123.7, 107.1, 79.6, 76.0, 40.5, 30.8, 20.2, 16.65, 16.50; **IR** (NaCl, neat): 3047, 2971, 2935, 2880, 1702, 1612, 1472, 1268, 1082, 1032, 968, 796, 687 cm<sup>-1</sup>; **HRMS** (ESI-APCI) *m/z* calcd [C<sub>11</sub>H<sub>19</sub>NO<sub>4</sub>Br]<sup>+</sup> ([M + NH<sub>4</sub>]<sup>+</sup>): calcd 308.0492, found 310.0484.

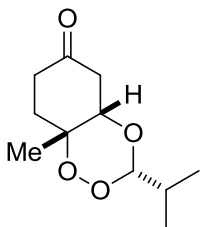

**3-isopropyl-8a-methyltetrahydrobenzo[e][1,2,4]trioxin-6(7H)-one (11).**

Trioxane **4ac** (51.4 mg, 0.242 mmol, 1 eq), 5% Rh/Al<sub>2</sub>O<sub>3</sub> (25 mg, 0.012 mmol, 0.05 eq) and PtO<sub>2</sub> (2.7 mg, 0.012, 0.05 eq) were placed in a round bottom flask and dissolved in 2.5 mL of ethyl acetate (0.1M). A balloon of H<sub>2</sub> was placed on the reaction vessel and it was stirred at room temperature for 1 h. The crude mixture was filtered through a plug of Celite and concentrated *in vacuo*. Column chromatography on SiO<sub>2</sub> with 15% (hexanes:ethyl acetate) of the residue gave analytically pure **11** as a clear oil. Note: If the reaction is left longer the trioxane will reduce to **12**. : 81% yield; clear oil; R<sub>f</sub> = 0.50 (67:33 Hexanes:EtOAc); **<sup>1</sup>H NMR** (400 MHz, CDCl<sub>3</sub>): δ 4.93 (d, *J* = 5.0 Hz), 3.96-3.93 (m, 1H), 3.00, (td, *J* = 5.8, 13.6 Hz, 1H), 2.64 (dd, *J* = 3.8, 15.9 Hz, 1H), 2.57-2.36 (m, 3H), 1.88-1.75 (m, 1H), 1.36 (s, 3H), 0.93 (d, *J* = Hz, 6H); **<sup>13</sup>C NMR** (100 MHz, CDCl<sub>3</sub>): δ 206.8, 107.9, 78.56, 78.24, 43.6, 37.7, 30.9, 28.1, 19.8, 16.72, 16.60; **IR** (NaCl, neat): 2970, 2879, 1717, 1472, 1219, 1144, 1079, 954 cm<sup>-1</sup>; **HRMS** (ESI-APCI) *m/z* calcd [C<sub>11</sub>H<sub>19</sub>O<sub>4</sub>]<sup>+</sup> ([M + H]<sup>+</sup>): 229.1434, found 229.1434.

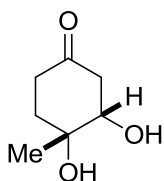

**3,4-dihydroxy-4-methylcyclohexanone (12).** To a solution of **11** (12.8 mg, 0.06 mmol, 1 eq) dissolved in 0.3 mL of acetic acid (0.2M), was added zinc dust (19.5 mg, 0.299 mmol, 5 eq). The solution was stirred for 6 h and then filtered through a pad of SiO<sub>2</sub> to afford the product as a clear oil in 75% yield. Notes: The reaction proceeds by reducing **11** to the dioxolane which is cleaved under acidic conditions to afford the diol. If **4ac** is

reacted under these conditions then *p*-cresol is the only product. 85% yield; clear oil; R<sub>f</sub> = 0.20 (50:50 Hexanes:EtOAc); **<sup>1</sup>H NMR** (400 MHz, CDCl<sub>3</sub>): δ 3.74 (dd, *J* = 14.7, 3.8 Hz, 1H), 2.70-2.53 (m, 2H), 2.56, (dd, *J* = 1.8, 5.7 Hz, 1H), 2.30-1.95 (bs, 2H), 2.25 (dddd, *J* = 14.7, 4.9, 4.9, 1.8 Hz, 1H), 2.11 (ddd, *J* = 14.0, 4.9, 1.2 Hz, 1H), 1.66 (dddd, *J* = 16.7, 14.0, 11.6, 5.1 Hz, 1H), 1.40 (s, 3H); **<sup>13</sup>C NMR** (100 MHz, CDCl<sub>3</sub>): δ 209.0, 74.5, 70.4, 46.0, 36.9, 33.9, 25.6; **IR** (NaCl, neat): 3414, 2970, 2933, 1709, 1417, 1260, 1129, 1066, 921cm<sup>-1</sup>; **HRMS** (ESI-APCI) *m/z* calcd [C<sub>7</sub>H<sub>9</sub>O<sub>2</sub>]<sup>-</sup> ([M - H]<sup>-</sup>): calcd 125.0608, found 125.0607.

## Mechanistic Studies

The reaction was carried out using the general procedure and it was monitored by chiral HPLC by taking aliquots from the reaction at 5 min, 1h, 6h, and 18 h. The ee of **8ac** was always 0% and the ee for **4ac** was 96% throughout the course of the reaction.

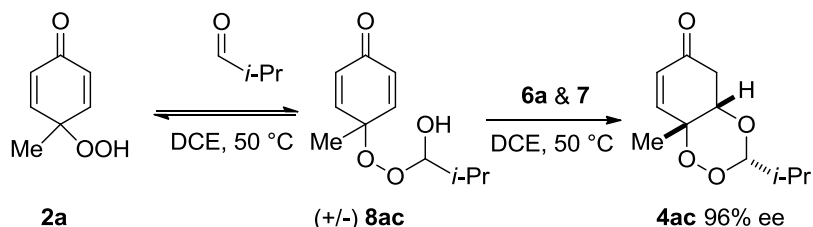

| Entry | Time  | ee <b>8ac</b> | ee <b>4ac</b> |
|-------|-------|---------------|---------------|
| 1     | 5 min | 0%            | > 92% trace   |
| 2     | 1 h   | 0%            | 96%           |
| 3     | 4 h   | 0%            | 96%           |
| 4     | 8 h   | 0%            | 96%           |
| 5     | 18 h  | trace         | 96%           |

HPLC analysis: Chiralcel IC column, 90:10 Hexanes:*iso*-propanol, 1.0 ml/min, 210nm. **4ac** (96% ee) RT<sub>minor</sub> = 8.33 min, RT<sub>major</sub> = 9.31 min, **8ac** (0% ee) RT = 10.11 min, RT = 11.69 min, **2a** RT = 20.00 min.

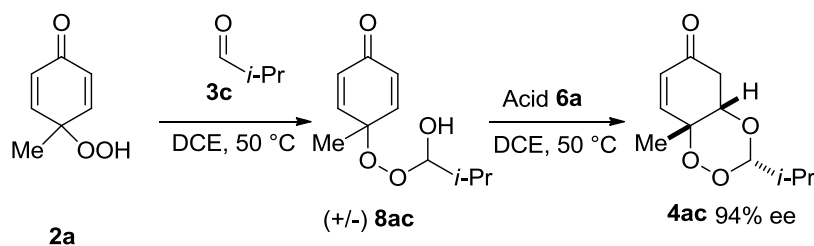

### 4-((1-hydroxy-2-methylpropyl)peroxy)-4-methylcyclohexa-2,5-dienone (**8ac**)

(+/-) **8ac** was synthesized by heating **2a** and **3c** in DCE at 50 °C. The reaction was concentrated *in vacuo* to remove any excess **3c**. **2a** was not removed because it co-elutes with (+/-) **8ac** and (+/-) **8ac** decomposes slowly on SiO<sub>2</sub>. (+/-) **8ac** was analyzed by chiral HPLC and found to be racemic. The mixture of (+/-) **8ac** and **2a** were subject to the standard reaction conditions and reaction went to complete conversion in 94% ee.

<sup>1</sup>H NMR (300 MHz, CDCl<sub>3</sub>): δ 6.96-6.84 (m, 2H), 6.11 (m, 2H), 4.88 (d, *J* = 5.8 Hz, 1H), 3.25 (bs, 1H), 1.77-1.68 (m, 1H), 1.37 (s, 3H), 0.89 (d, *J* = 6.9 Hz, 3H), 0.85 (d, *J* = 6.8 Hz, 3H).

## **Cell Lines and Conditions**

The D17 canine osteosarcoma cell line was obtained from American Type Culture Collection, (Manassas, VA). The M21 human melanoma cell line was generously provided by Dr. M. Albertini (University of Wisconsin-Madison). The human MDA-MB231 breast, A549 lung, and PC3 prostate carcinoma cell lines were generously provided by Dr. D. Gustafson (Colorado State University). All cells were grown in minimal essential medium supplemented with 5% heat-inactivated fetal bovine serum (HyClone, Logan, UT), 5% heat-inactivated newborn calf serum (HyClone), 100 units/ml penicillin-streptomycin (Mediatech, Herndon, VA), 2 mM L-glutamine (Mediatech), 1 mM sodium pyruvate (Mediatech), and 1X nonessential amino acid solution (Sigma, St. Louis, MO) at 37°C in a humidified atmosphere containing 5% CO<sub>2</sub>. All cell lines were serially passaged by trypsinization.

## **Growth Inhibition**

Stocks of artemisinin derivatives and synthetic trioxanes were stored in DMSO. Cells were plated at 2,000 cells/well in 200 µL medium in 96-well plates and allowed to adhere overnight. The plates were then washed and the medium replaced with medium containing varying concentrations of trioxane in quintuplicate. The final concentration of DMSO never exceeded 1%. After 72 h, the relative viable cell number was assessed using Alamar Blue™ (Promega, Madison, WI) according to the manufacturer's instructions. Relative fluorescence was expressed as a percentage of untreated cells and the IC<sub>50</sub> was then calculated for each cell line by nonlinear regression analysis fitting to a sigmoidal dose-response curve, using Prism v4.0b for Macintosh (GraphPad Software, Inc., San Diego, CA). For conditions where a regression curve could not be fit, IC<sub>50</sub> was estimated from the plotted growth inhibition curve.



# <sup>1</sup>H NMR and <sup>13</sup>C NMR Spectra of New Compounds

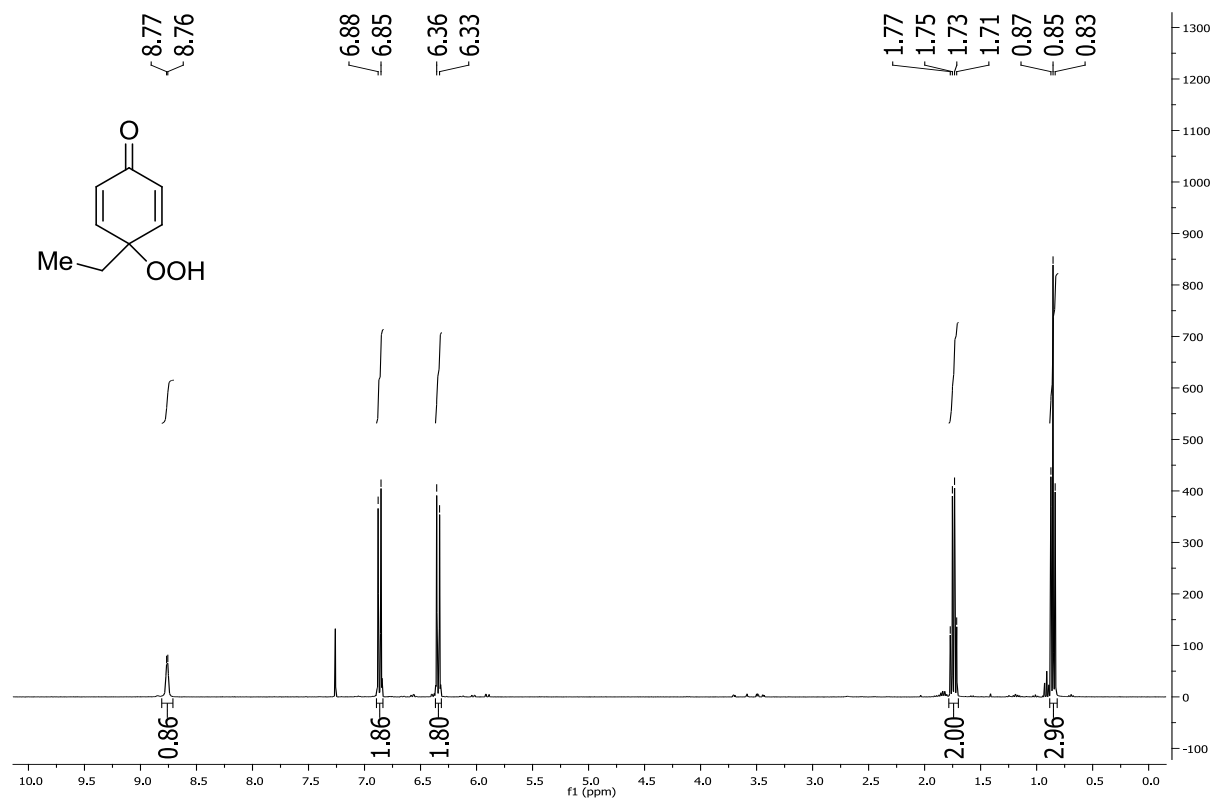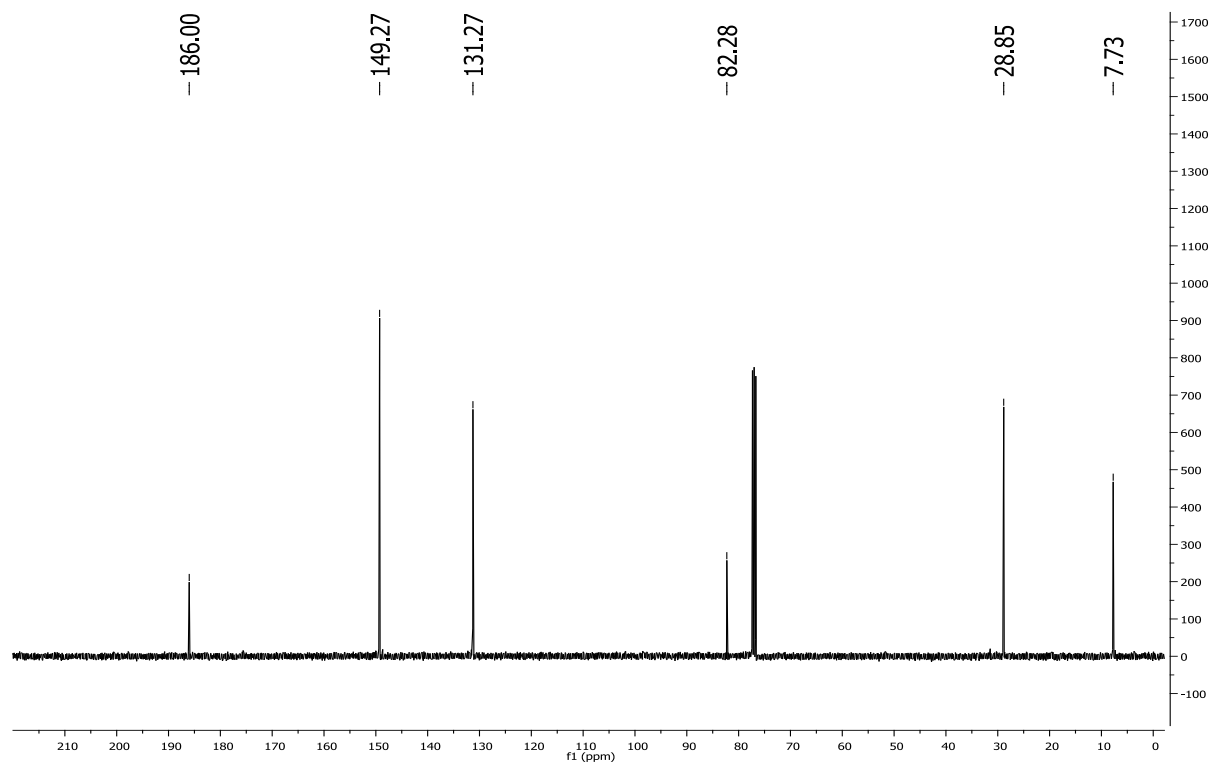

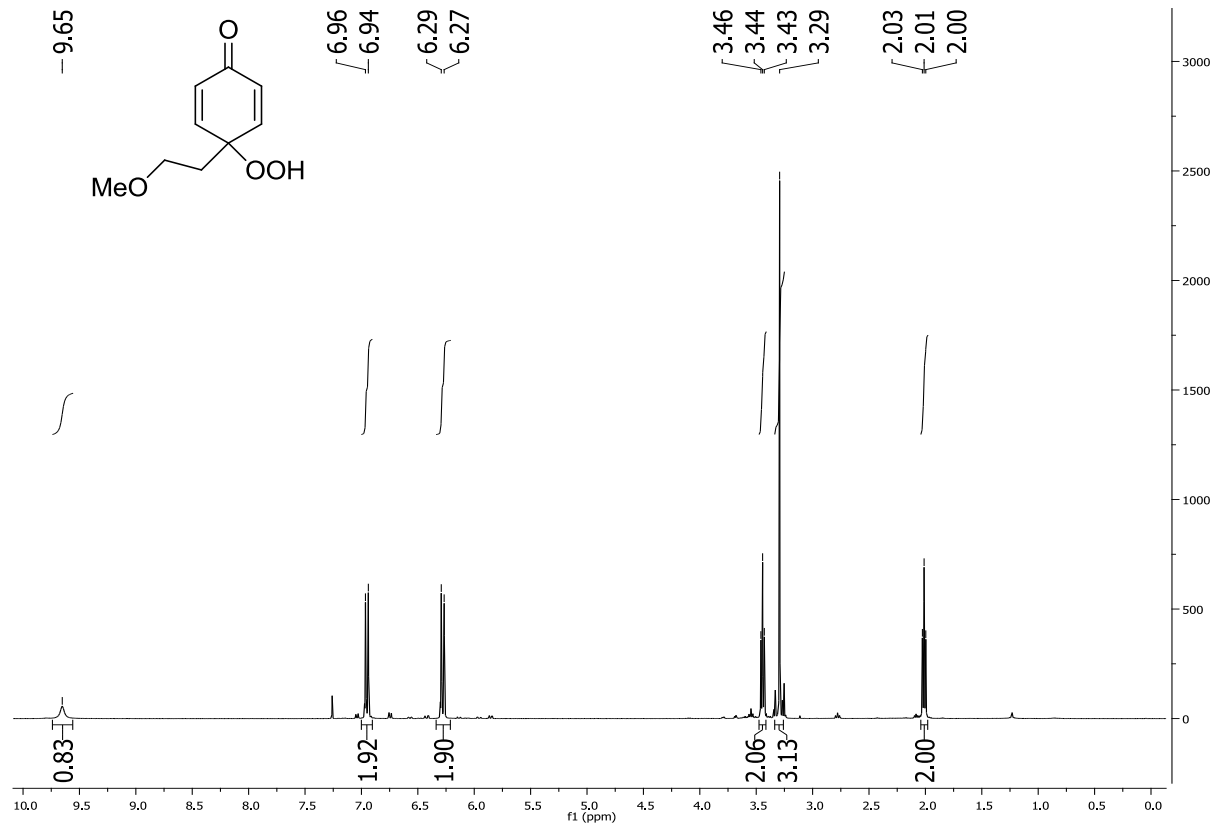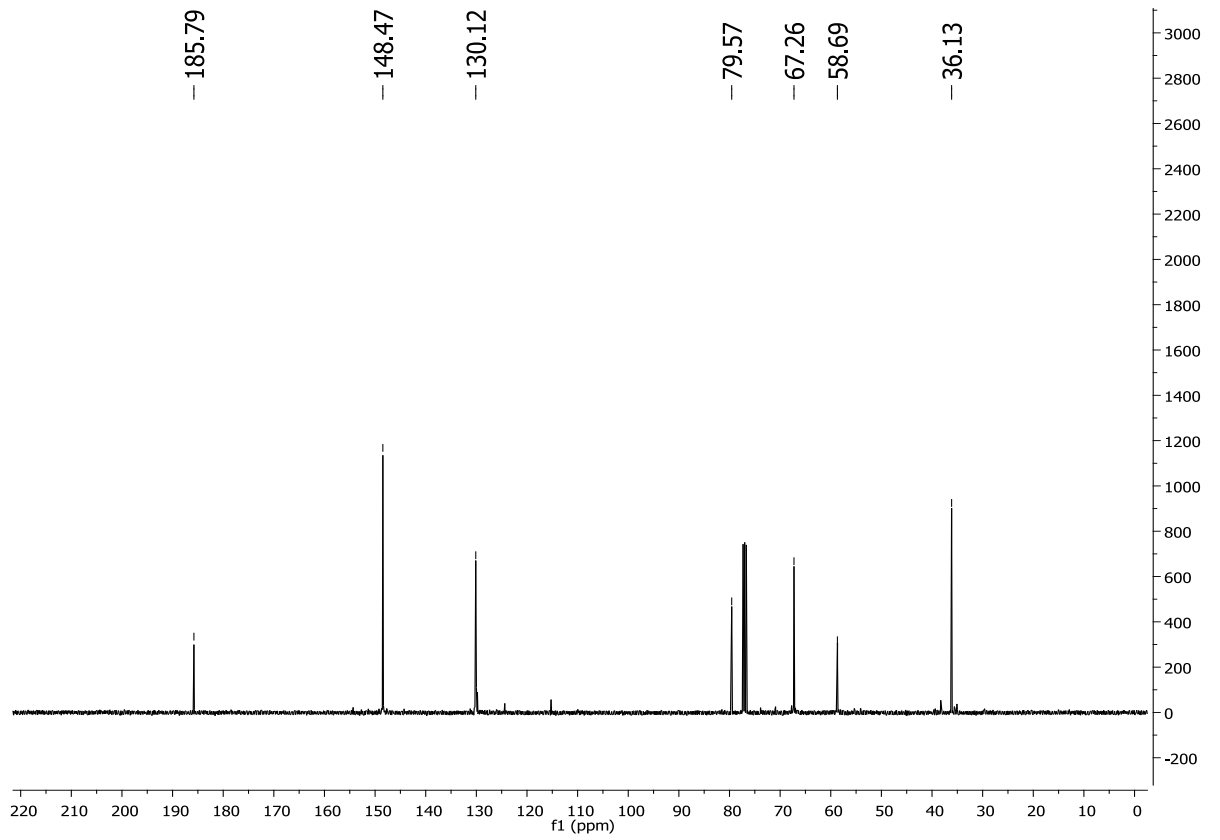

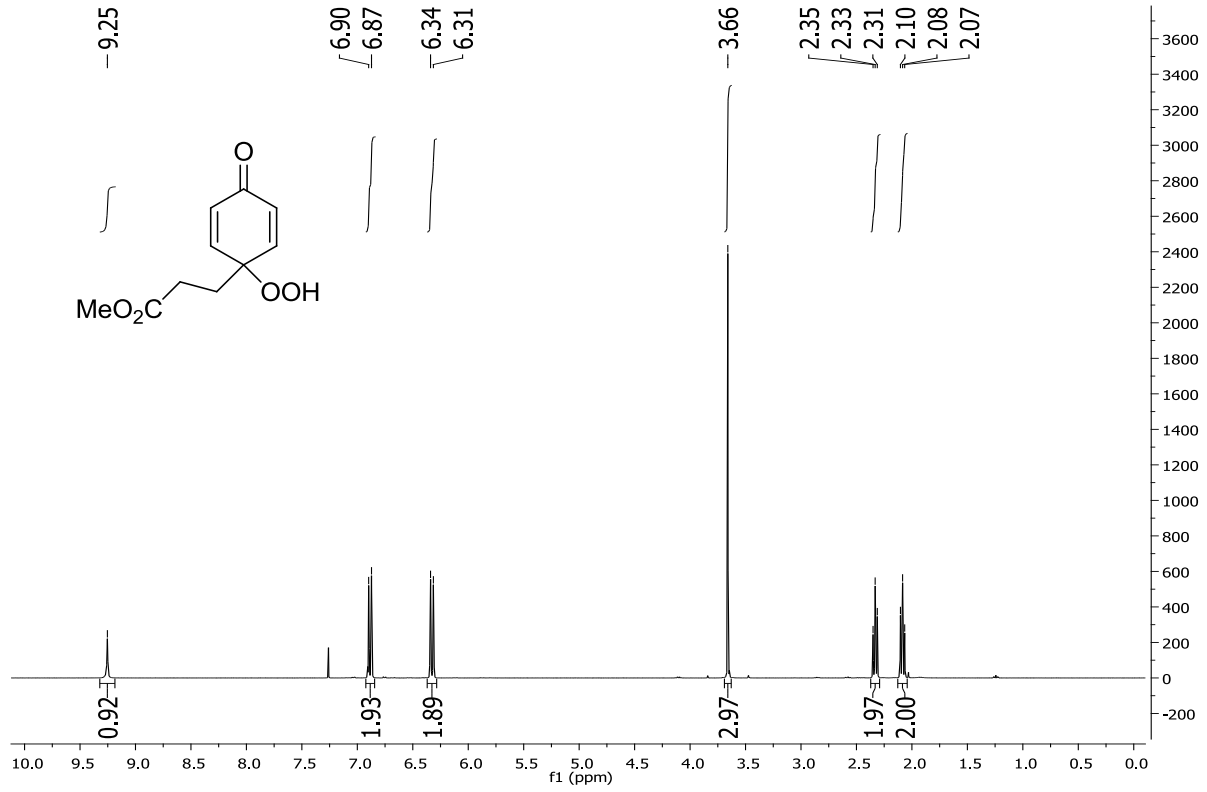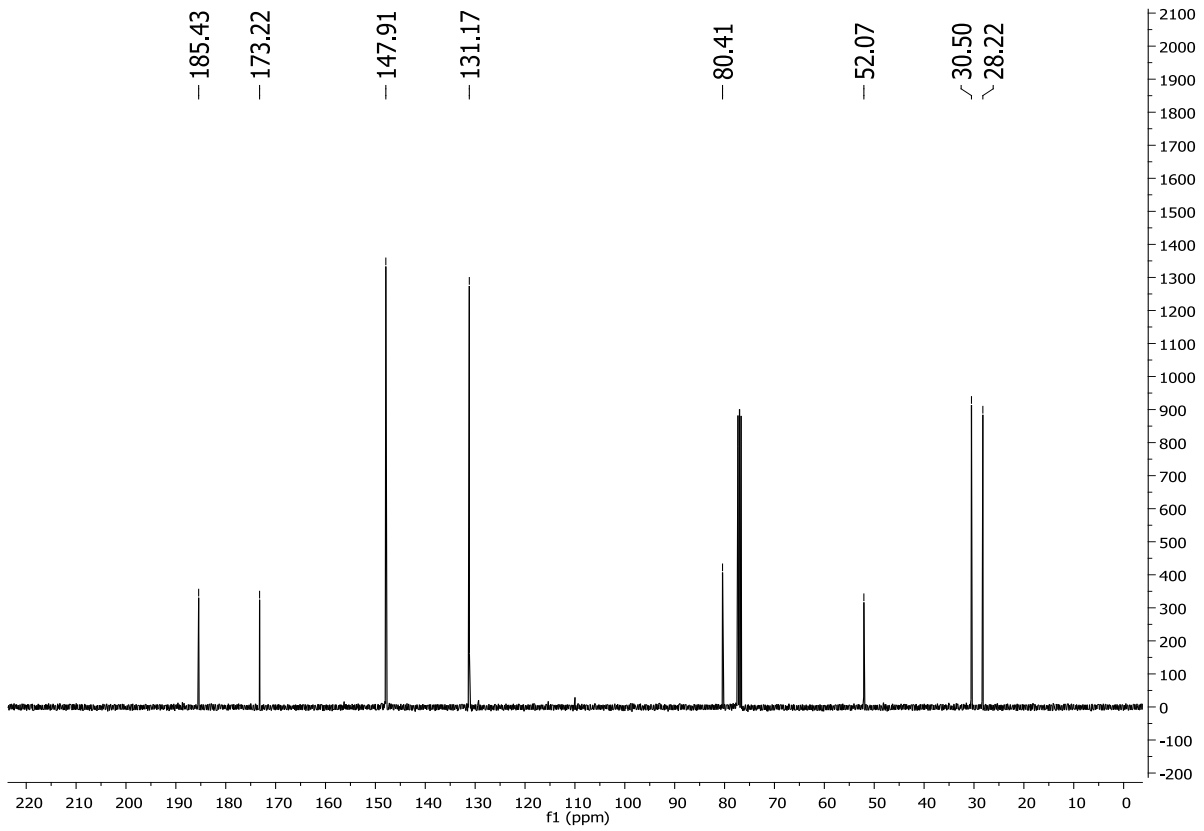

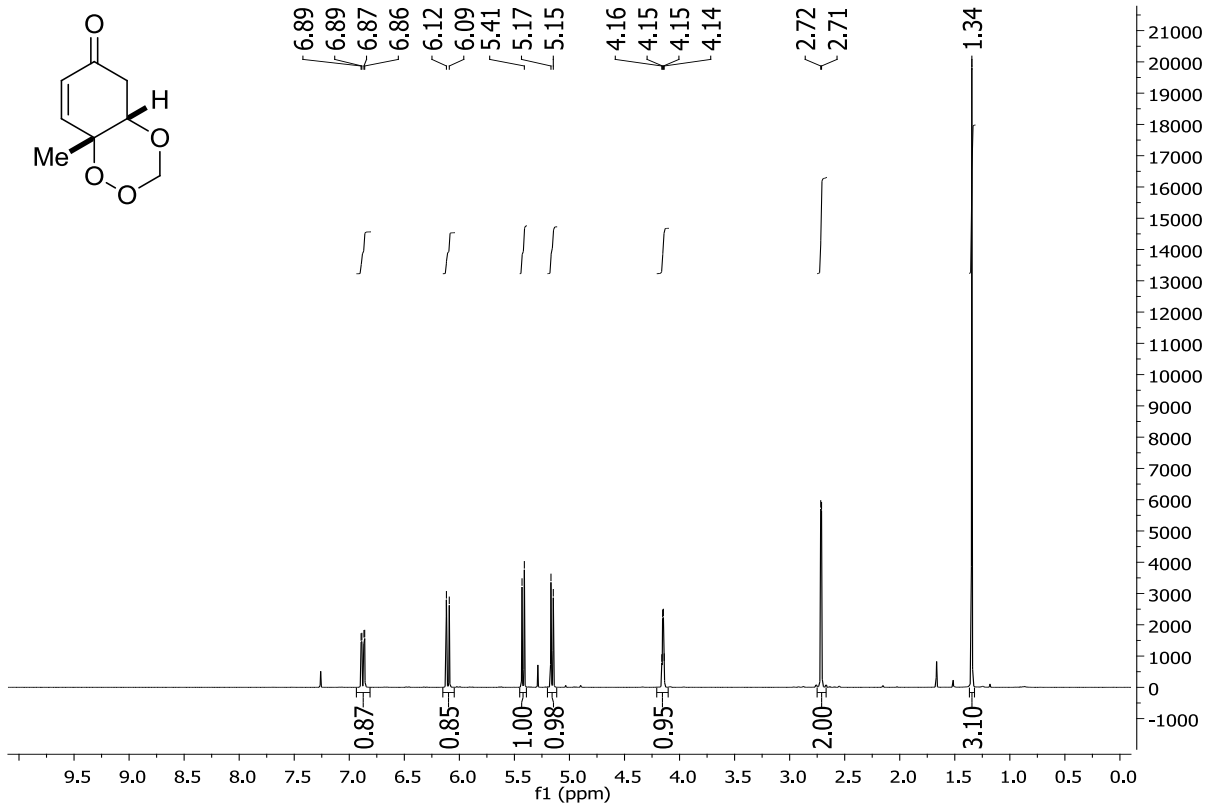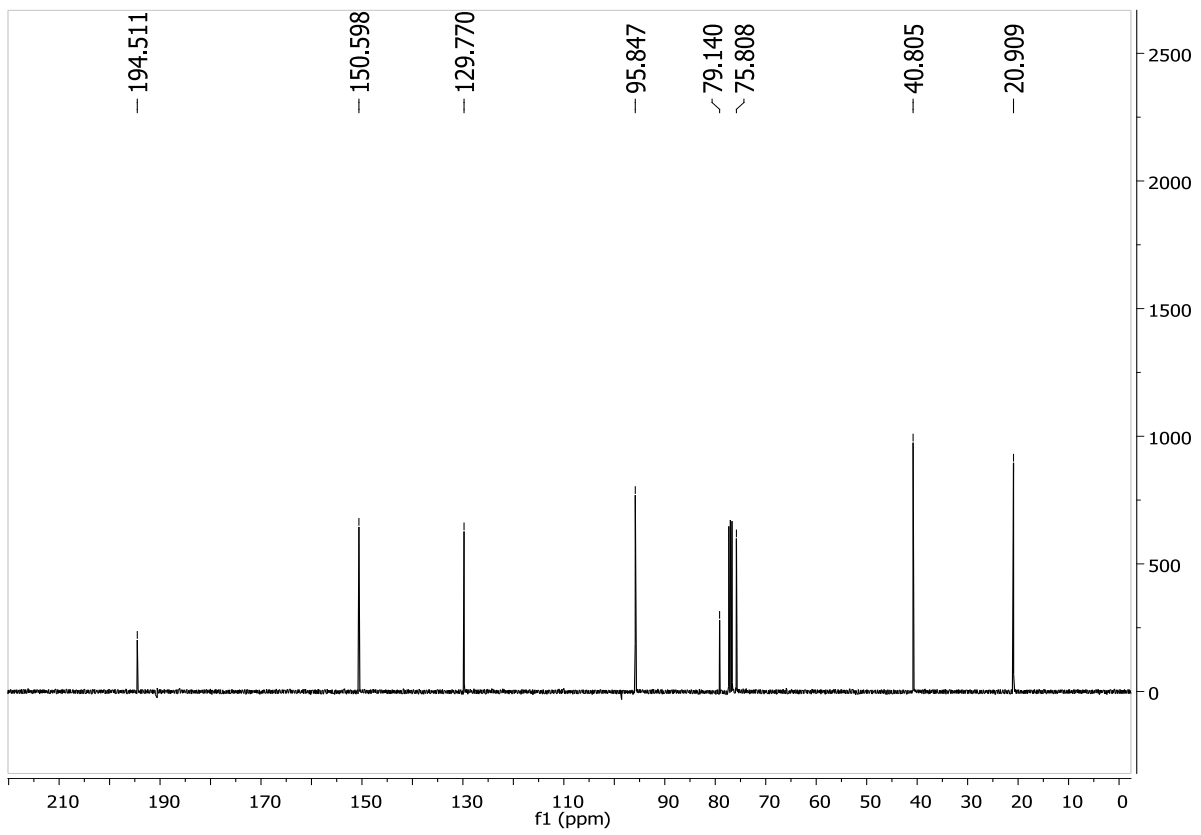

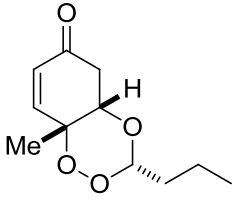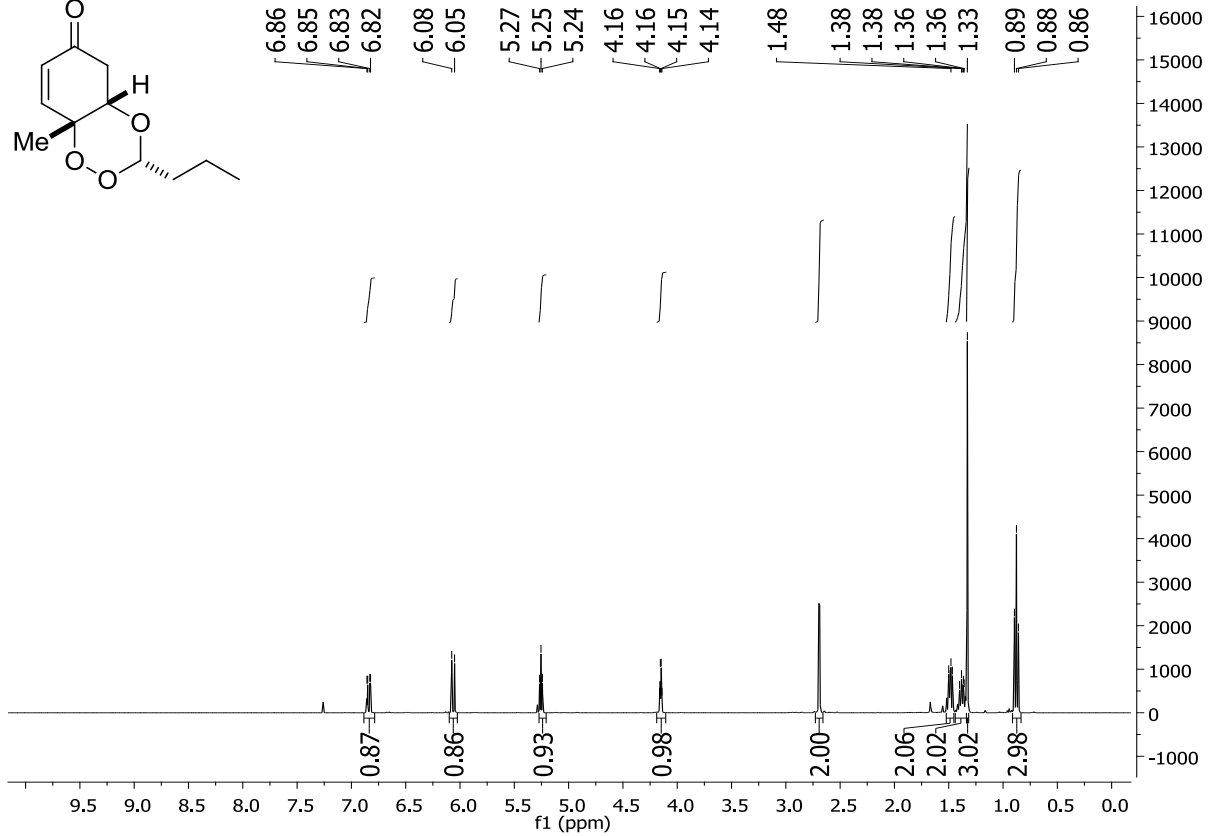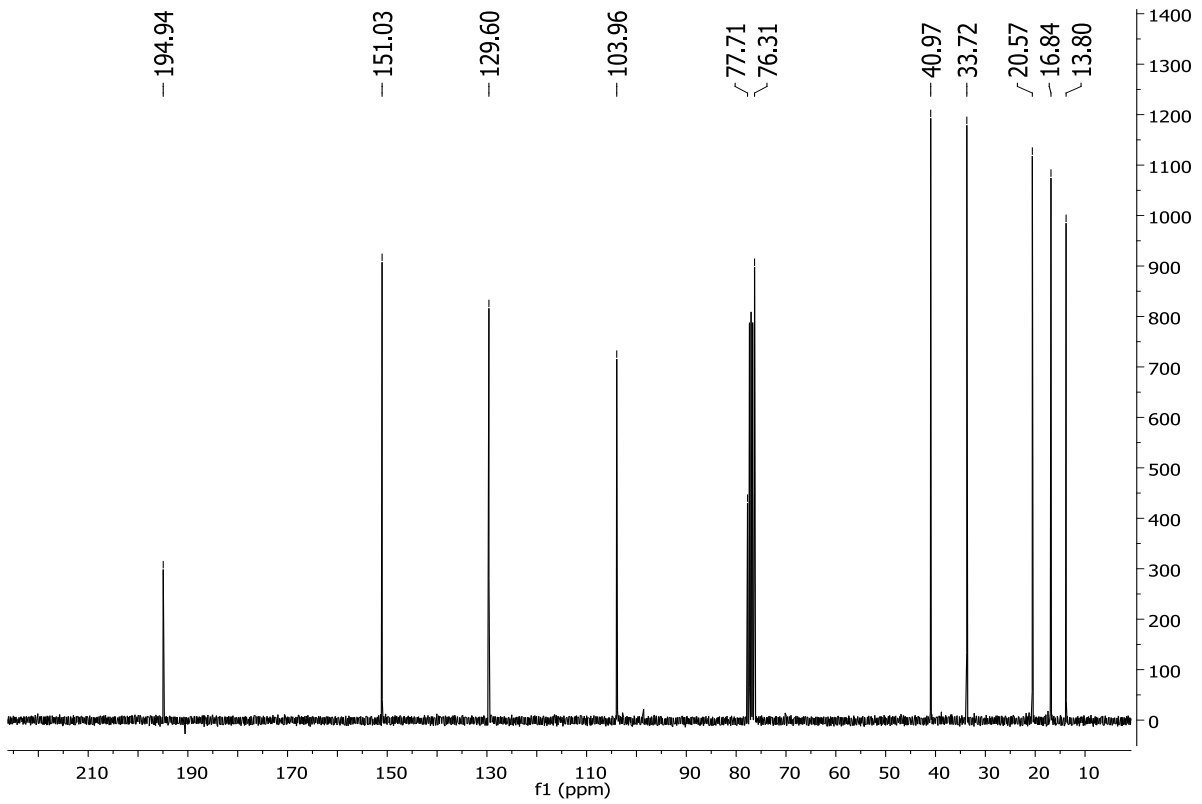

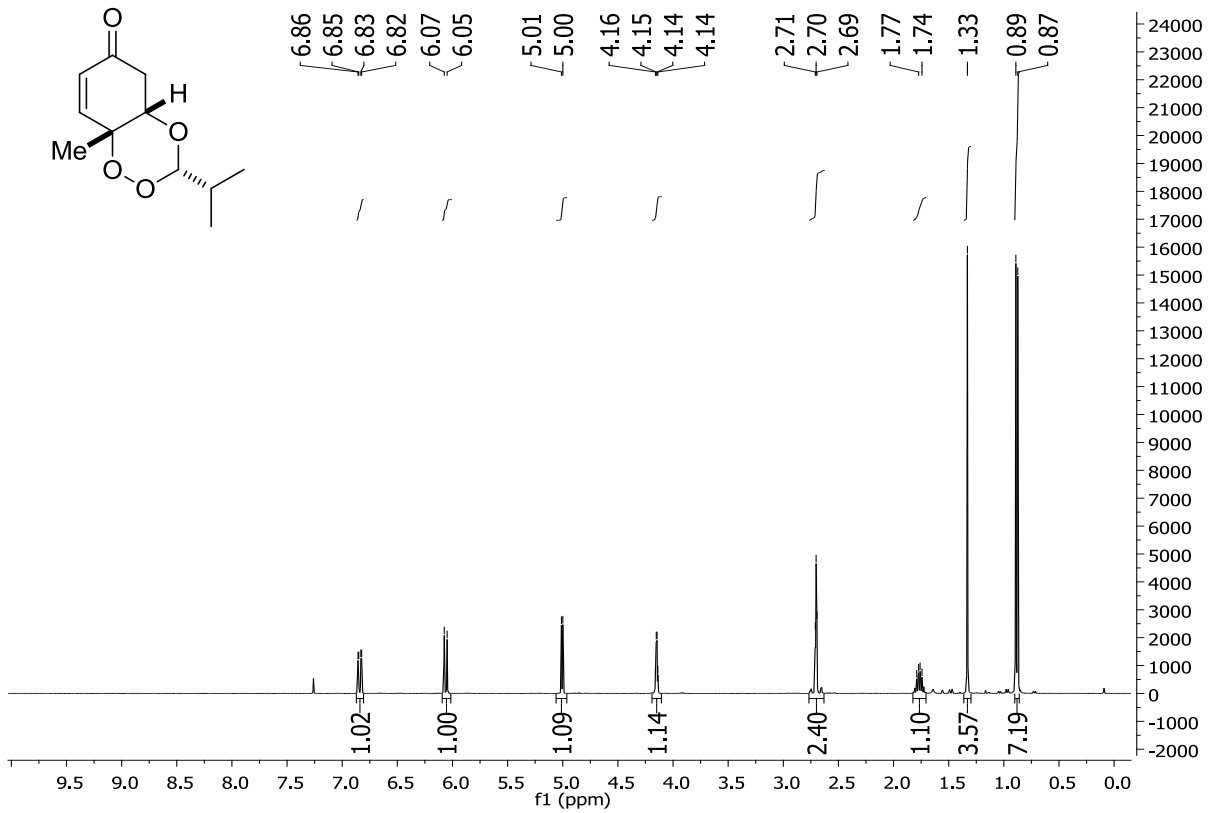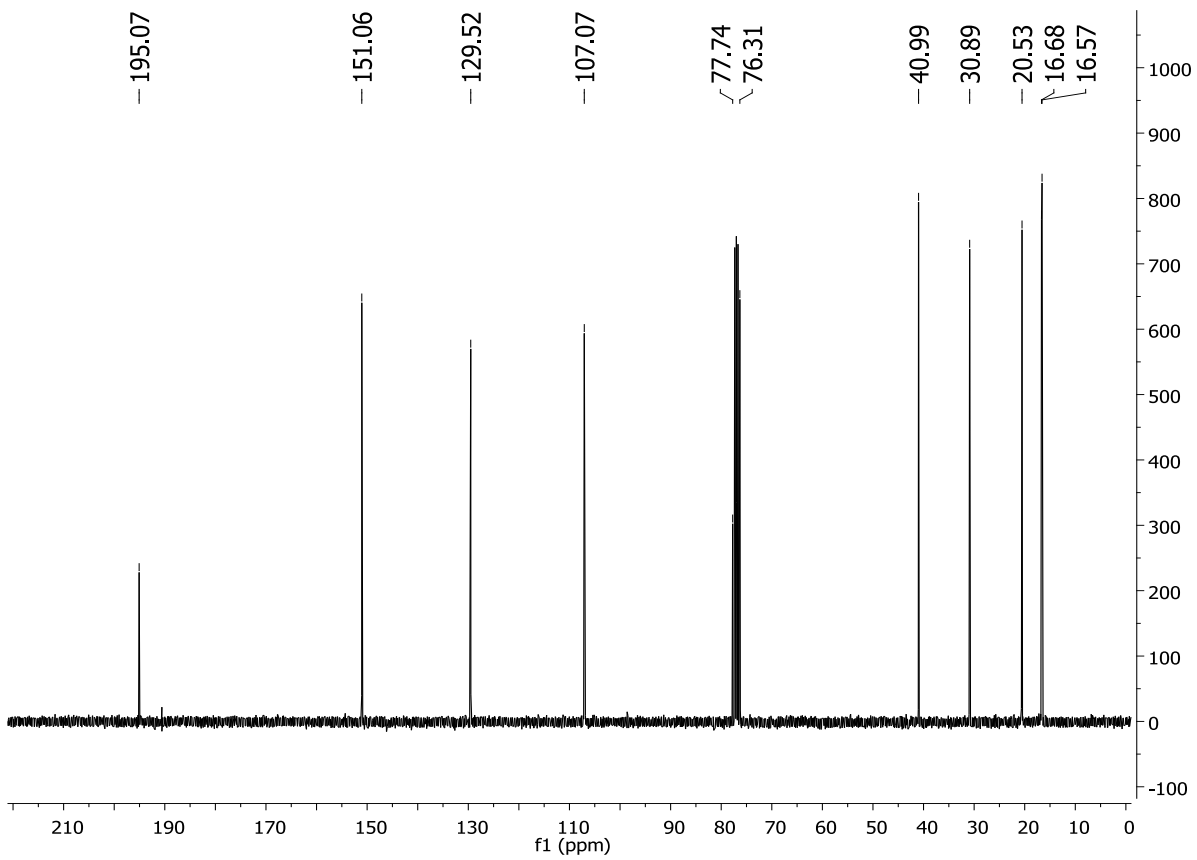

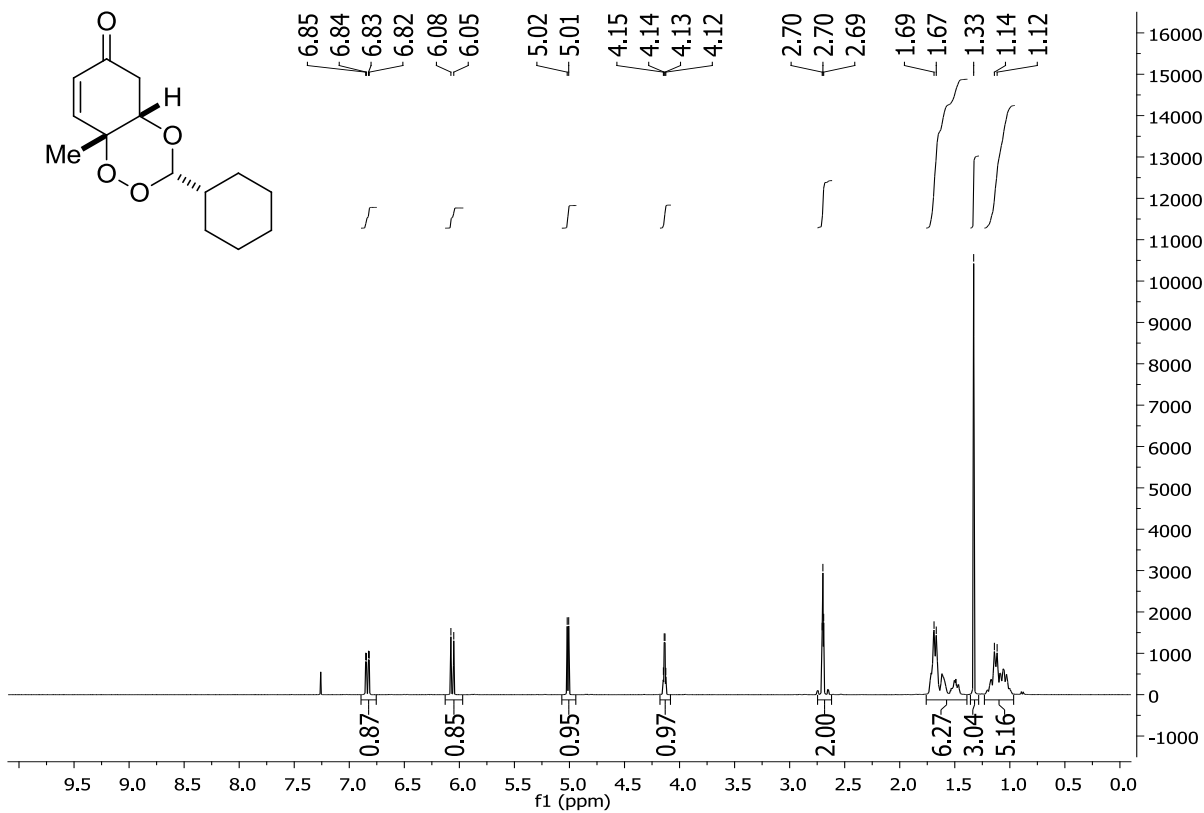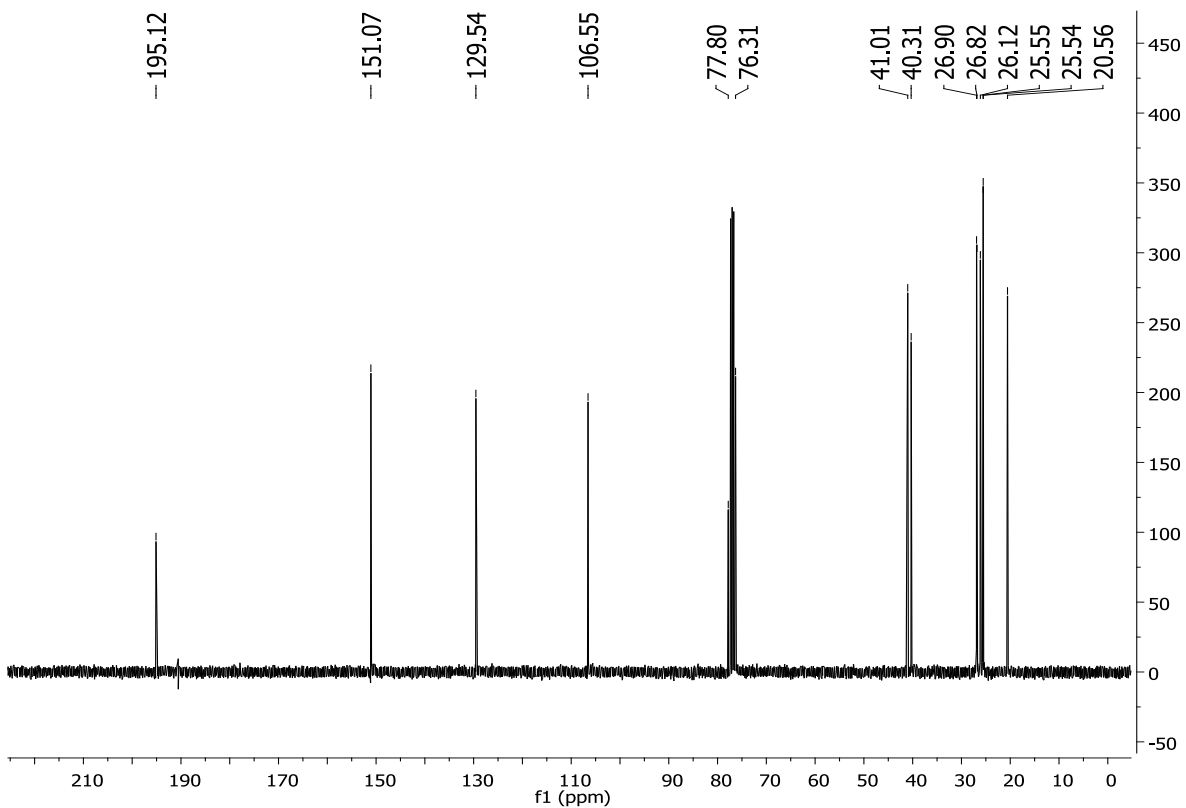

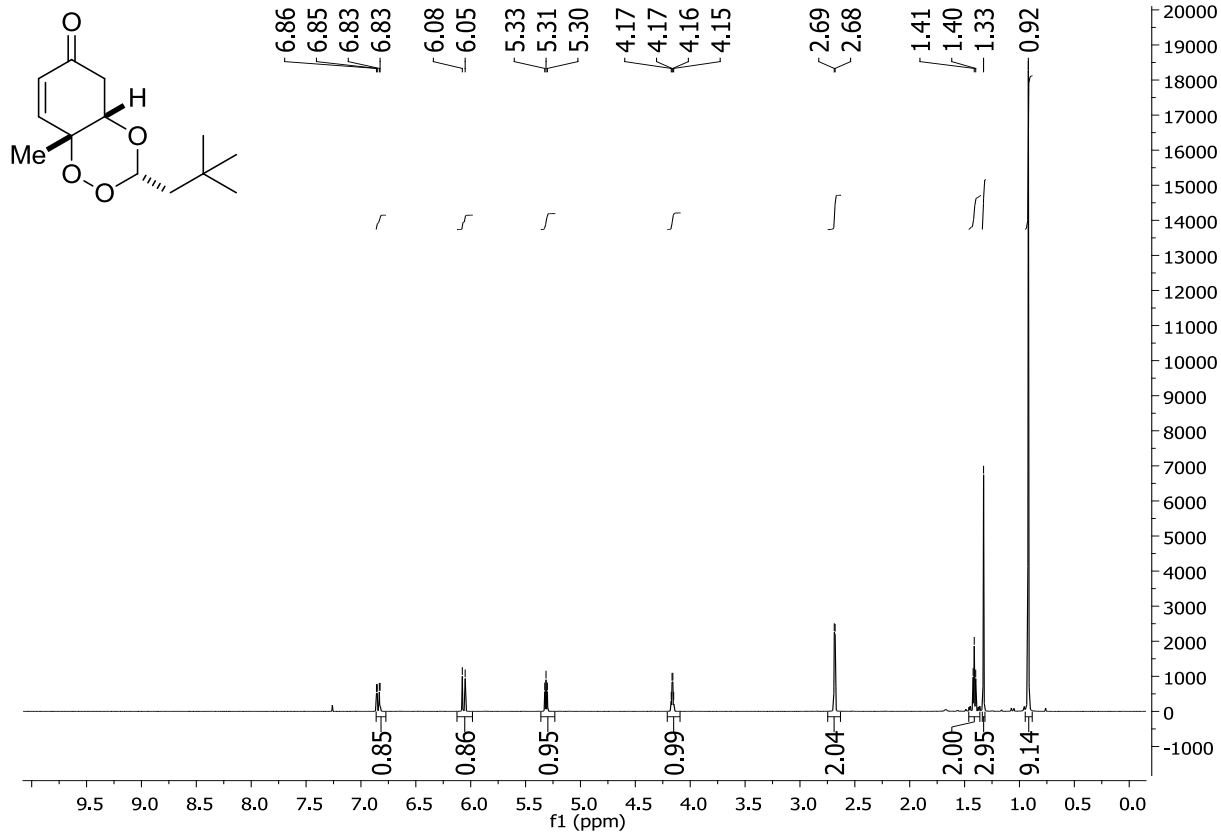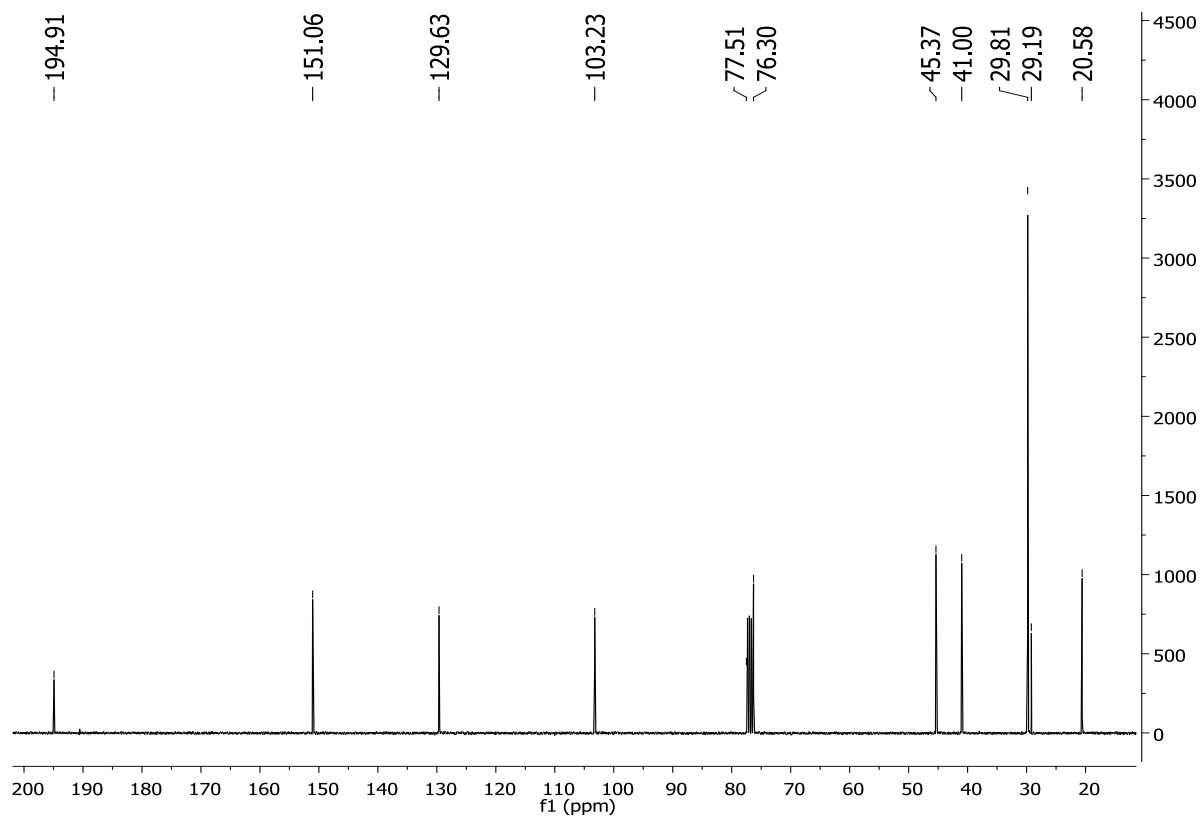



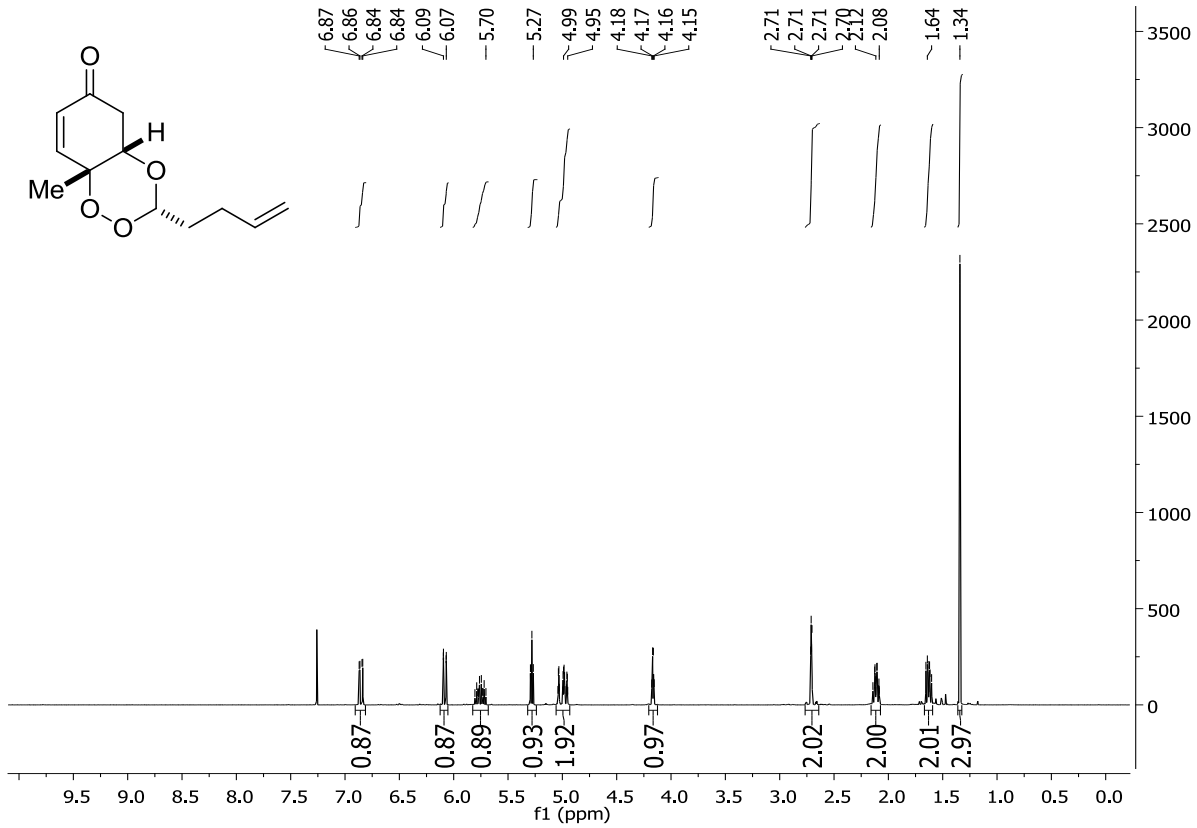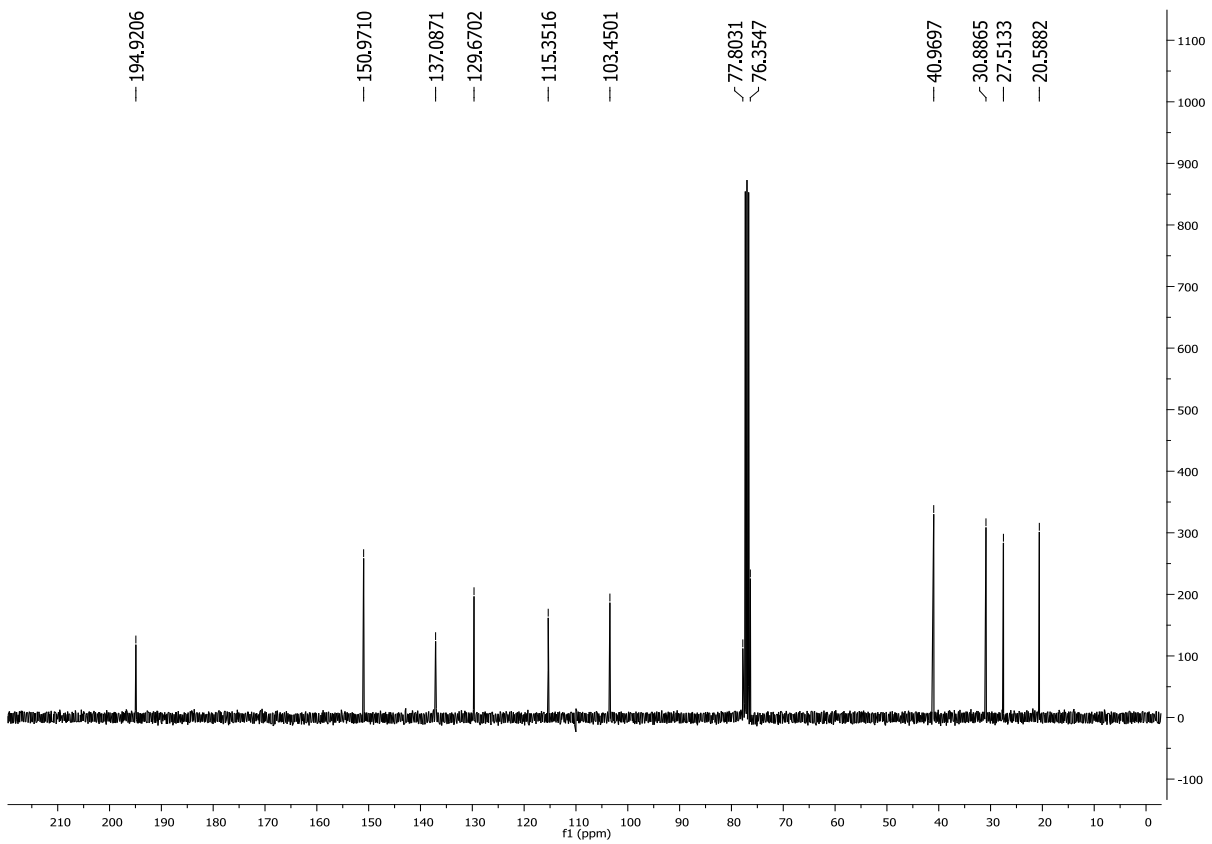

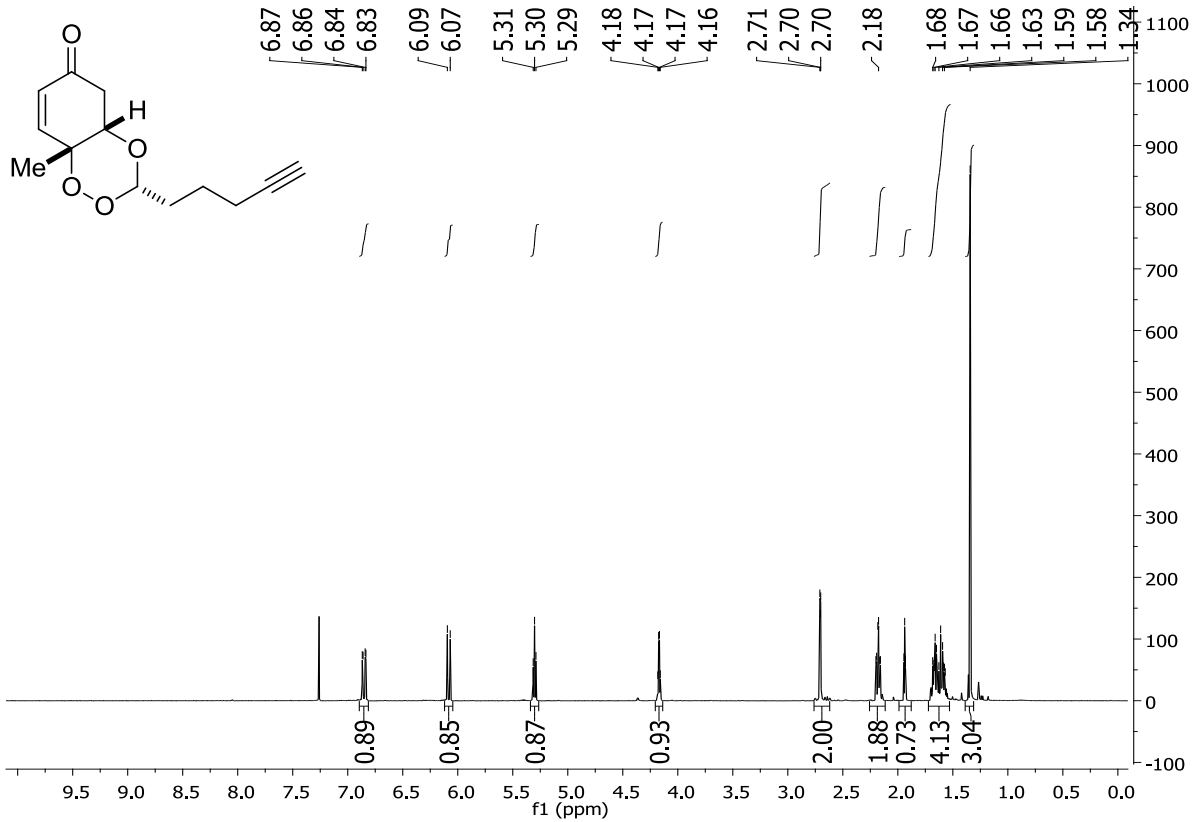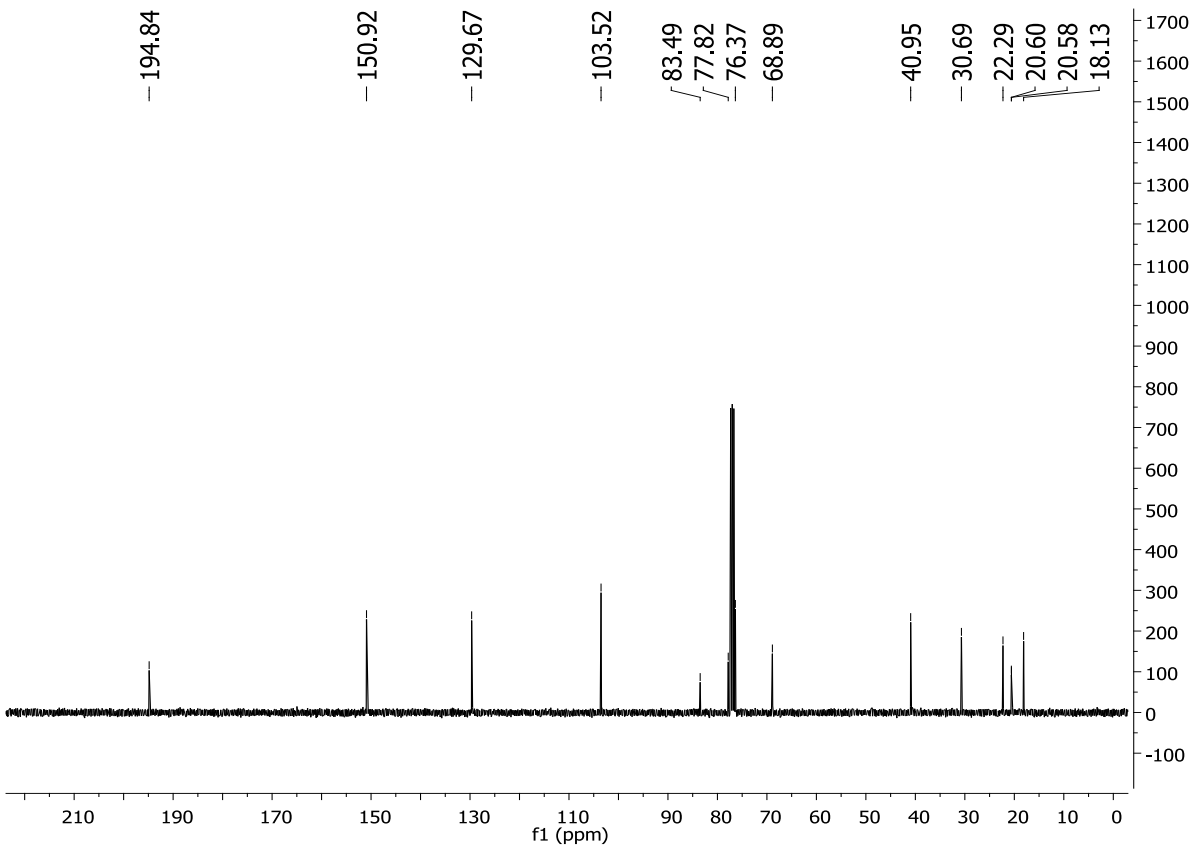

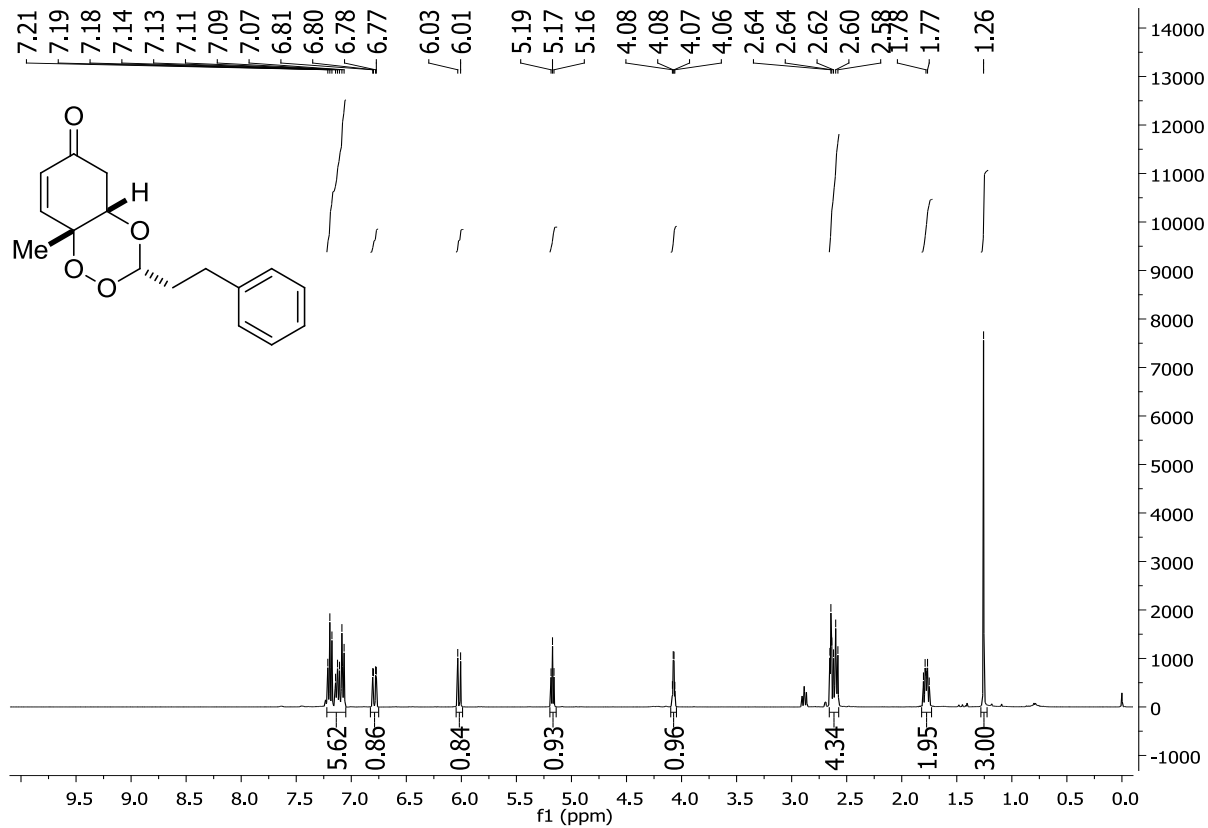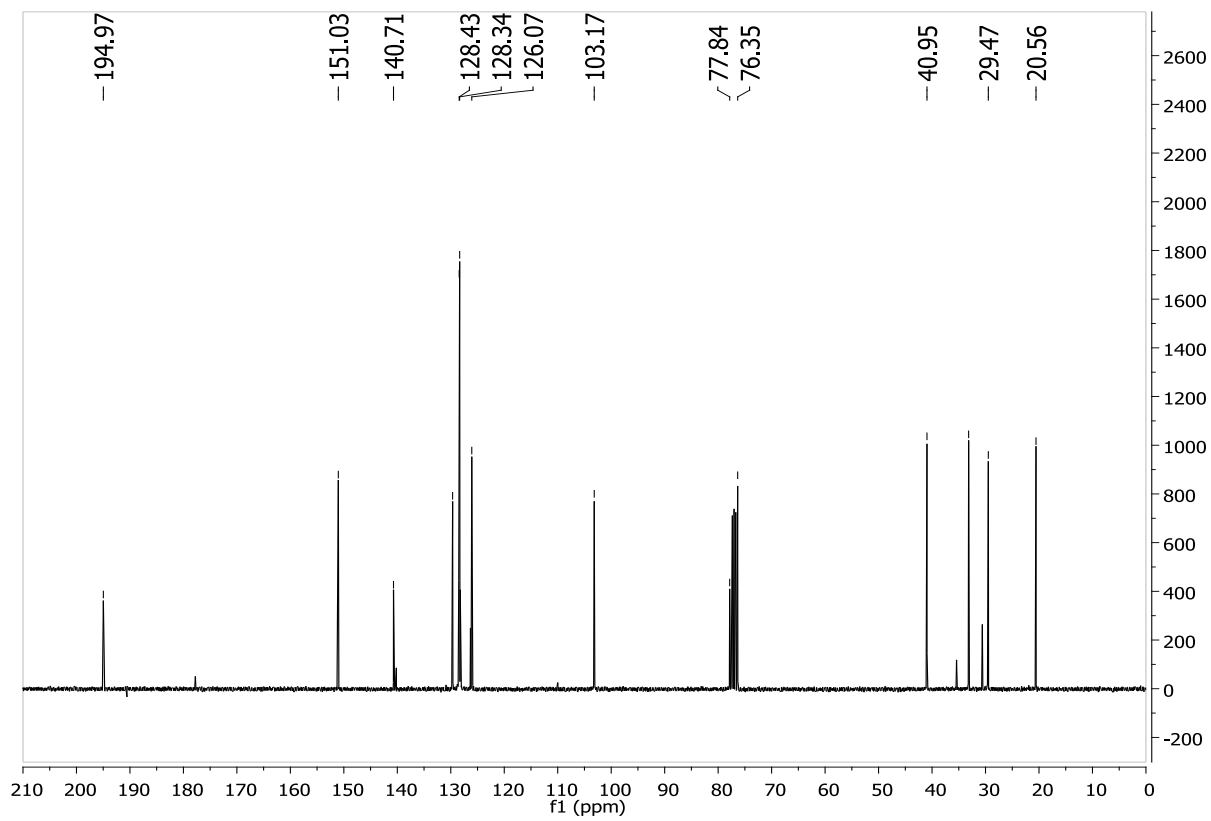

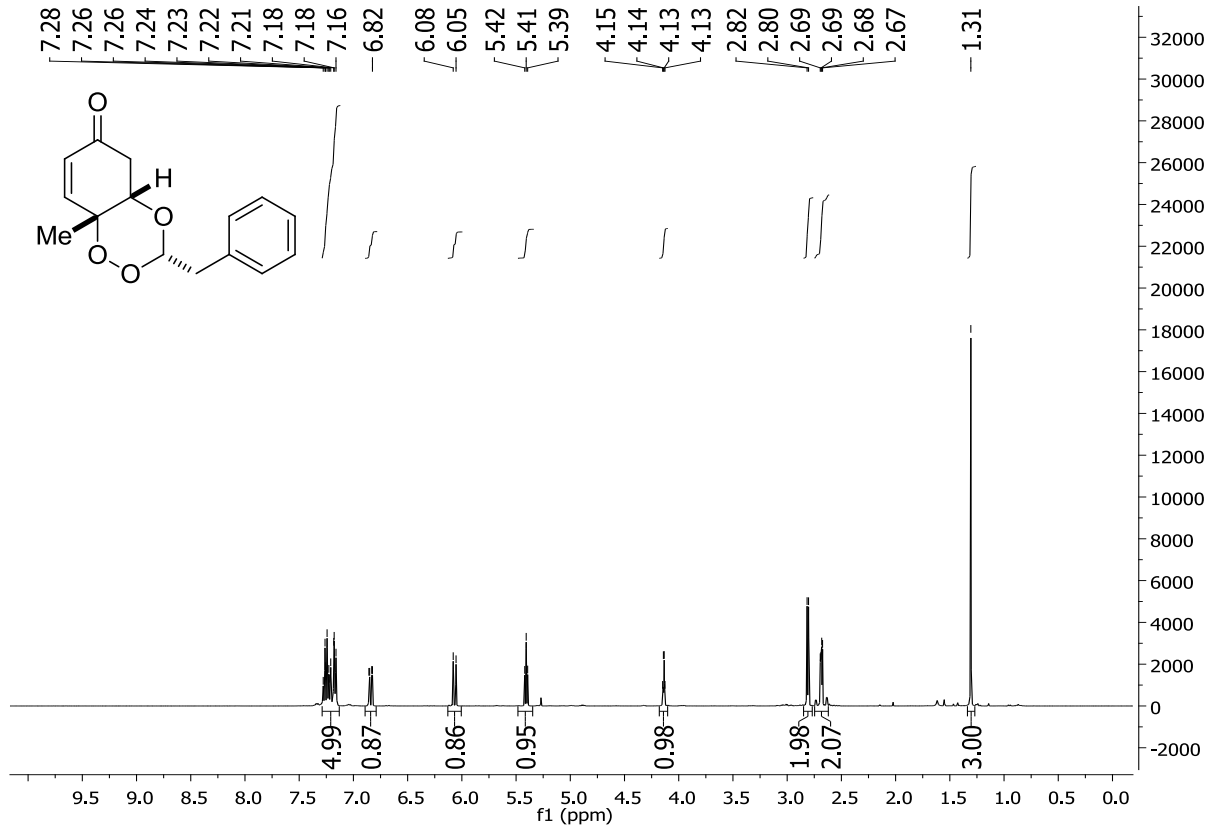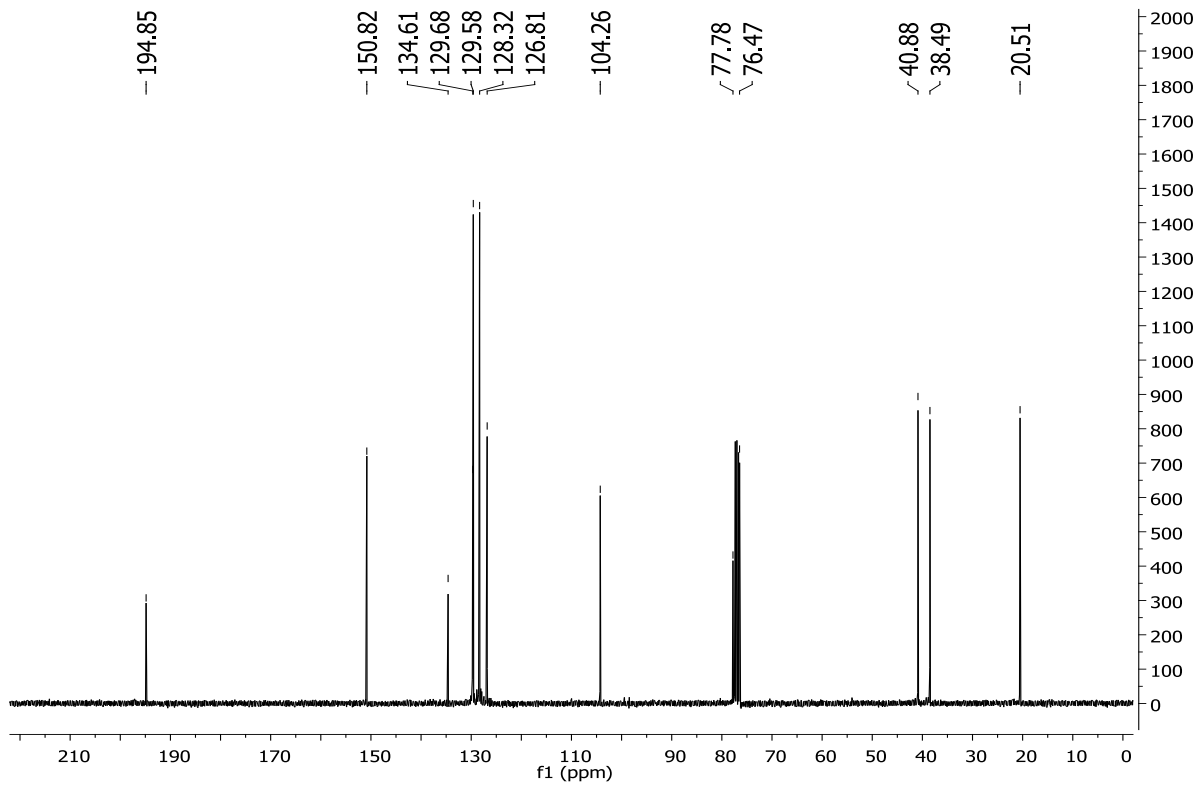

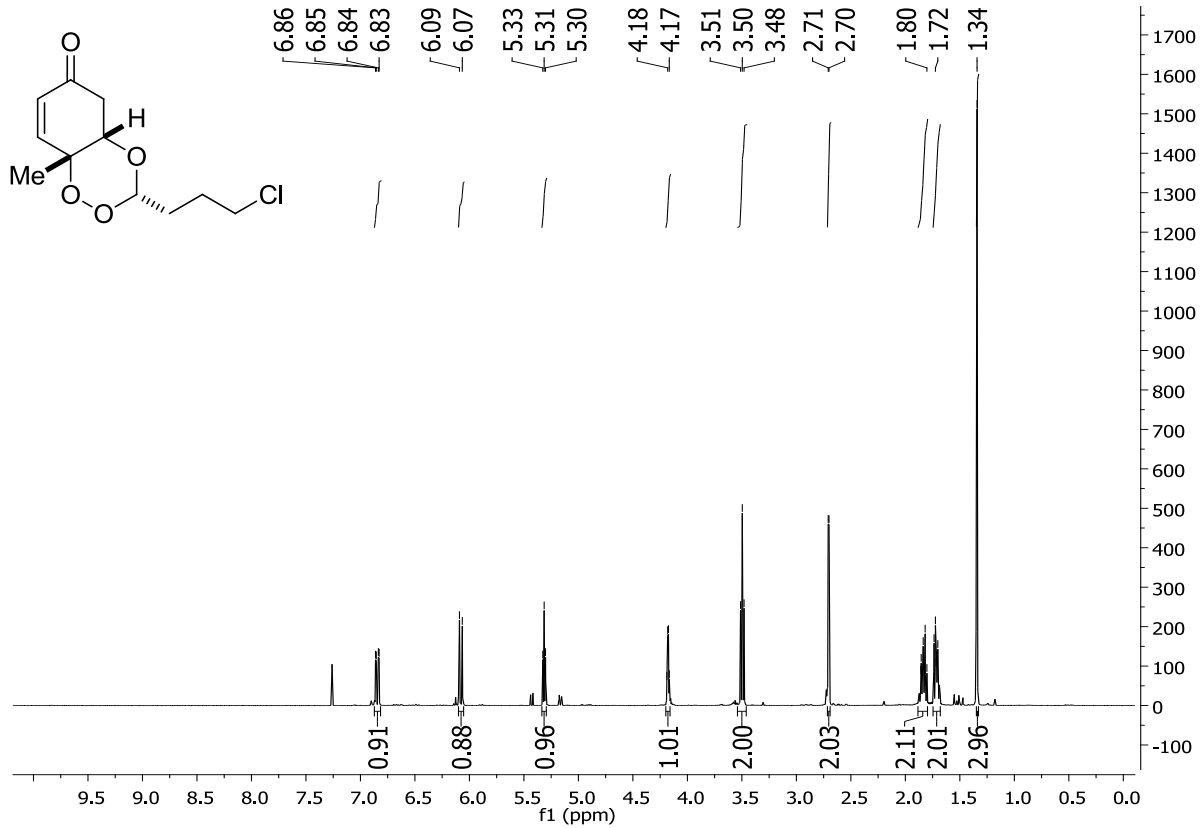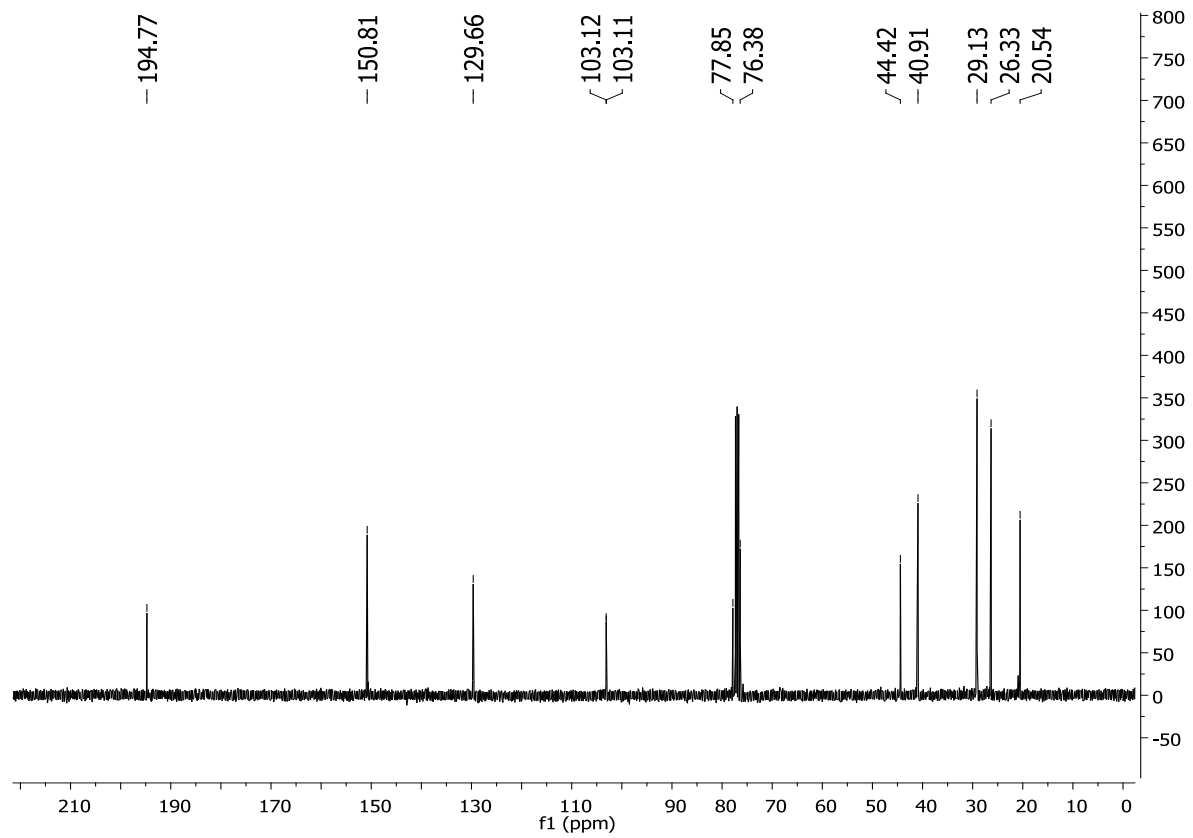

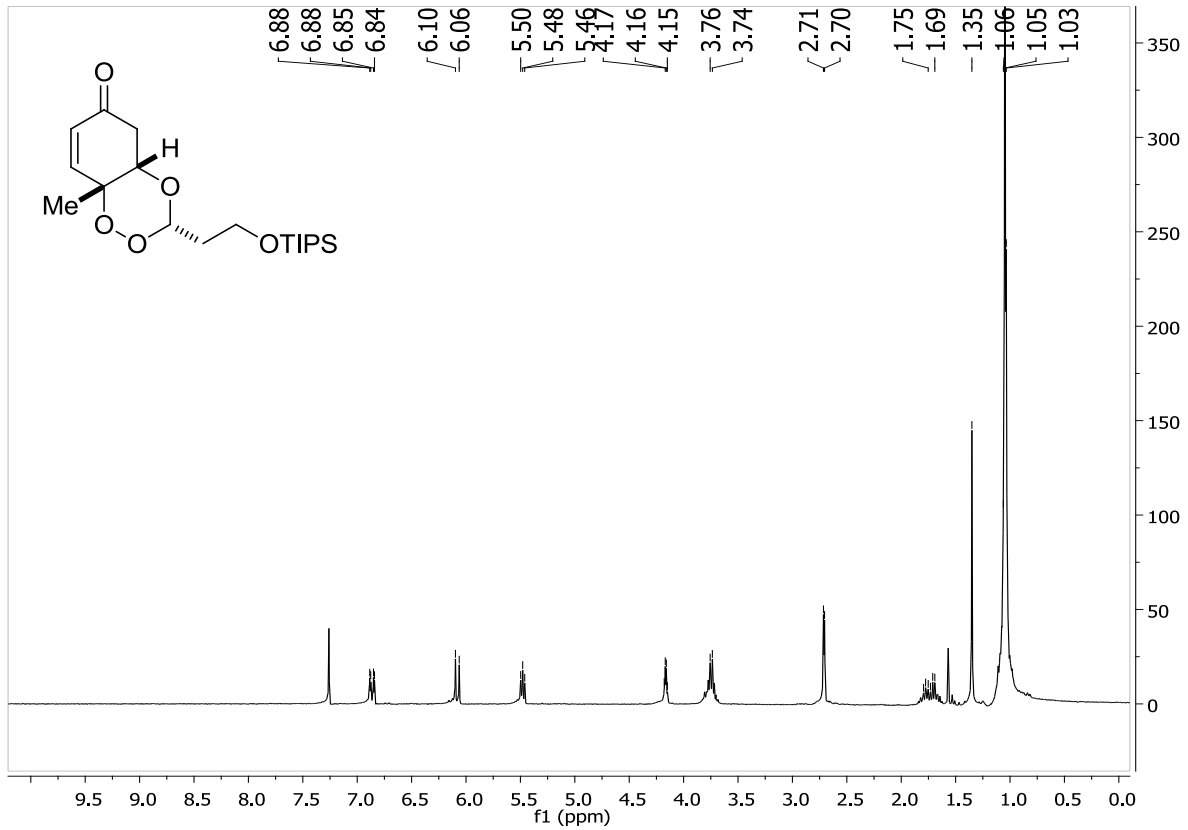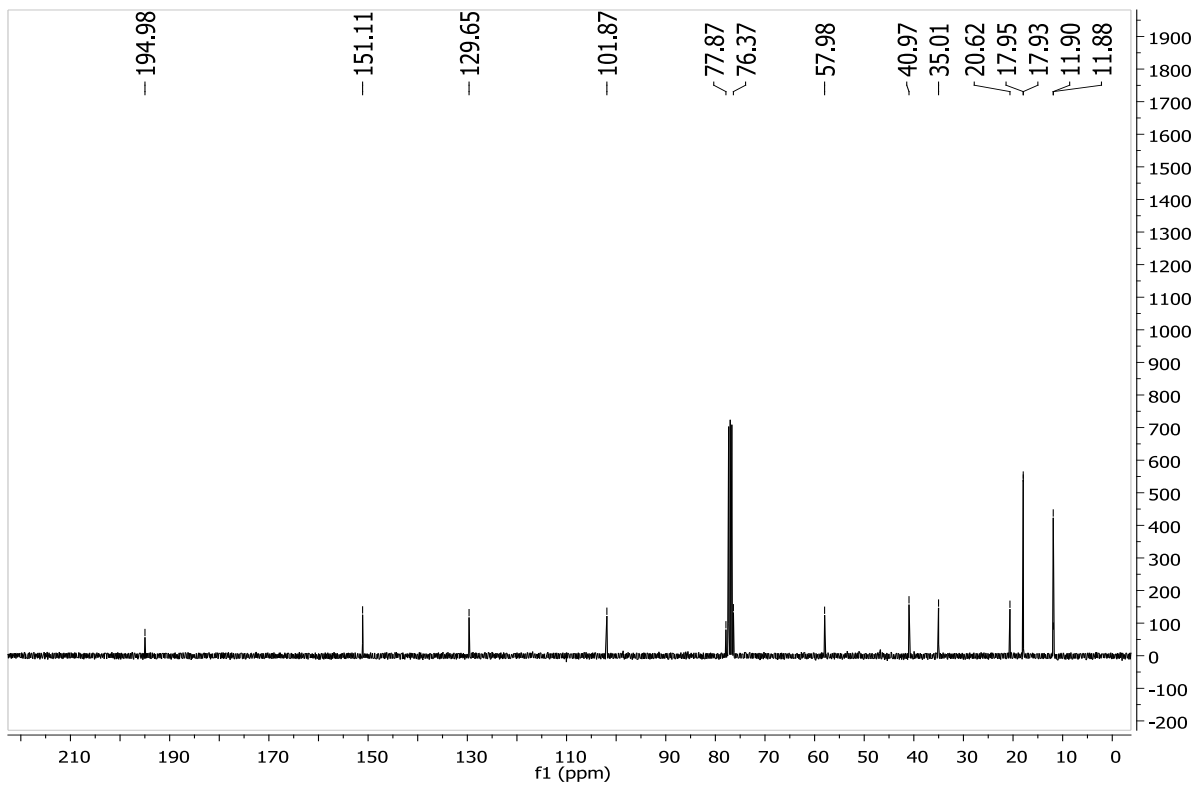

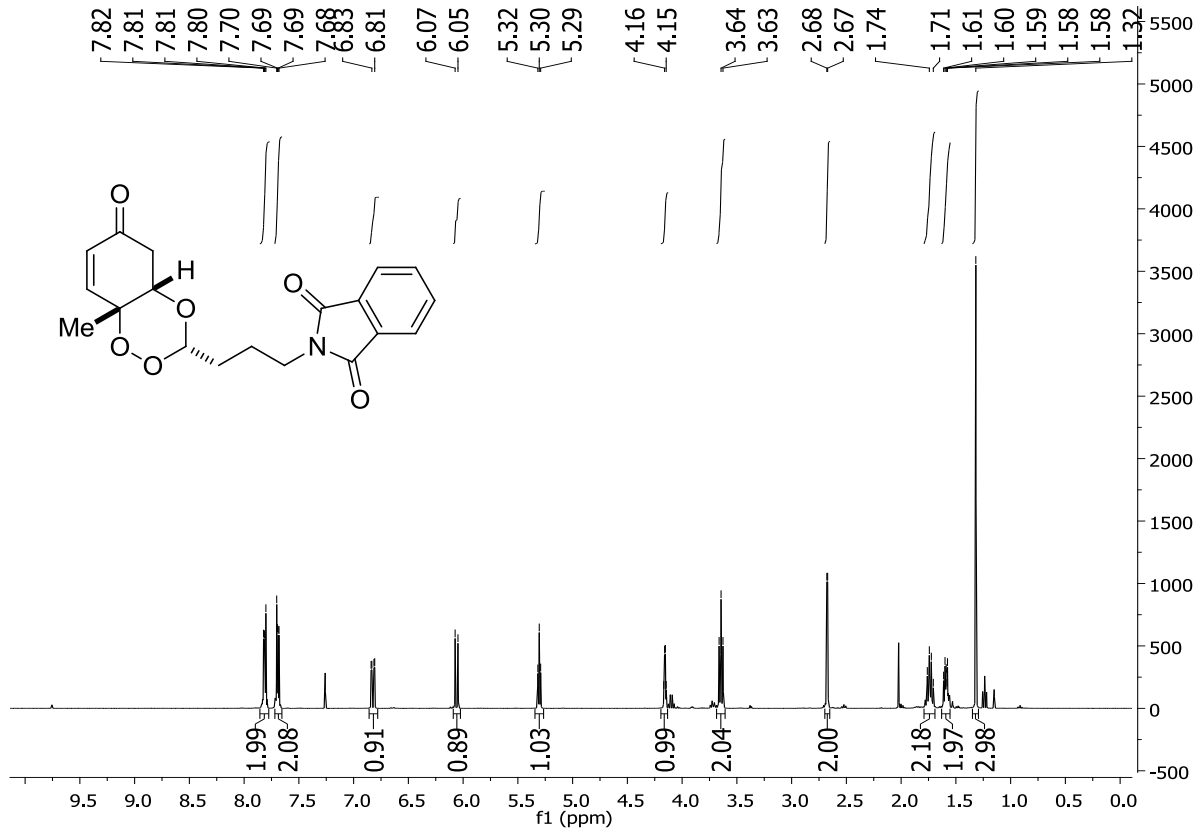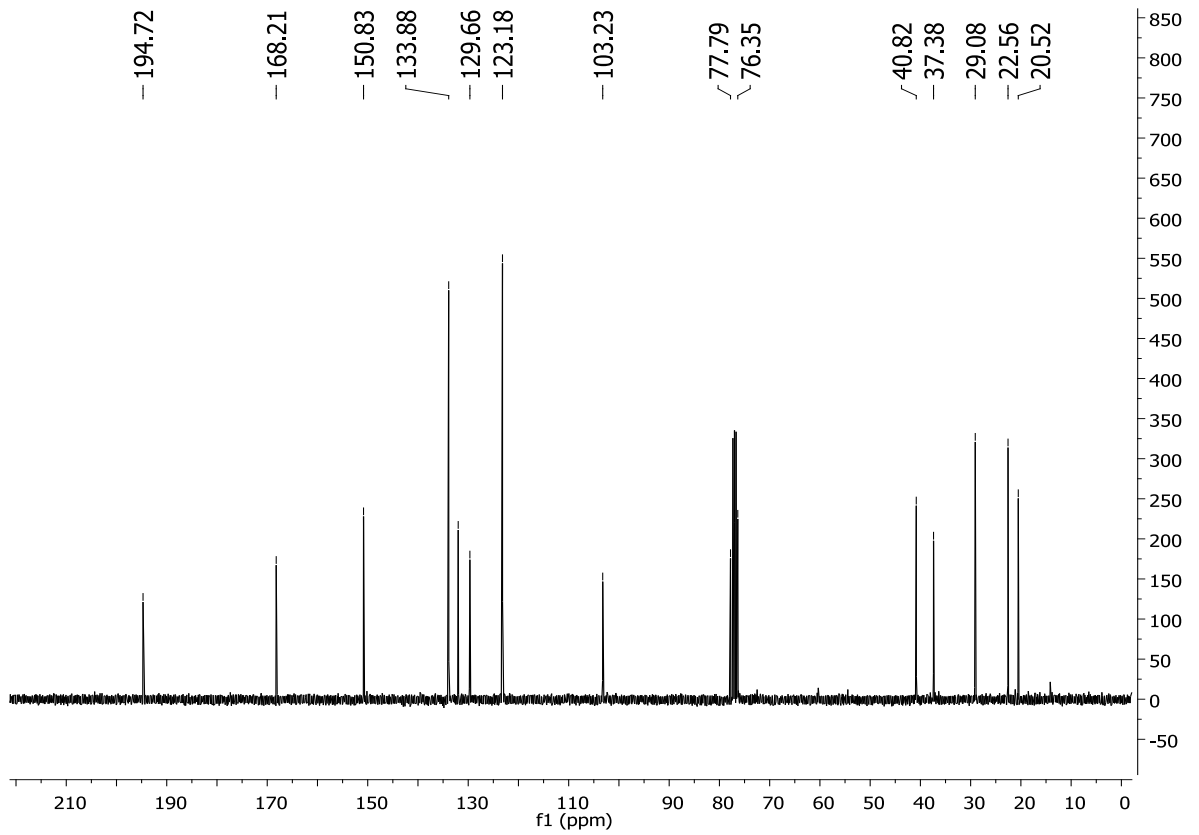

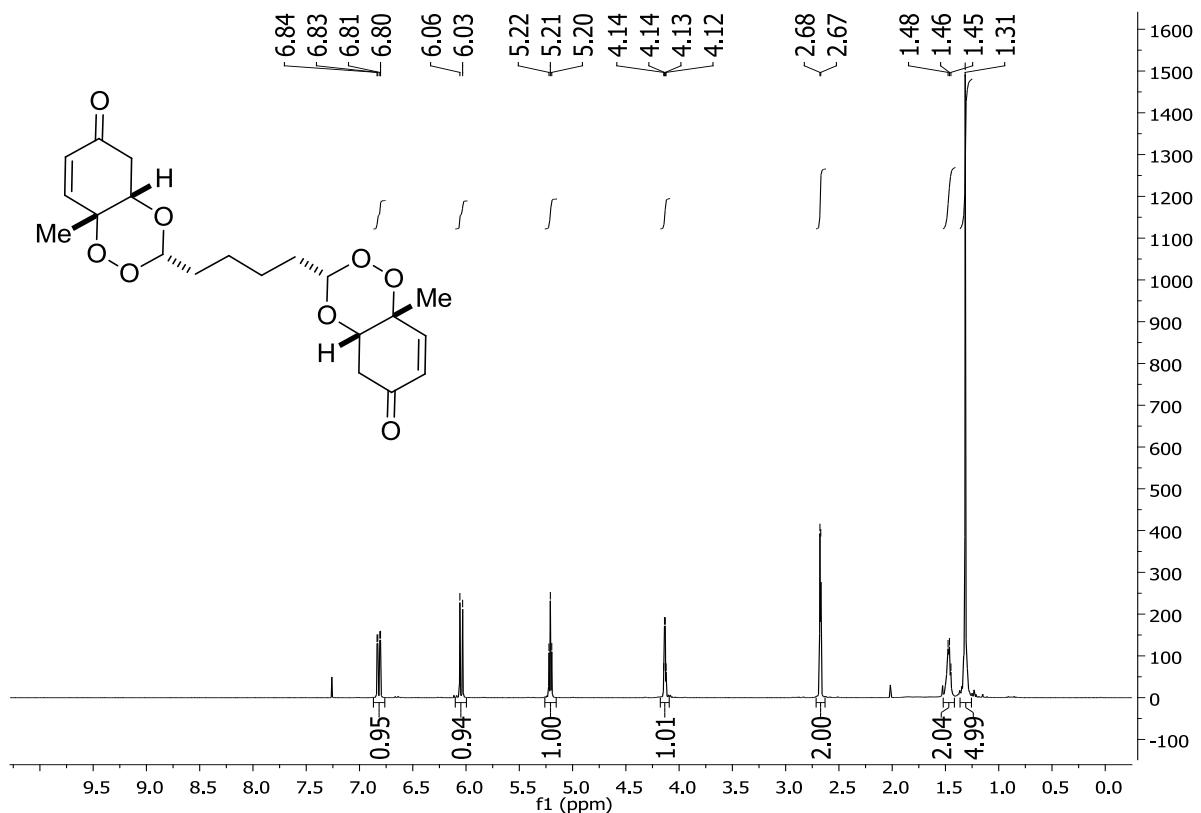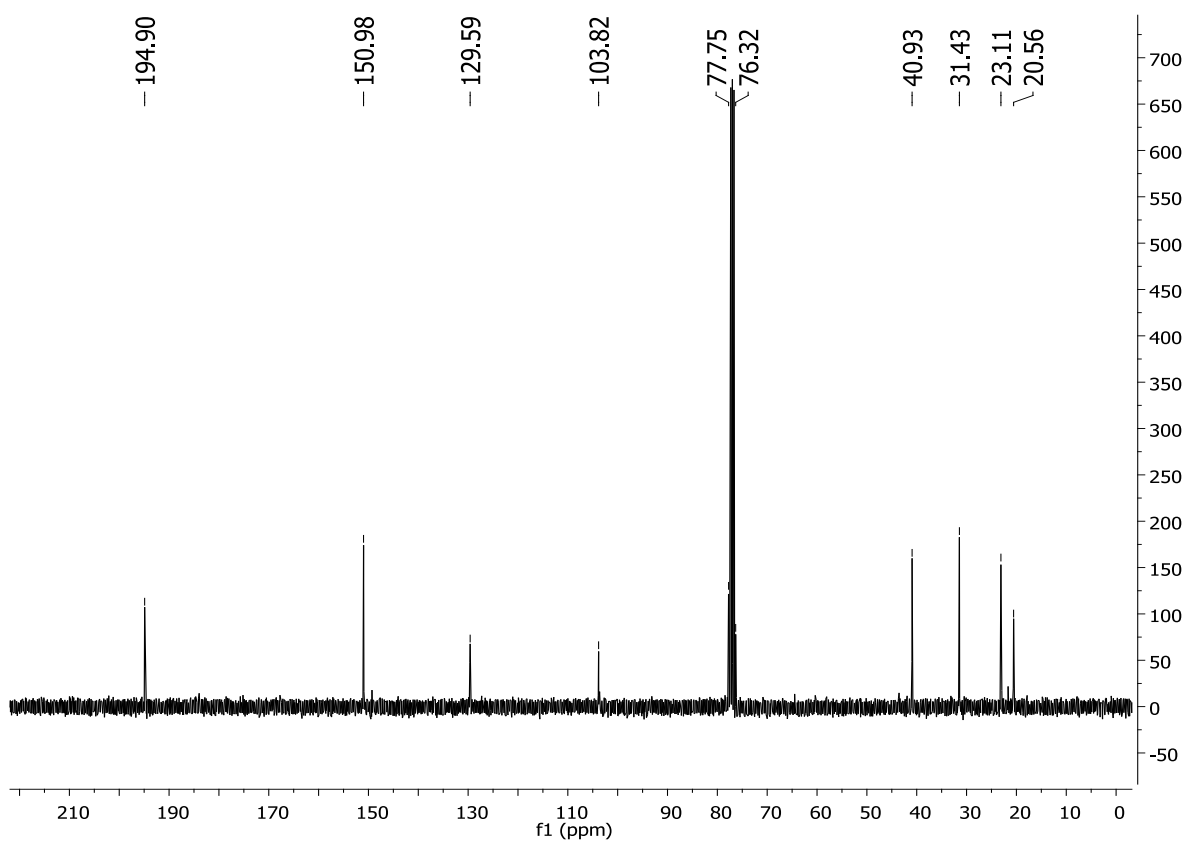



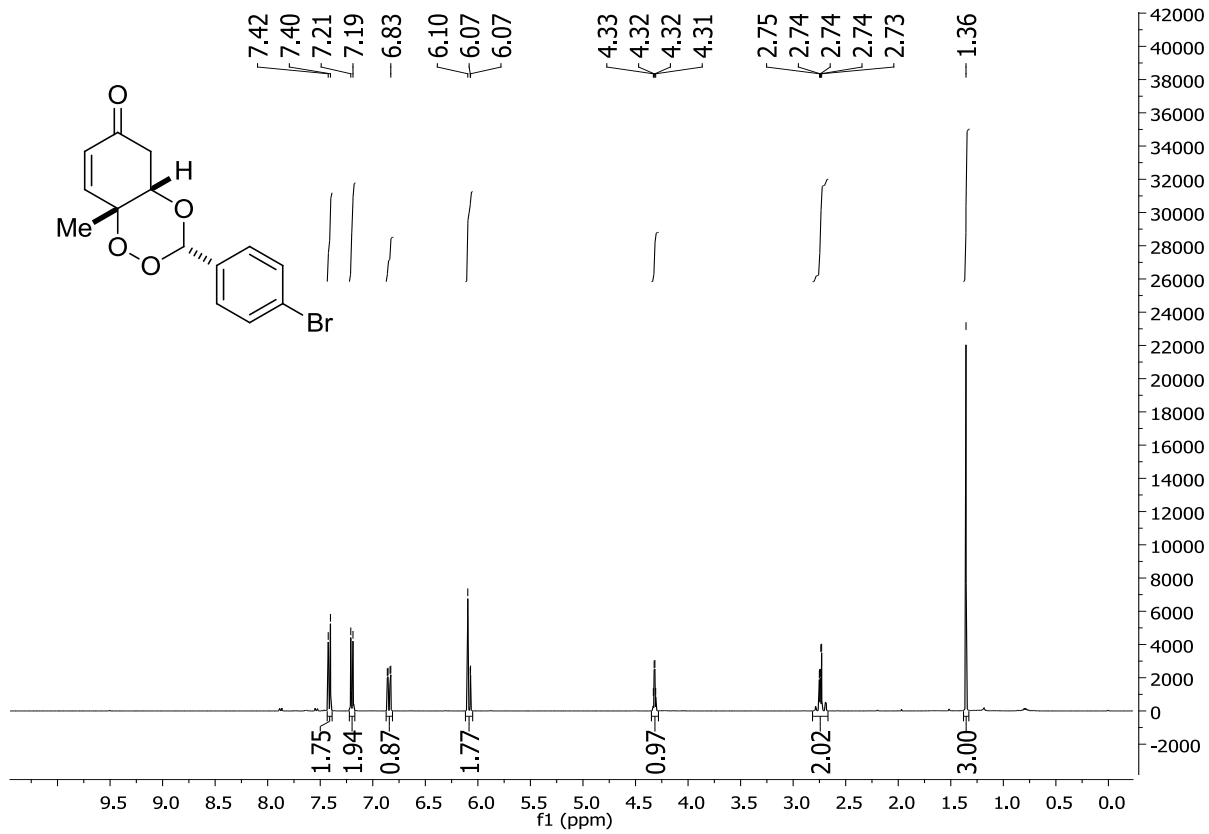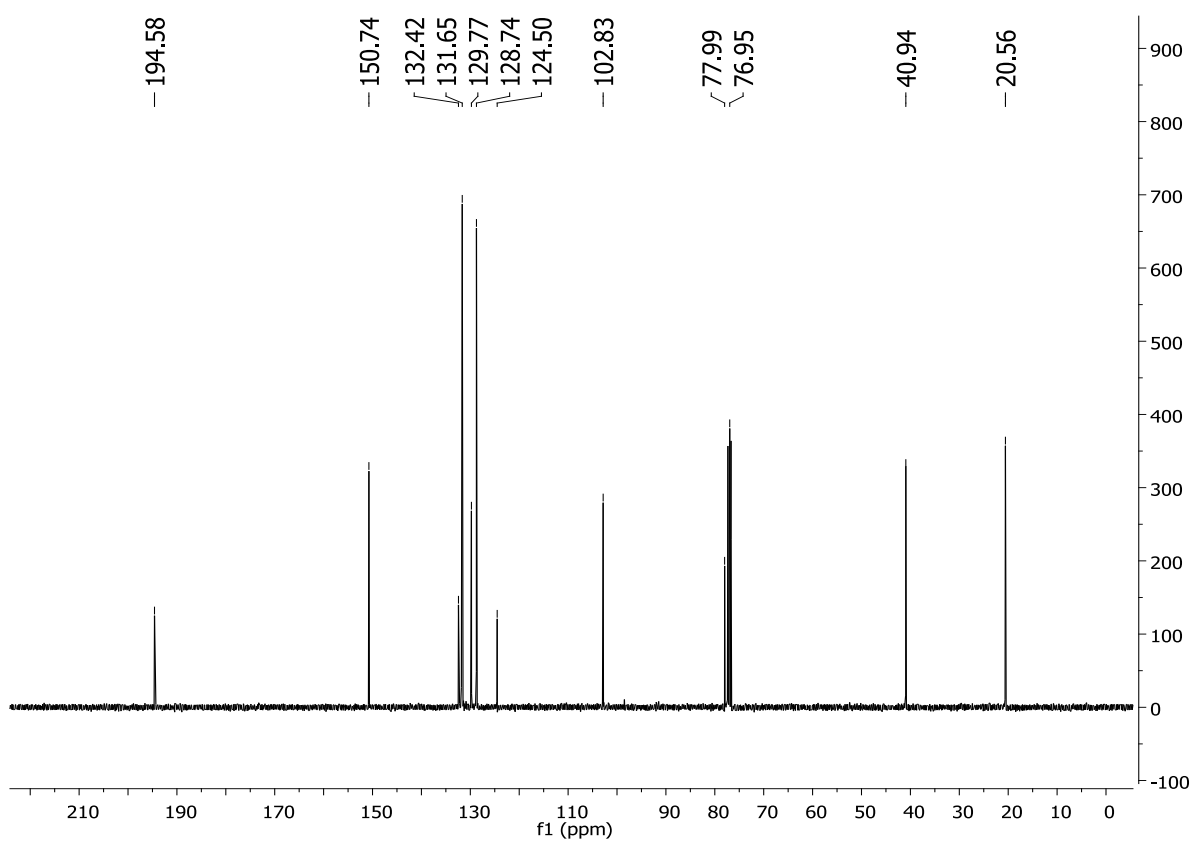

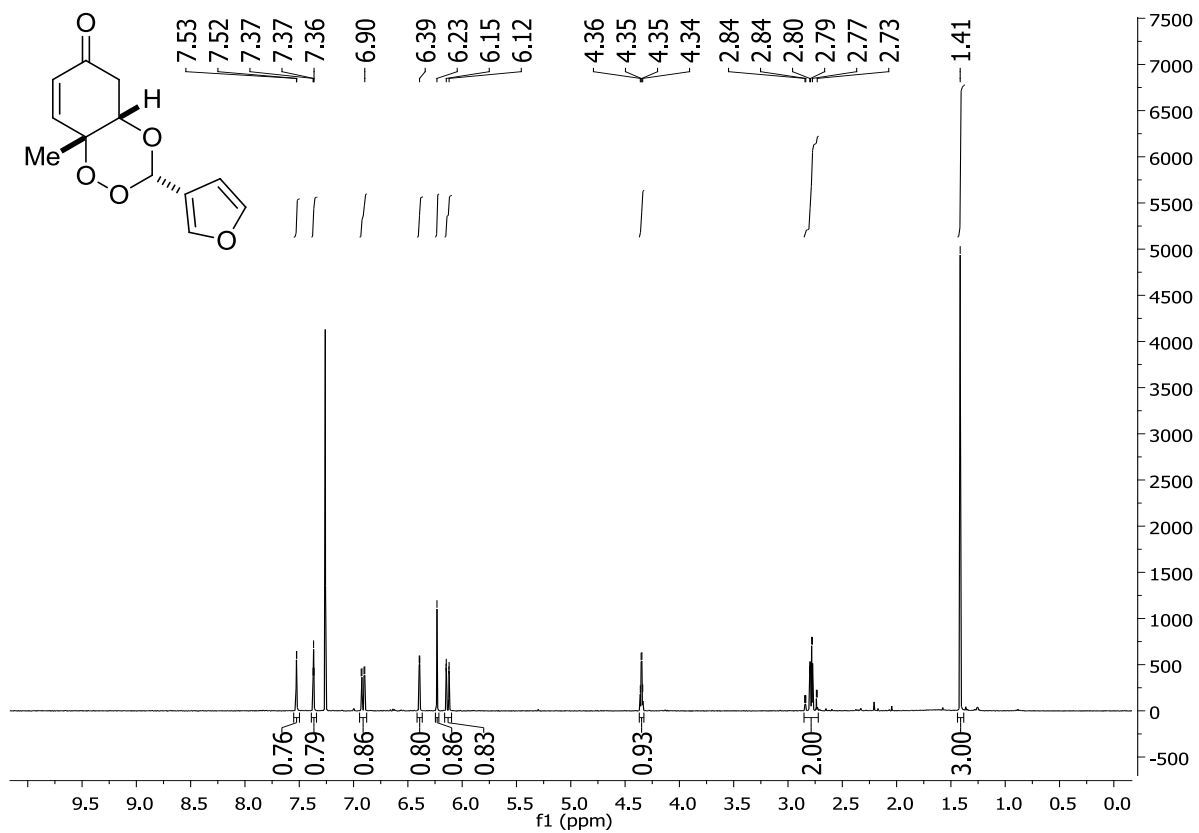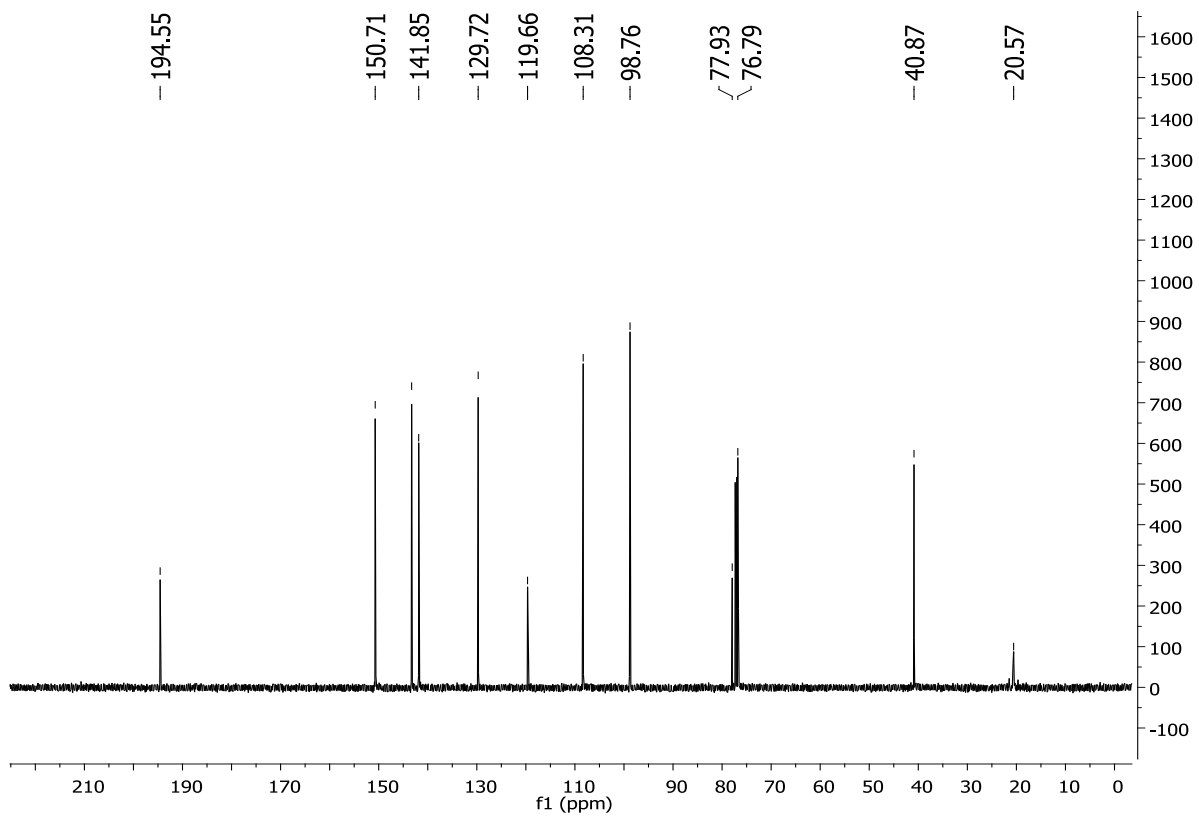

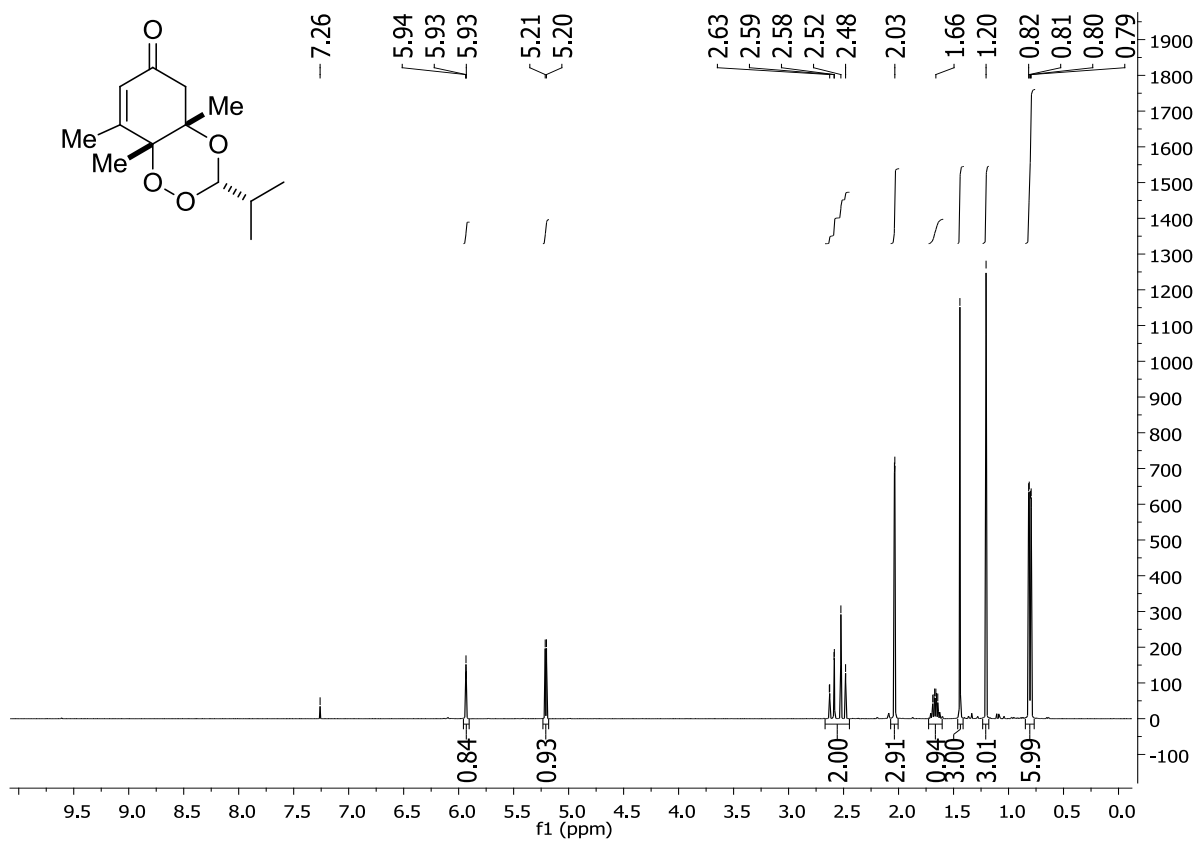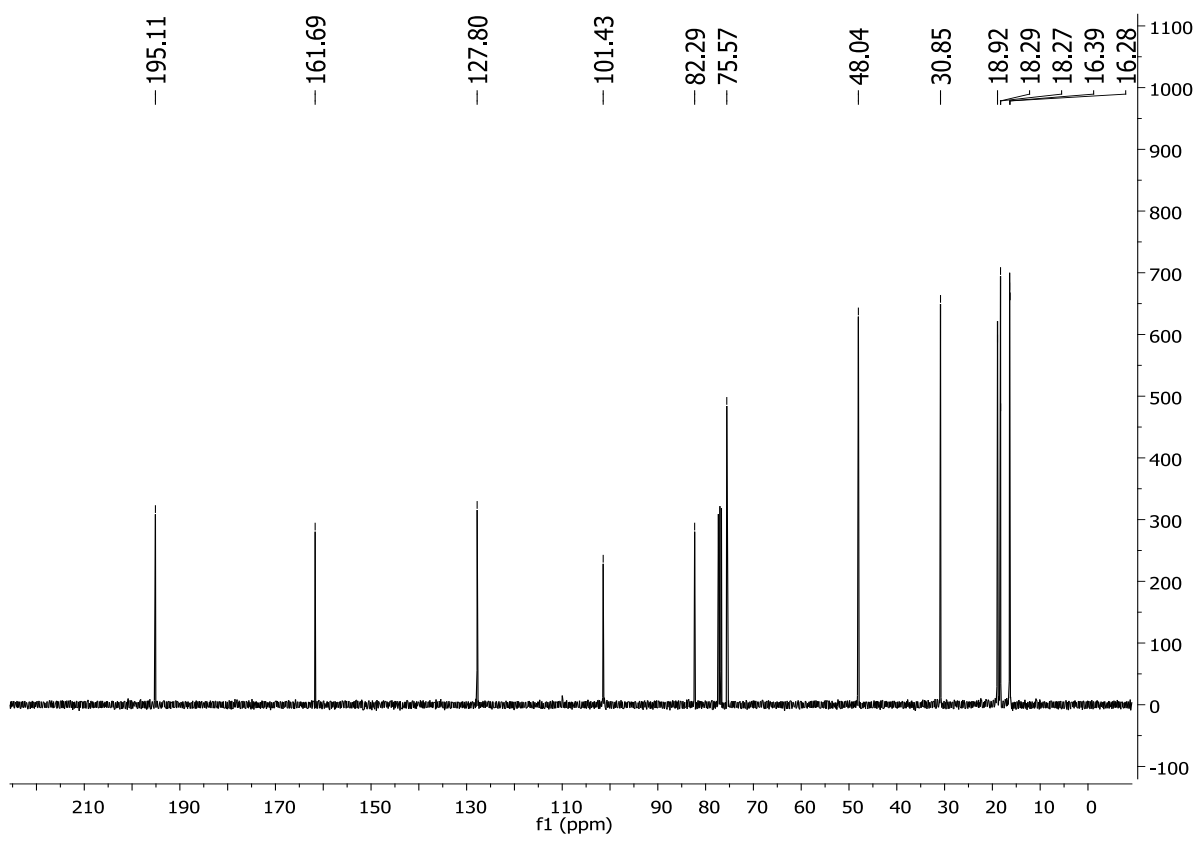

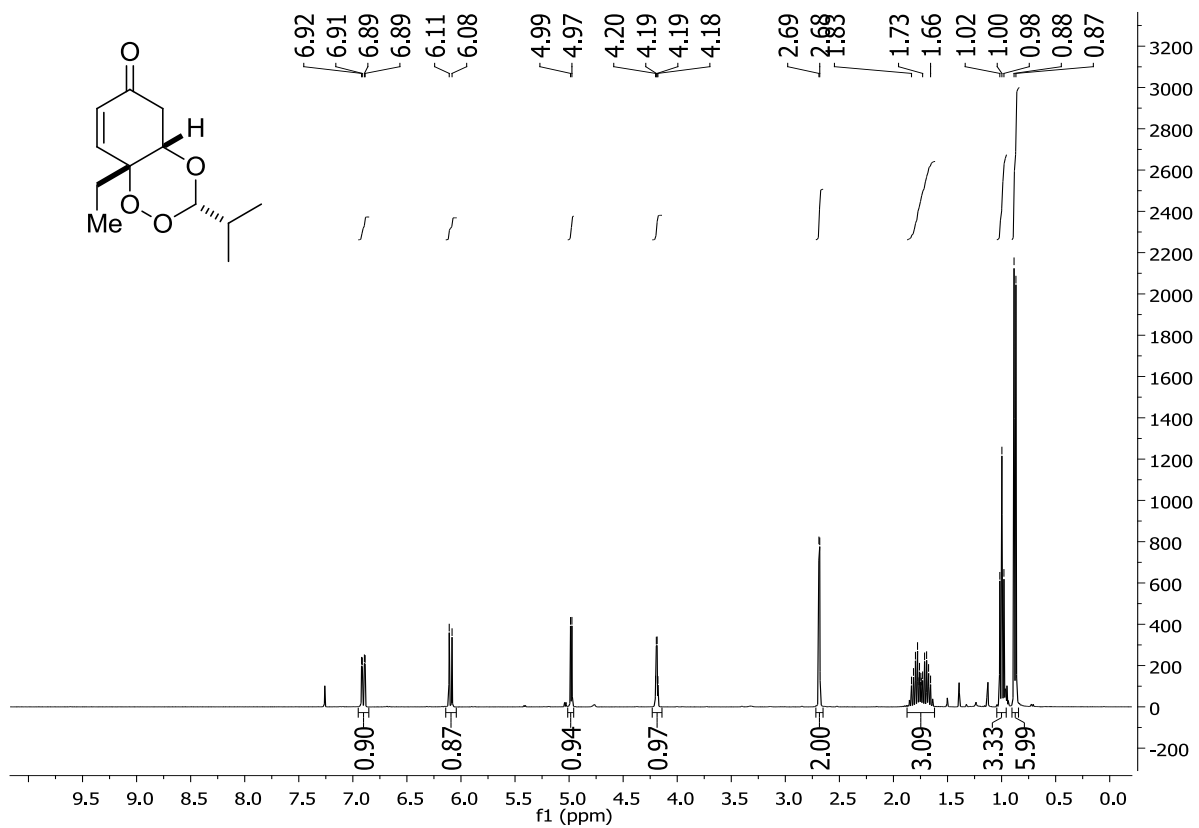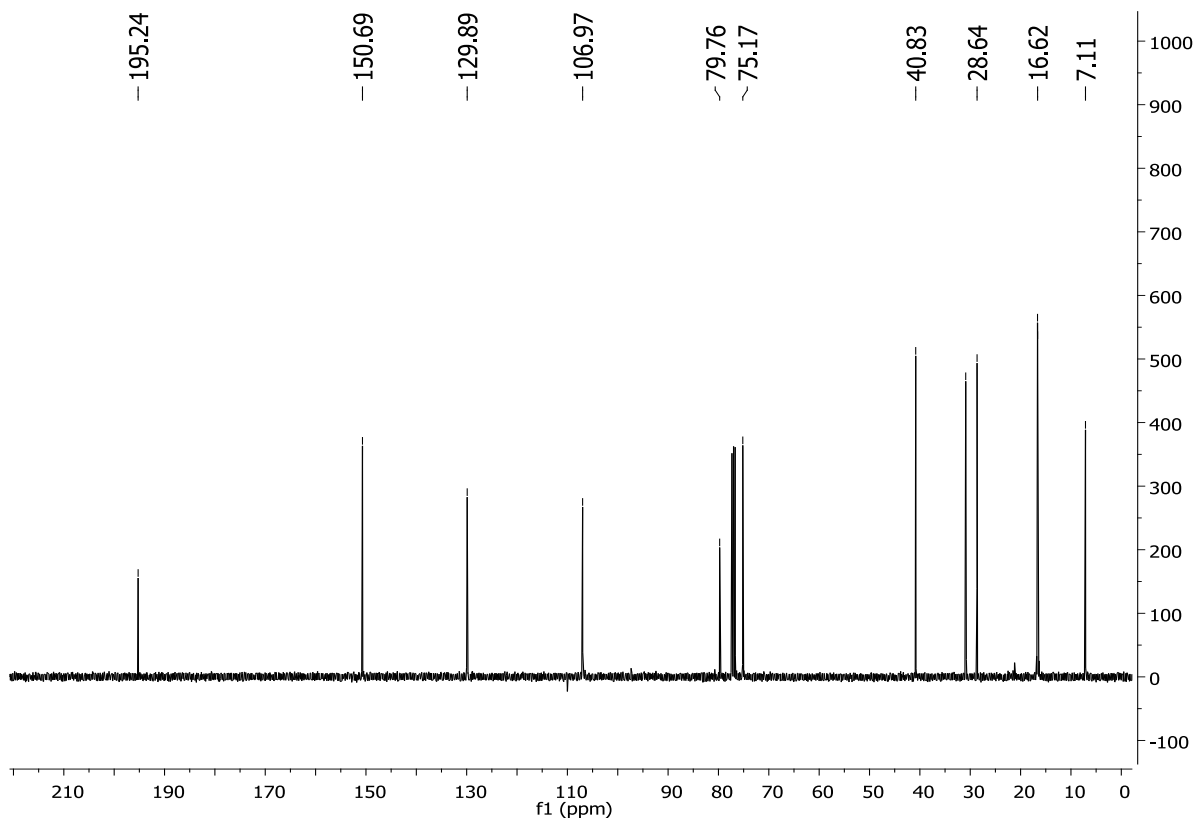

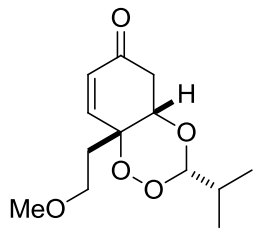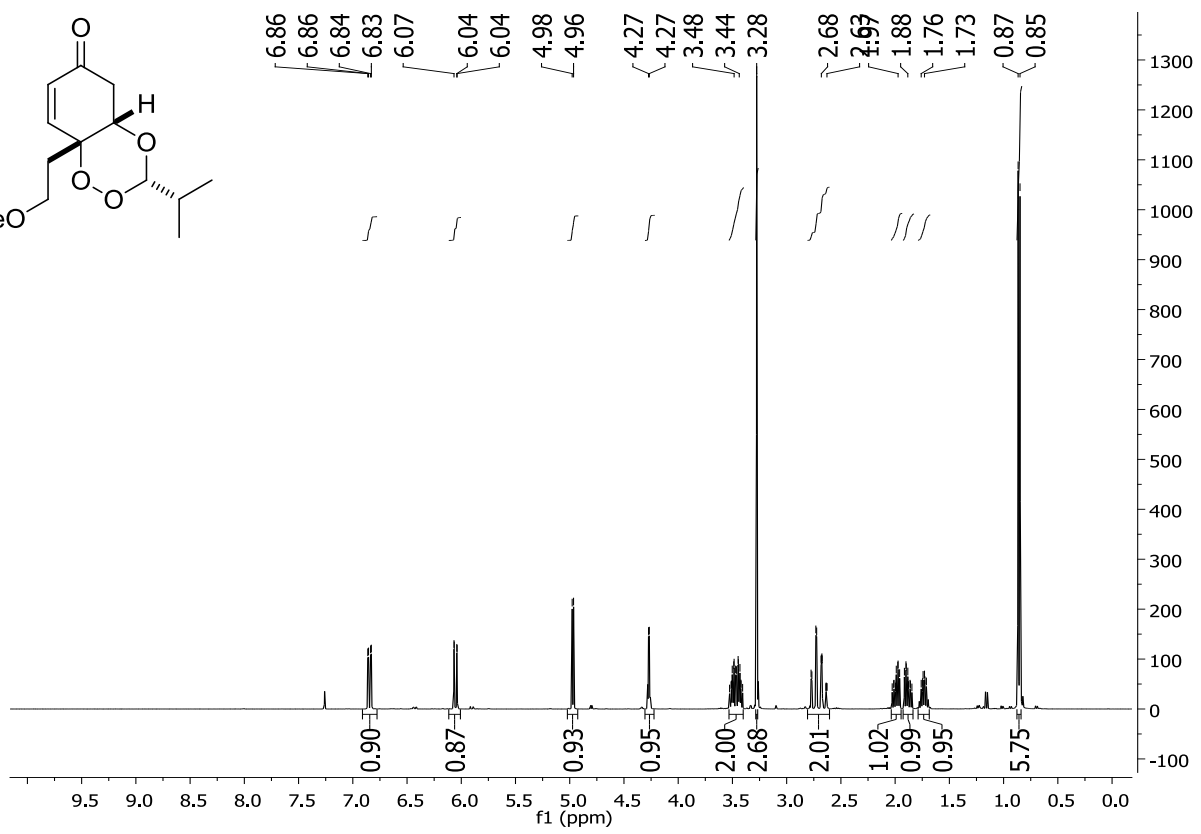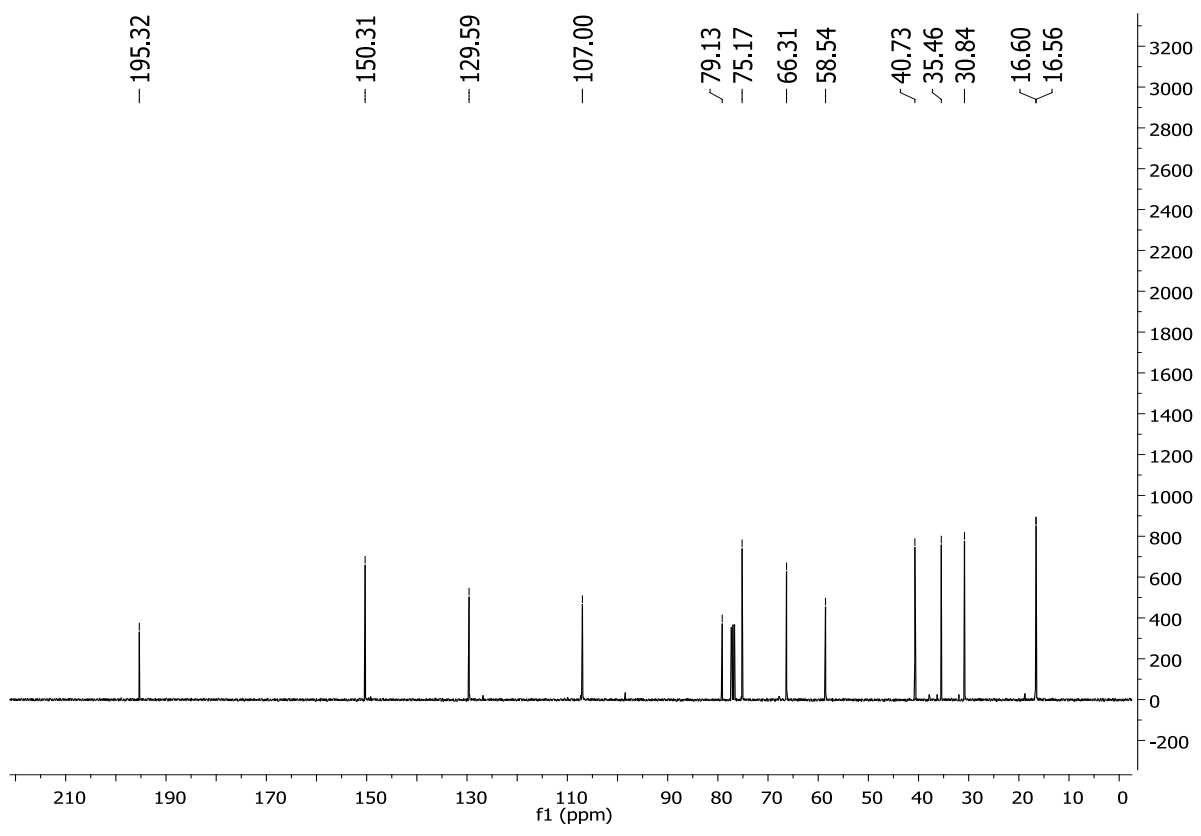

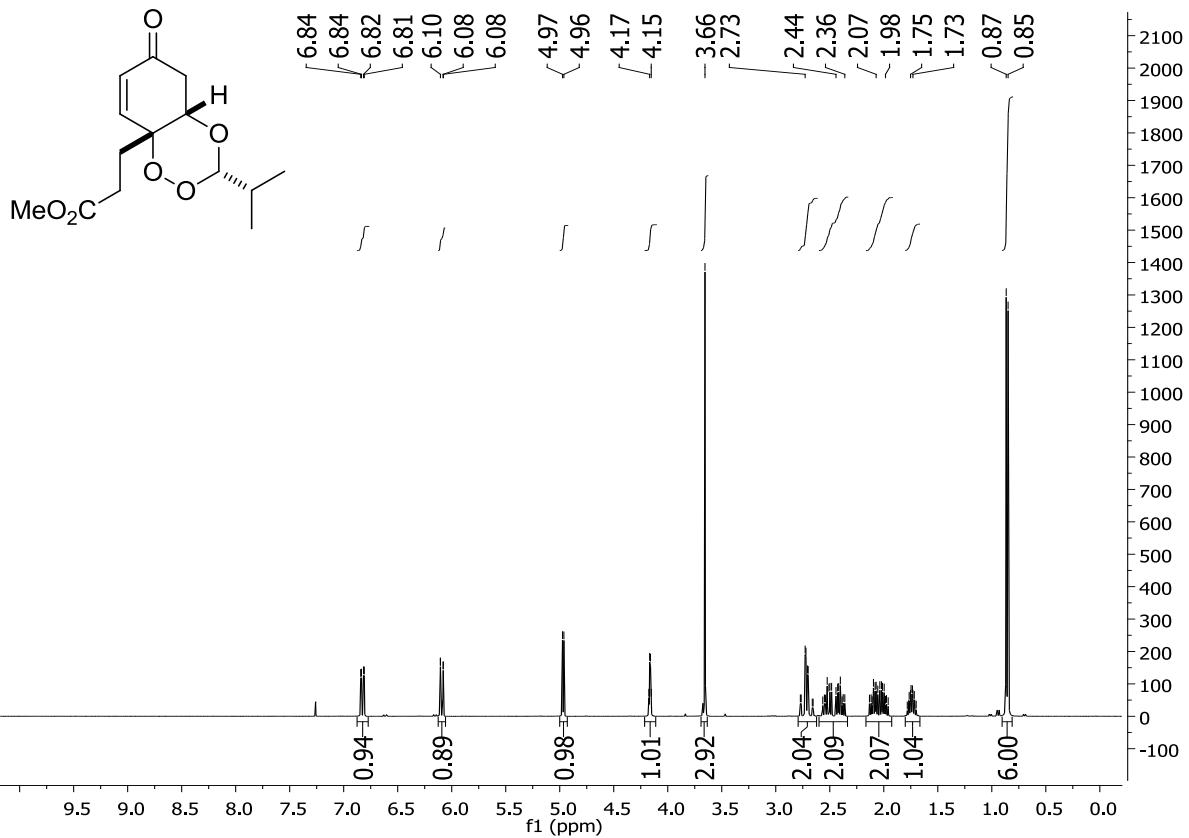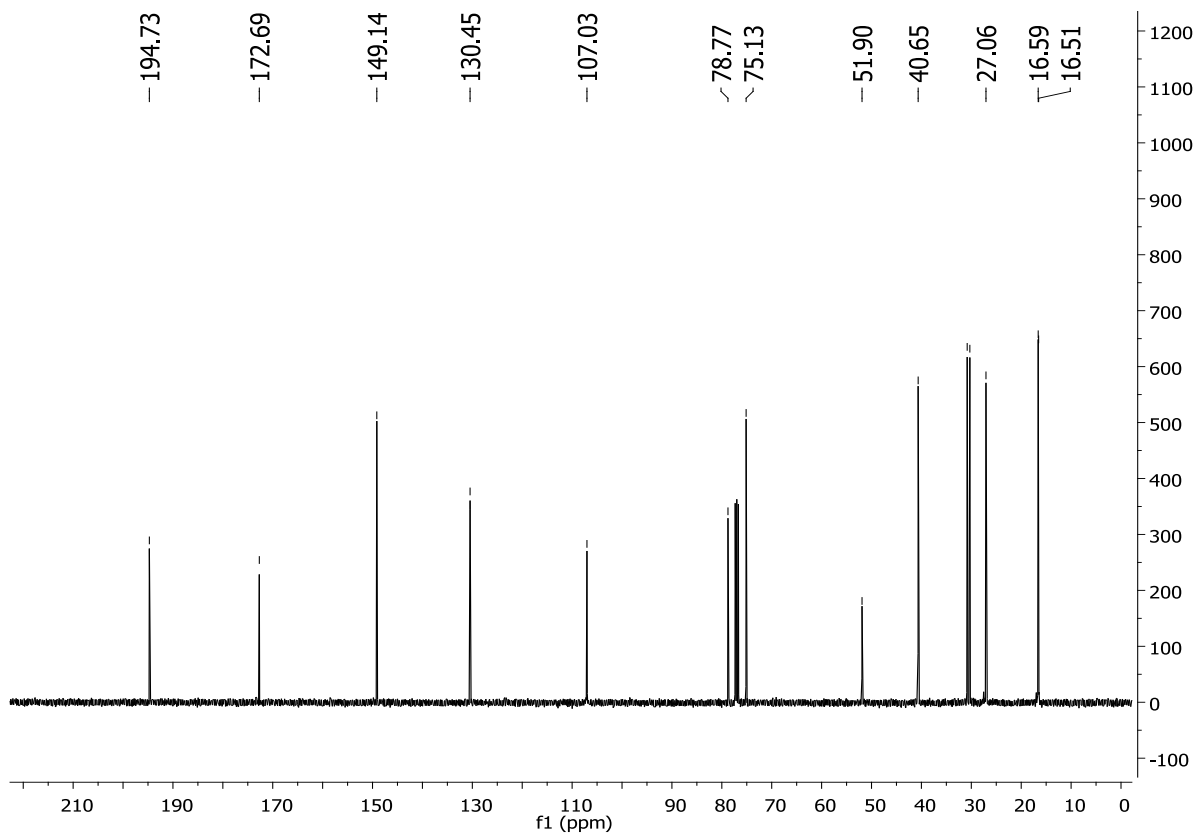

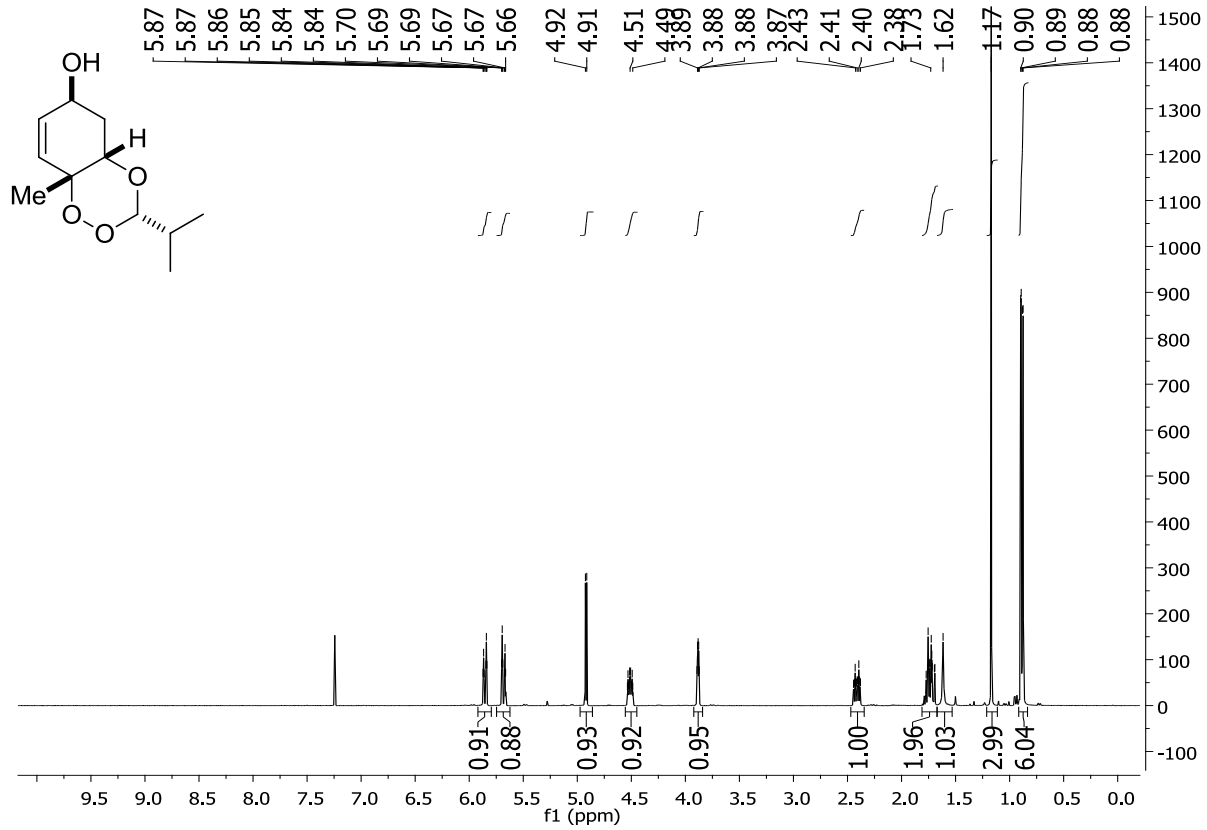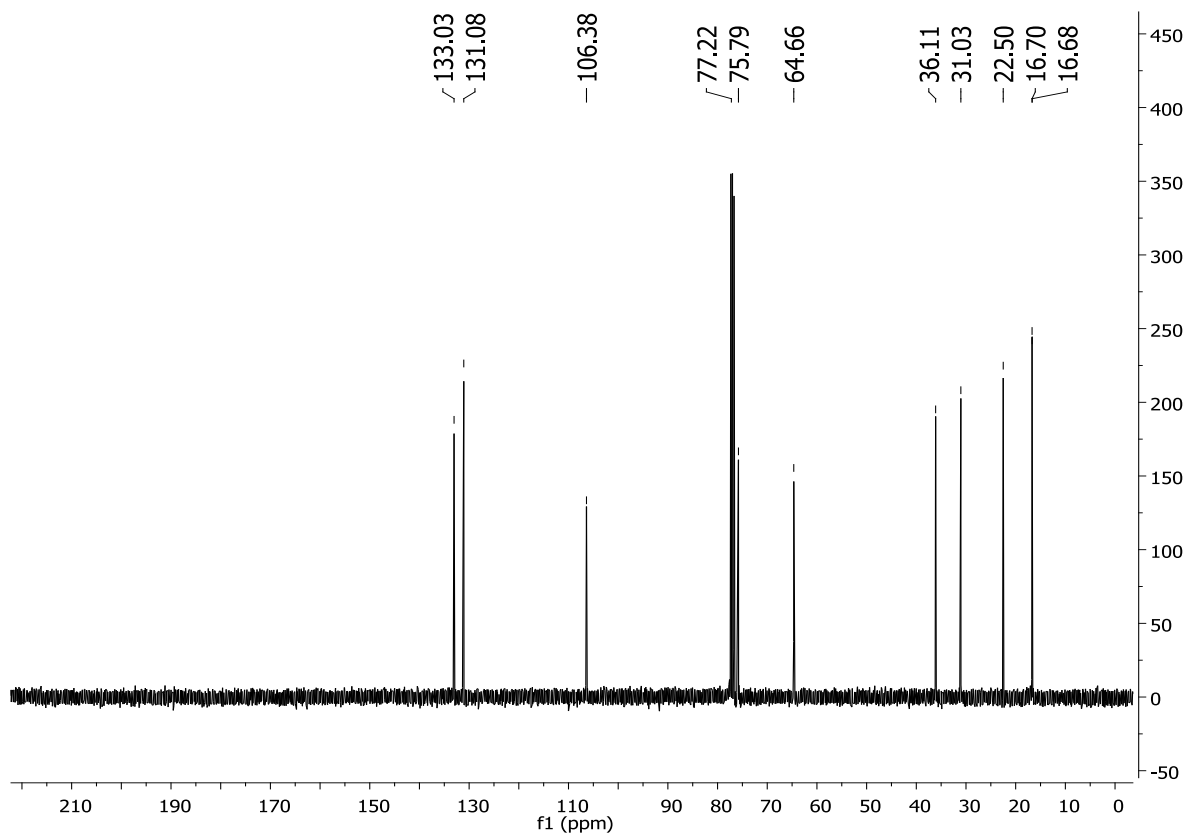

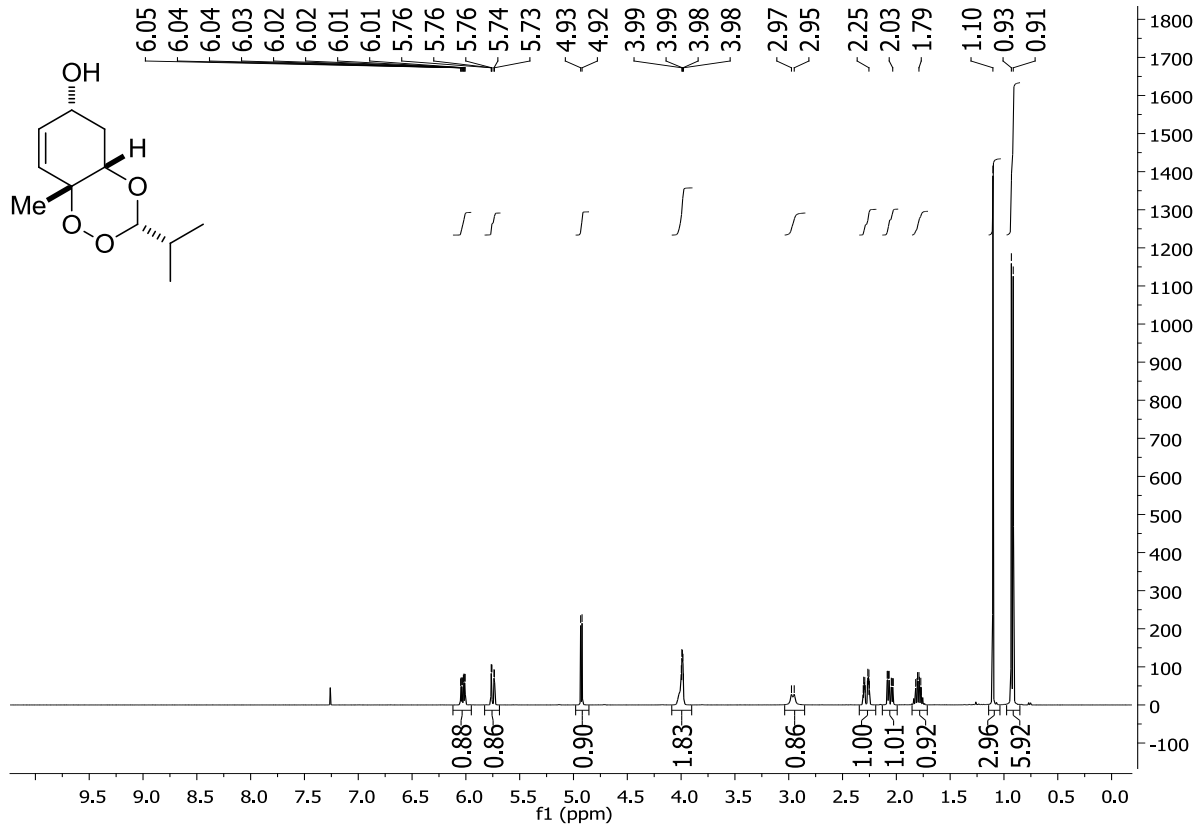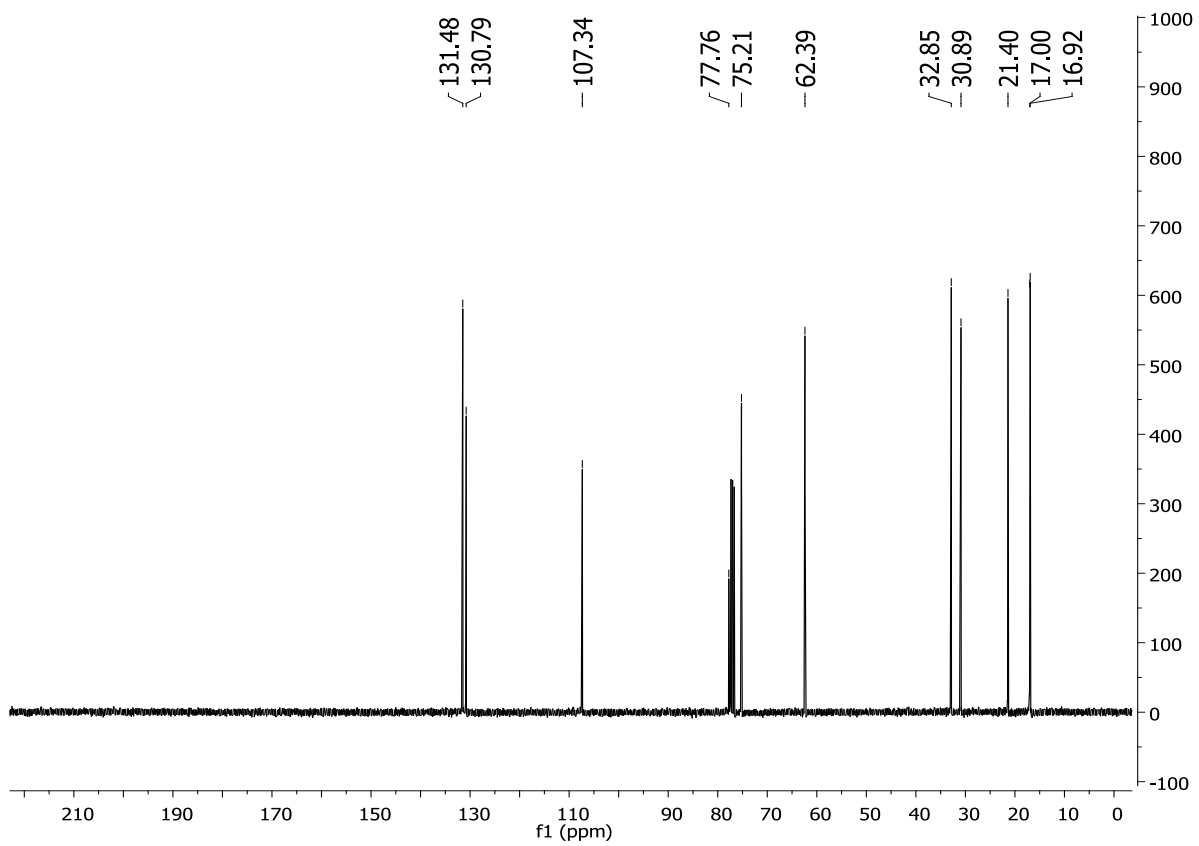



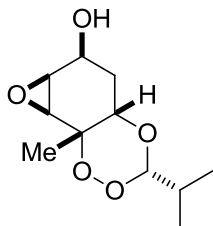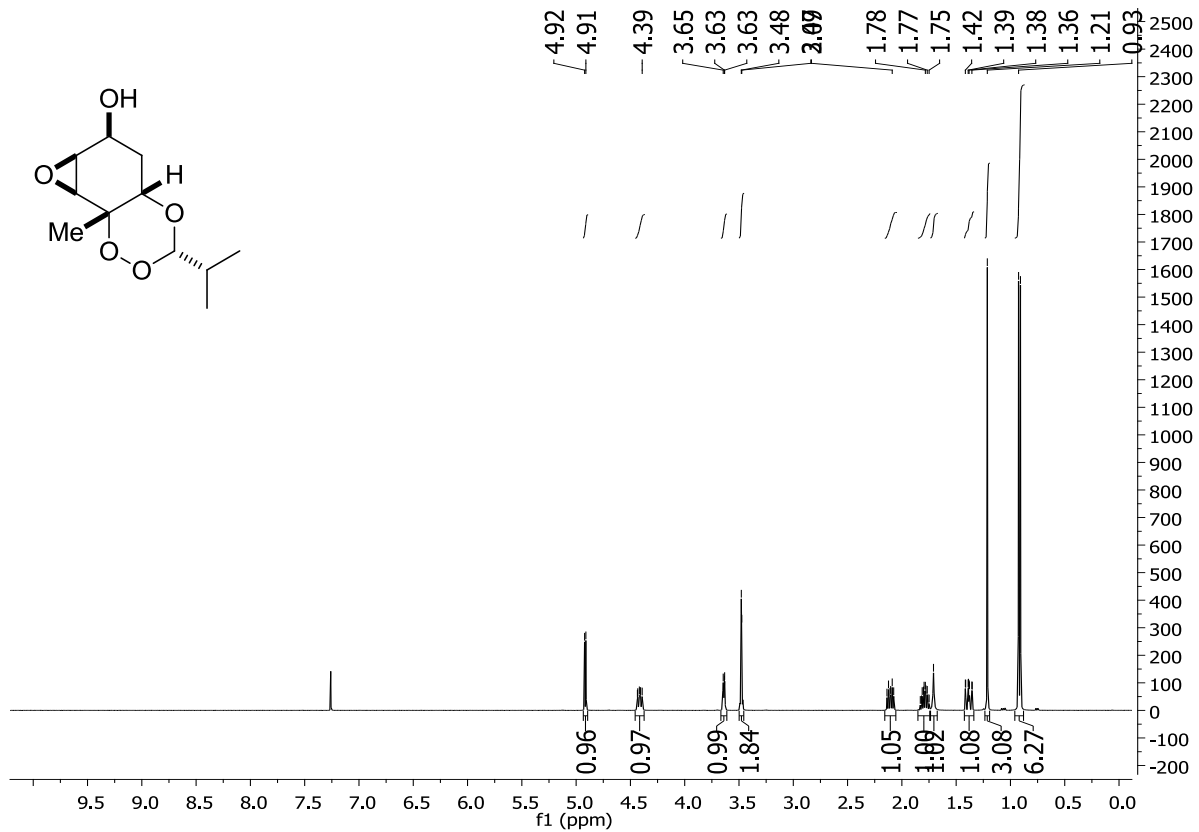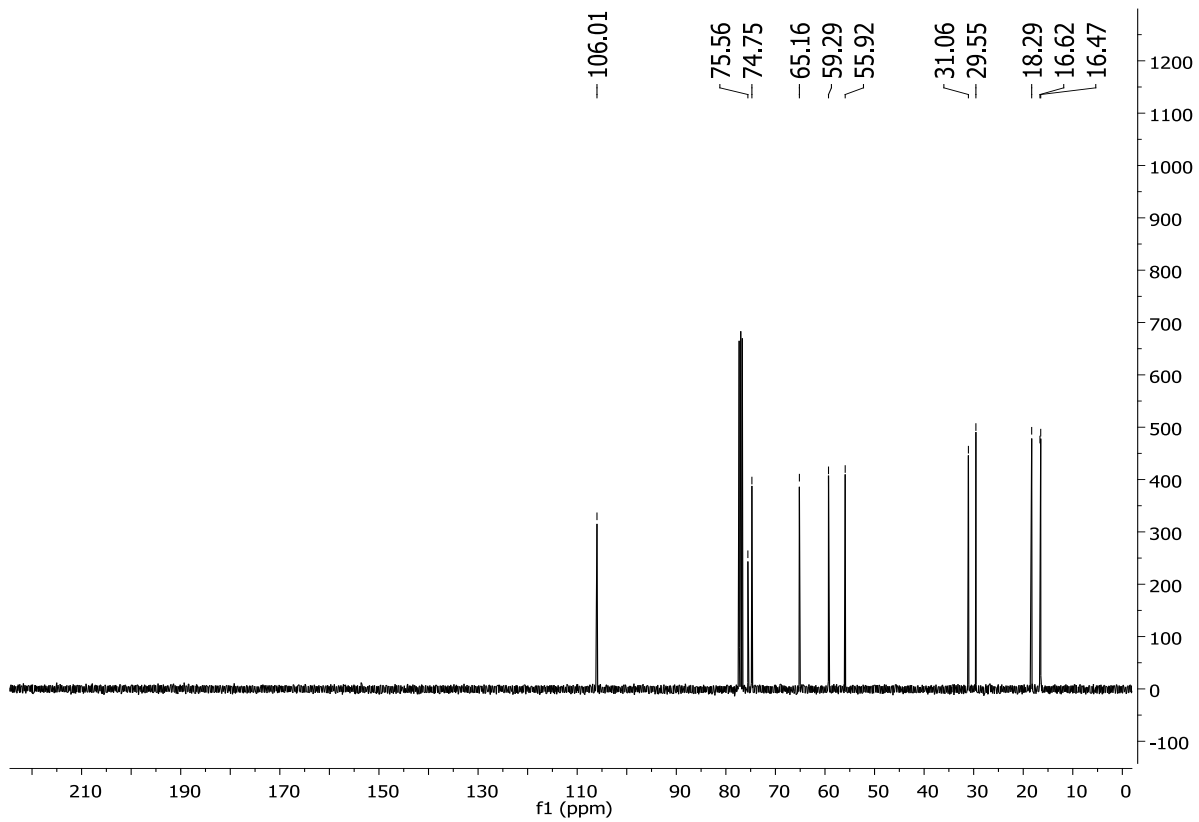

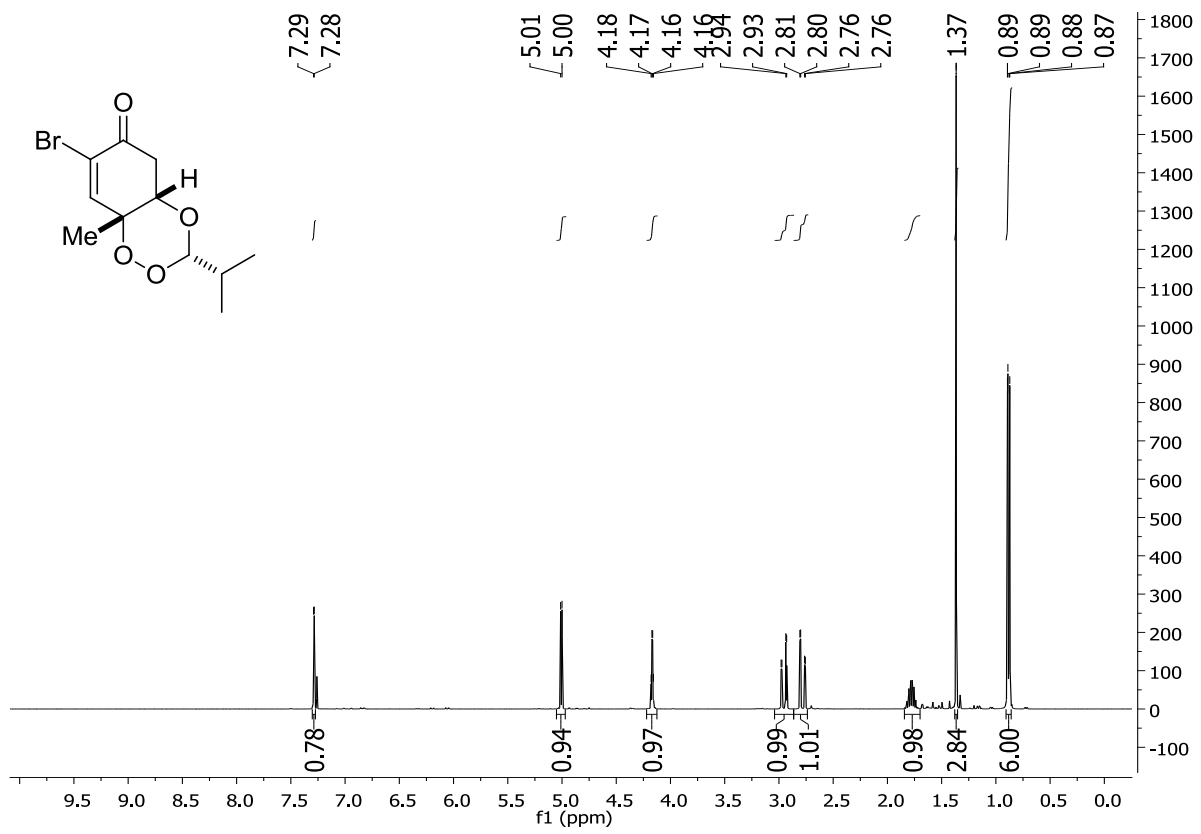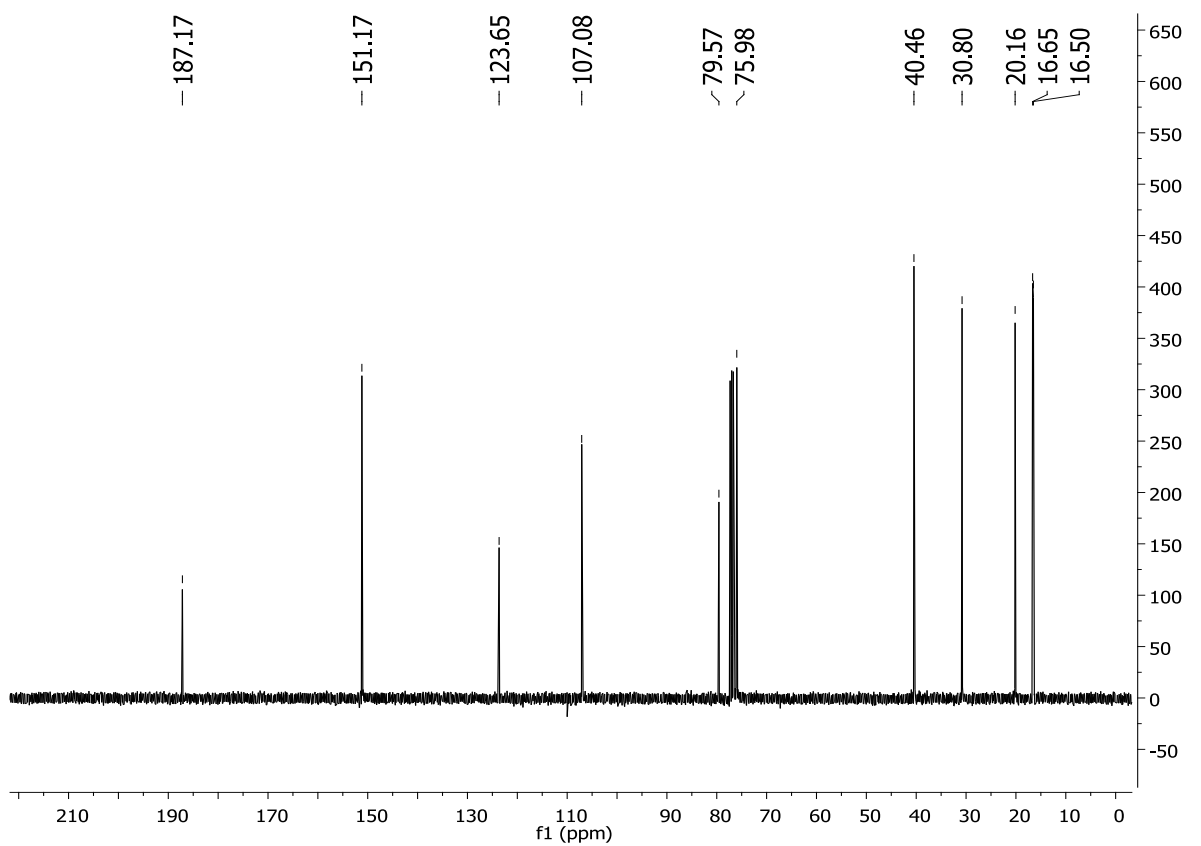

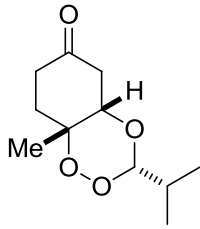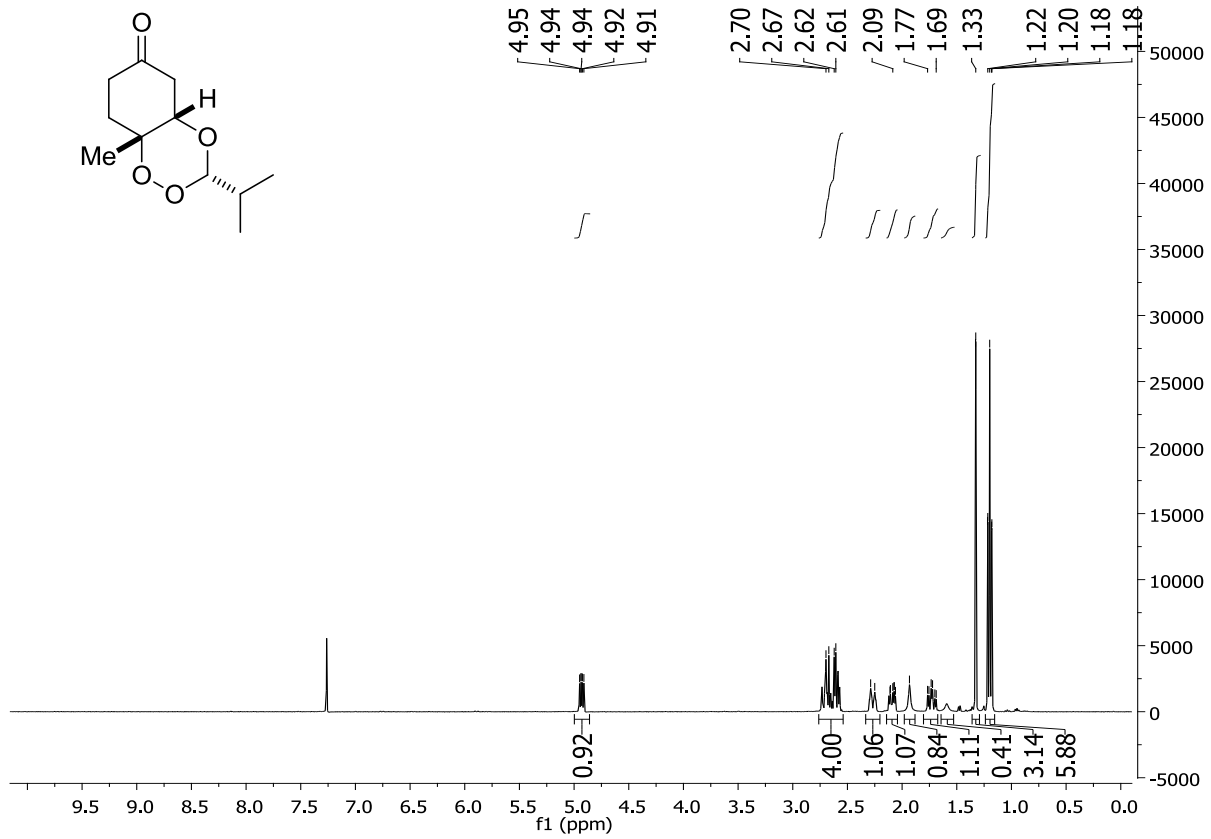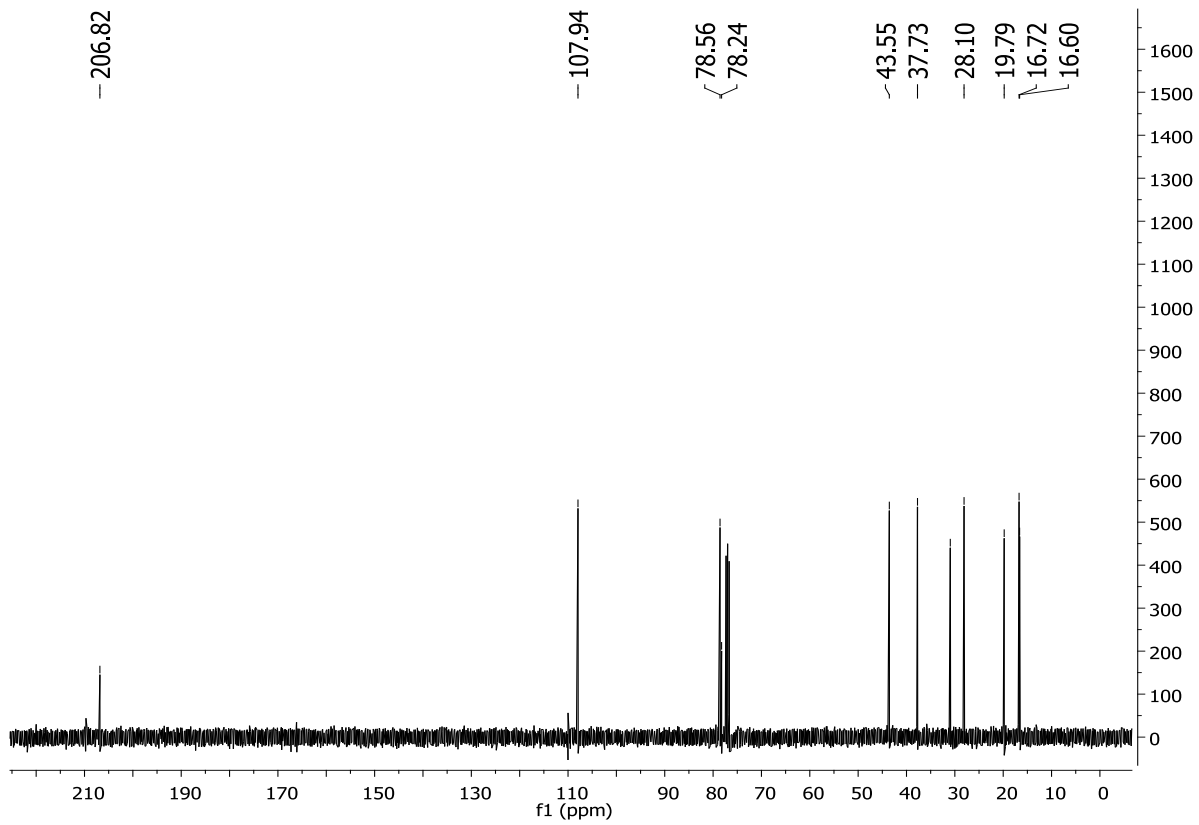

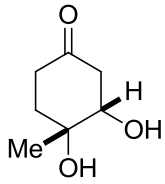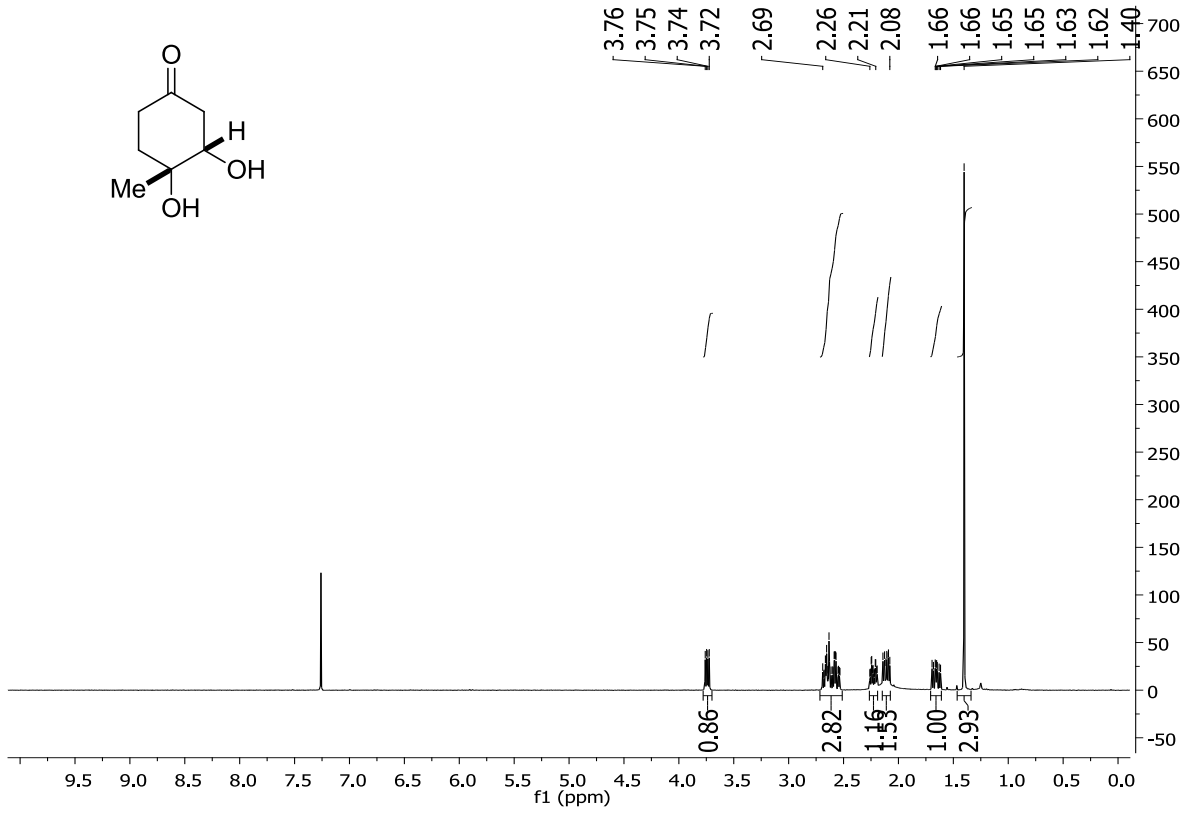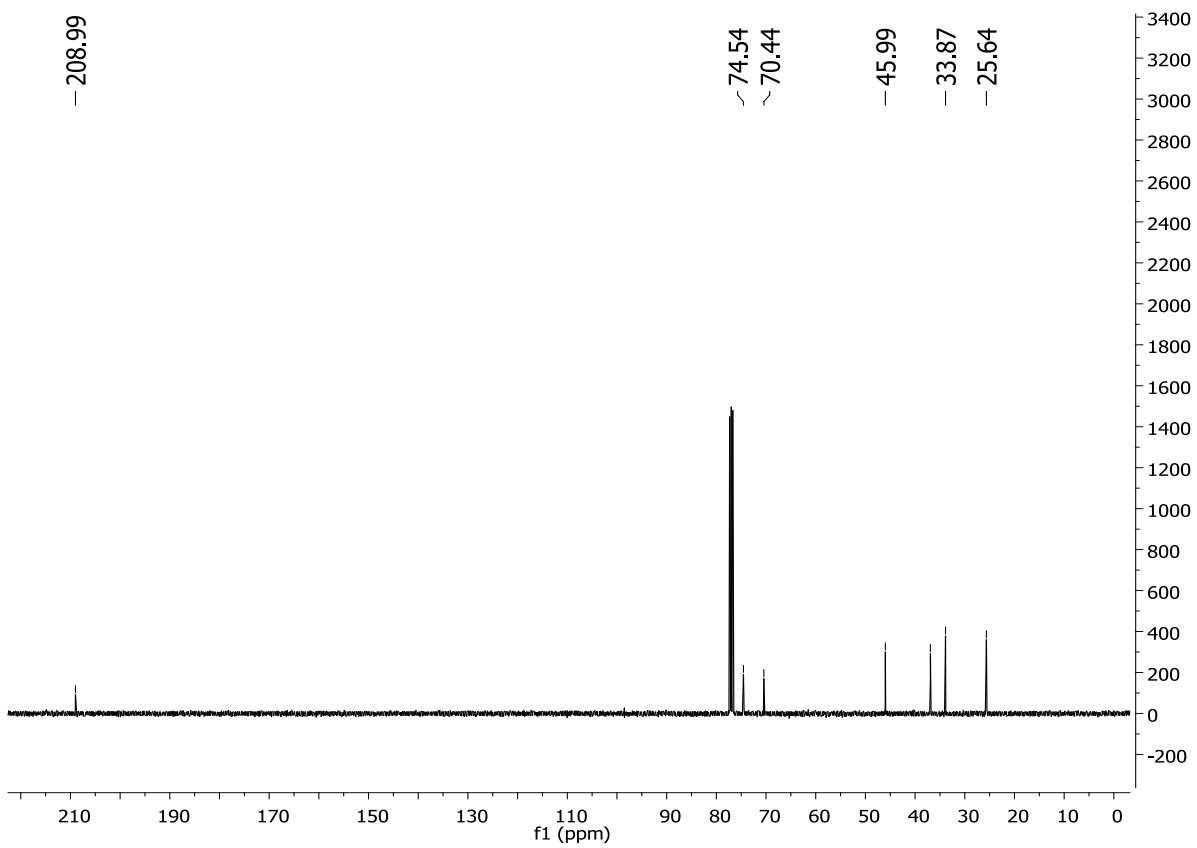

## Crystal Structure Tables for 4an

Table 1. Crystal data and structure refinement for Rovis130\_0m.

|                                   |                                                  |                       |
|-----------------------------------|--------------------------------------------------|-----------------------|
| Identification code               | rovis130_0m                                      |                       |
| Empirical formula                 | C <sub>14</sub> H <sub>13</sub> BrO <sub>4</sub> |                       |
| Formula weight                    | 325.15                                           |                       |
| Temperature                       | 120(2) K                                         |                       |
| Wavelength                        | 0.71073 Å                                        |                       |
| Crystal system                    | Orthorhombic                                     |                       |
| Space group                       | P2 <sub>1</sub> 2 <sub>1</sub> 2 <sub>1</sub>    |                       |
| Unit cell dimensions              | $a = 7.0393(3) \text{ \AA}$                      | $\alpha = 90^\circ$ . |
|                                   | $b = 10.7218(4) \text{ \AA}$                     | $\beta = 90^\circ$ .  |
|                                   | $c = 17.8586(7) \text{ \AA}$                     | $\gamma = 90^\circ$ . |
| Volume                            | 1347.86(9) Å <sup>3</sup>                        |                       |
| Z                                 | 4                                                |                       |
| Density (calculated)              | 1.602 Mg/m <sup>3</sup>                          |                       |
| Absorption coefficient            | 3.056 mm <sup>-1</sup>                           |                       |
| F(000)                            | 656                                              |                       |
| Crystal size                      | 0.28 x 0.17 x 0.15 mm <sup>3</sup>               |                       |
| Theta range for data collection   | 2.22 to 29.13°.                                  |                       |
| Index ranges                      | -9<=h<=9, -14<=k<=13, -24<=l<=24                 |                       |
| Reflections collected             | 29435                                            |                       |
| Independent reflections           | 3638 [R(int) = 0.0420]                           |                       |
| Completeness to theta = 29.13°    | 100.0 %                                          |                       |
| Absorption correction             | Semi-empirical from equivalents                  |                       |
| Max. and min. transmission        | 0.6639 and 0.4784                                |                       |
| Refinement method                 | Full-matrix least-squares on F <sup>2</sup>      |                       |
| Data / restraints / parameters    | 3638 / 0 / 174                                   |                       |
| Goodness-of-fit on F <sup>2</sup> | 1.096                                            |                       |
| Final R indices [I>2sigma(I)]     | R1 = 0.0318, wR2 = 0.0548                        |                       |
| R indices (all data)              | R1 = 0.0493, wR2 = 0.0709                        |                       |
| Absolute structure parameter      | 0.009(9)                                         |                       |
| Largest diff. peak and hole       | 0.698 and -0.443 e.Å <sup>-3</sup>               |                       |

Table 2. Atomic coordinates ( $\times 10^4$ ) and equivalent isotropic displacement parameters ( $\text{\AA}^2 \times 10^3$ ) for Rovis130\_0m.  $U(\text{eq})$  is defined as one third of the trace of the orthogonalized  $U^{ij}$  tensor.

|       | x        | y        | z       | $U(\text{eq})$ |
|-------|----------|----------|---------|----------------|
| Br(1) | 3192(1)  | -2371(1) | 8429(1) | 43(1)          |
| C(1)  | 5337(4)  | -1314(3) | 8579(2) | 27(1)          |
| C(2)  | 6892(5)  | -1758(2) | 8964(2) | 29(1)          |
| C(3)  | 8435(5)  | -976(2)  | 9058(1) | 25(1)          |
| C(4)  | 8420(4)  | 232(2)   | 8773(1) | 21(1)          |
| C(5)  | 6819(4)  | 658(2)   | 8391(1) | 25(1)          |
| C(6)  | 5269(4)  | -120(3)  | 8287(1) | 27(1)          |
| C(7)  | 10083(4) | 1074(3)  | 8880(1) | 23(1)          |
| C(8)  | 11035(4) | 3001(2)  | 9403(1) | 20(1)          |
| C(9)  | 10186(4) | 4140(2)  | 9778(1) | 22(1)          |
| C(10) | 8784(4)  | 4811(2)  | 9290(2) | 24(1)          |
| C(11) | 9187(4)  | 4808(2)  | 8484(2) | 27(1)          |
| C(12) | 10594(5) | 4124(3)  | 8188(2) | 28(1)          |
| C(13) | 13861(4) | 3959(3)  | 8742(2) | 32(1)          |
| C(14) | 11926(5) | 3341(2)  | 8648(1) | 24(1)          |
| O(1)  | 9505(3)  | 2133(2)  | 9294(1) | 20(1)          |
| O(2)  | 10650(3) | 1463(2)  | 8148(1) | 28(1)          |
| O(3)  | 12404(3) | 2201(2)  | 8256(1) | 30(1)          |
| O(4)  | 7415(3)  | 5350(2)  | 9550(1) | 33(1)          |

Table 3. Bond lengths [ $\text{\AA}$ ] and angles [ $^\circ$ ] for Rovis130\_0m.

---

|                 |          |
|-----------------|----------|
| Br(1)-C(1)      | 1.907(3) |
| C(1)-C(2)       | 1.377(4) |
| C(1)-C(6)       | 1.383(4) |
| C(2)-C(3)       | 1.383(4) |
| C(3)-C(4)       | 1.391(4) |
| C(4)-C(5)       | 1.394(4) |
| C(4)-C(7)       | 1.491(4) |
| C(5)-C(6)       | 1.386(4) |
| C(7)-O(1)       | 1.415(3) |
| C(7)-O(2)       | 1.428(3) |
| C(8)-O(1)       | 1.437(3) |
| C(8)-C(9)       | 1.515(4) |
| C(8)-C(14)      | 1.531(3) |
| C(9)-C(10)      | 1.500(4) |
| C(10)-O(4)      | 1.216(3) |
| C(10)-C(11)     | 1.467(4) |
| C(11)-C(12)     | 1.341(4) |
| C(12)-C(14)     | 1.504(4) |
| C(13)-C(14)     | 1.524(4) |
| C(14)-O(3)      | 1.448(3) |
| O(2)-O(3)       | 1.479(3) |
|                 |          |
| C(2)-C(1)-C(6)  | 122.4(3) |
| C(2)-C(1)-Br(1) | 119.6(2) |
| C(6)-C(1)-Br(1) | 118.0(2) |
| C(1)-C(2)-C(3)  | 118.4(3) |
| C(2)-C(3)-C(4)  | 120.9(3) |
| C(3)-C(4)-C(5)  | 119.3(3) |
| C(3)-C(4)-C(7)  | 120.7(3) |
| C(5)-C(4)-C(7)  | 119.9(2) |
| C(6)-C(5)-C(4)  | 120.3(2) |
| C(1)-C(6)-C(5)  | 118.7(3) |
| O(1)-C(7)-O(2)  | 108.9(2) |

|                   |            |
|-------------------|------------|
| O(1)-C(7)-C(4)    | 109.1(2)   |
| O(2)-C(7)-C(4)    | 106.2(2)   |
| O(1)-C(8)-C(9)    | 106.7(2)   |
| O(1)-C(8)-C(14)   | 110.0(2)   |
| C(9)-C(8)-C(14)   | 111.0(2)   |
| C(10)-C(9)-C(8)   | 112.8(2)   |
| O(4)-C(10)-C(11)  | 121.9(3)   |
| O(4)-C(10)-C(9)   | 121.8(2)   |
| C(11)-C(10)-C(9)  | 116.2(2)   |
| C(12)-C(11)-C(10) | 122.1(3)   |
| C(11)-C(12)-C(14) | 123.4(2)   |
| O(3)-C(14)-C(12)  | 110.6(2)   |
| O(3)-C(14)-C(13)  | 102.3(2)   |
| C(12)-C(14)-C(13) | 112.0(2)   |
| O(3)-C(14)-C(8)   | 108.7(2)   |
| C(12)-C(14)-C(8)  | 111.0(2)   |
| C(13)-C(14)-C(8)  | 111.9(2)   |
| C(7)-O(1)-C(8)    | 112.0(2)   |
| C(7)-O(2)-O(3)    | 105.71(19) |
| C(14)-O(3)-O(2)   | 108.70(18) |

---

Symmetry transformations used to generate equivalent atoms:



Table 4. Anisotropic displacement parameters ( $\text{\AA}^2 \times 10^3$ ) for Rovis130\_0m. The anisotropic displacement factor exponent takes the form:  $-2\pi^2 [ h^2 a^{*2} U^{11} + \dots + 2 h k a^* b^* U^{12} ]$

|       | U <sup>11</sup> | U <sup>22</sup> | U <sup>33</sup> | U <sup>23</sup> | U <sup>13</sup> | U <sup>12</sup> |
|-------|-----------------|-----------------|-----------------|-----------------|-----------------|-----------------|
| Br(1) | 35(1)           | 37(1)           | 57(1)           | -18(1)          | 0(1)            | -6(1)           |
| C(1)  | 25(2)           | 25(2)           | 31(2)           | -12(1)          | 3(1)            | 0(1)            |
| C(2)  | 34(2)           | 19(1)           | 34(2)           | -3(1)           | 6(2)            | 3(2)            |
| C(3)  | 27(2)           | 22(1)           | 27(1)           | -3(1)           | 1(1)            | 5(1)            |
| C(4)  | 24(2)           | 20(1)           | 18(1)           | -4(1)           | 8(1)            | 3(1)            |
| C(5)  | 34(2)           | 23(1)           | 18(1)           | -1(1)           | 3(1)            | 6(1)            |
| C(6)  | 27(2)           | 30(2)           | 23(1)           | -8(1)           | -3(1)           | 9(1)            |
| C(7)  | 31(2)           | 20(1)           | 19(1)           | 0(1)            | 3(1)            | 3(1)            |
| C(8)  | 22(2)           | 24(1)           | 16(1)           | 2(1)            | -4(1)           | 0(1)            |
| C(9)  | 25(2)           | 21(1)           | 19(1)           | 0(1)            | -2(1)           | -4(1)           |
| C(10) | 27(2)           | 16(1)           | 28(1)           | 1(1)            | -1(1)           | -1(1)           |
| C(11) | 30(2)           | 25(1)           | 26(1)           | 8(1)            | -8(1)           | -3(1)           |
| C(12) | 35(2)           | 29(2)           | 21(1)           | 6(1)            | -3(1)           | -9(1)           |
| C(13) | 26(2)           | 36(2)           | 34(2)           | 6(1)            | 4(1)            | -5(1)           |
| C(14) | 25(2)           | 25(1)           | 21(1)           | 2(1)            | 2(1)            | -1(1)           |
| O(1)  | 24(1)           | 17(1)           | 19(1)           | -1(1)           | 2(1)            | -1(1)           |
| O(2)  | 35(1)           | 27(1)           | 22(1)           | -4(1)           | 8(1)            | -5(1)           |
| O(3)  | 28(1)           | 29(1)           | 32(1)           | -3(1)           | 10(1)           | -3(1)           |
| O(4)  | 30(1)           | 27(1)           | 42(1)           | 0(1)            | 2(1)            | 5(1)            |

Table 5. Hydrogen coordinates ( $\times 10^4$ ) and isotropic displacement parameters ( $\text{\AA}^2 \times 10^3$ ) for Rovis130\_0m.

|        | x     | y     | z     | U(eq) |
|--------|-------|-------|-------|-------|
| H(2)   | 6903  | -2581 | 9161  | 35    |
| H(3)   | 9522  | -1267 | 9320  | 30    |
| H(5)   | 6790  | 1485  | 8201  | 30    |
| H(6)   | 4183  | 161   | 8020  | 32    |
| H(7)   | 11143 | 628   | 9140  | 28    |
| H(8)   | 12019 | 2623  | 9736  | 24    |
| H(9A)  | 9546  | 3880  | 10246 | 26    |
| H(9B)  | 11223 | 4722  | 9914  | 26    |
| H(11)  | 8428  | 5307  | 8162  | 32    |
| H(12)  | 10757 | 4135  | 7659  | 34    |
| H(13A) | 14704 | 3403  | 9024  | 48    |
| H(13B) | 13712 | 4746  | 9015  | 48    |
| H(13C) | 14413 | 4125  | 8248  | 48    |

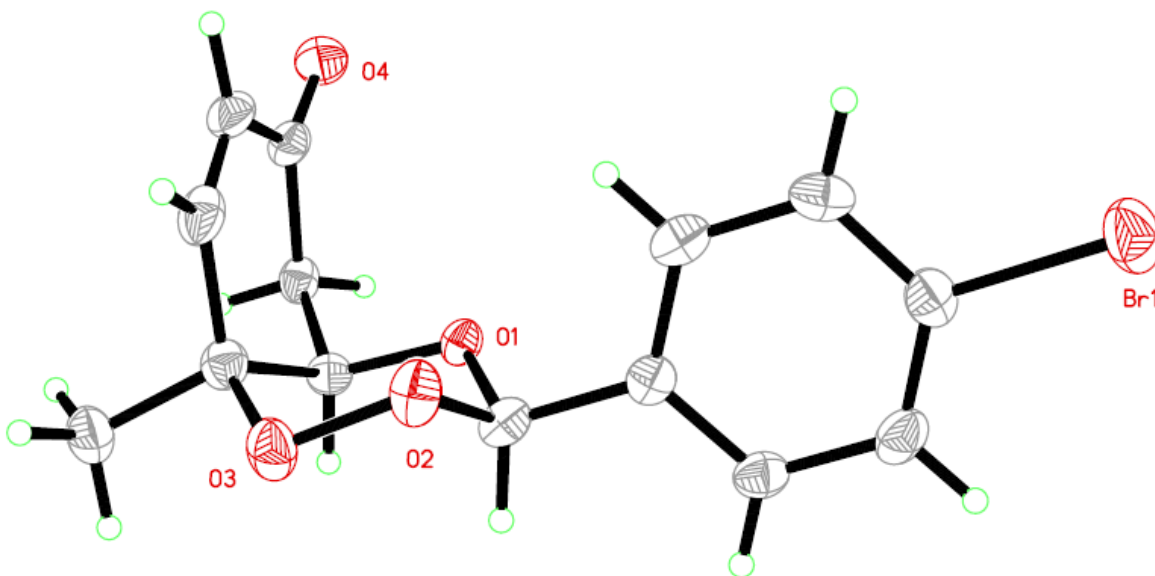

## References

<sup>1</sup> Carreno, M. C.; Gonzalez-Lopez, M.; Urbano, A.; *Angew. Chem. Int. Ed.* **2006**, *45*, 2737.

<sup>2</sup> Xing, C.-H.; Liao, Y.-X.; Ng, J.; Hu, Q.-S. *J. Org. Chem.* **2011**, *76*, 4125-4131.
